# Supplementary material for: Epithelial Mutant p53 Promotes Resistance to Anti-PD-1-Mediated Oral Cancer Immunoprevention in Carcinogen-Induced Mouse Models
Source: Cancers (Basel). 2021 Mar 23;13(6):1471. doi: 10.3390/cancers13061471 (PMC8005156; doi:10.3390/cancers13061471)
Supplement: Supplementary file 1 [file cancers-13-01471-s001.zip]

Archive with 7 entries (7 files):
- Supplementary Figures S1-S4.pdf
- Supplementary Table S1.xlsx
- Supplementary Table S2.xlsx
- Supplementary Table S3.xlsx
- Supplementary Table S4.xlsx
- Supplementary Table S5.xlsx
- Supplementary Table S6.xlsx
