# Supplementary material for: Epithelial Mutant p53 Promotes Resistance to Anti-PD-1-Mediated Oral Cancer Immunoprevention in Carcinogen-Induced Mouse Models
Source: Cancers (Basel). 2021 Mar 23;13(6):1471. doi: 10.3390/cancers13061471 (PMC8005156; doi:10.3390/cancers13061471)
Supplement: Supplementary file 1 [file cancers-13-01471-s001.zip › Supplementary Table S1.xlsx]

## Sheet: IHC
Supplementary Table S1
Number of samples analyzed by immunohistochemistry
Figure 2A	CD3	CD8	CD4
OM(Unt)	17	17	17
OM(Car)	32	32	32
Papilloma	25	24	24
SCC	19	19	19
Figures 2B, 2C, S3	CD3	CD8	CD4
OM(Car) p53-WT	10	10	10
OM(Car) p53-LOF	11	11	11
OM(Car) p53-GOF	11	11	11
Papilloma p53-WT	7	6	7
Papilloma p53-LOF	8	10	7
Papilloma p53-GOF	10	8	10
SCC p53-WT	6	6	6
SCC p53-LOF	6	6	6
SCC p53-GOF	7	7	7
Figures 3A, 3D, 3E	Foxp3	PD-1	PD-L1
OM(Unt)	16	17	17
OM(Car)	33	30	33
Papilloma	25	19	25
SCC	20	18	19
Figures 3B, 3C, 3F, 3G, S3	Foxp3	PD-1	PD-L1
OM(Car) p53-WT	10	9	10
OM(Car) p53-LOF	11	11	11
OM(Car) p53-GOF	12	10	12
Papilloma p53-WT	5	6	6
Papilloma p53-LOF	9	7	8
Papilloma p53-GOF	11	4	11
SCC p53-WT	6	5	6
SCC p53-LOF	6	6	6
SCC p53-GOF	8	7	7
