# Supplementary material for: Epithelial Mutant p53 Promotes Resistance to Anti-PD-1-Mediated Oral Cancer Immunoprevention in Carcinogen-Induced Mouse Models
Source: Cancers (Basel). 2021 Mar 23;13(6):1471. doi: 10.3390/cancers13061471 (PMC8005156; doi:10.3390/cancers13061471)
Supplement: Supplementary file 1 [file cancers-13-01471-s001.zip › Supplementary Table S2.xlsx]

## Sheet: Nanostring counts
Supplementary Table S2
Nanostring counts
	GOF-1	GOF-2	LOF-1	LOF-2	WT-1	WT-2	GOF-3	LOF-3	WT-3	GOF-4	WT-4	LOF-4	LOF-5	WT-5	GOF-5
A2m	55	17	20	8	20	17	6	38	17	28	10	25	37	14	19
Abca1	907	728	272	870	612	661	564	296	1076	412	401	814	936	573	409
Abcb1a	403	249	80	170	240	381	321	132	230	166	161	106	411	299	231
Abcf1	637	782	483	513	542	604	633	380	635	581	312	640	715	584	500
Abcg1	406	676	441	739	400	415	330	182	548	421	252	604	560	302	311
Abl1	882	820	550	684	551	624	688	255	699	661	376	820	765	589	457
Ada	7539	13442	10786	8626	4795	23875	9845	5183	12514	10672	3503	5064	8888	8845	7428
Adora2a	20	13	10	47	27	28	32	5	27	14	35	19	39	24	18
Aicda	16	7	7	7	5	15	10	9	8	6	6	6	9	5	9
Aire	18	11	21	25	12	12	8	7	9	11	5	20	14	14	17
Akt3	341	260	231	373	336	408	435	172	412	289	349	230	557	397	306
Alas1	1489	2240	1569	2492	2333	2166	2623	1369	1728	2482	1301	2671	2562	2587	1836
Alcam	320	505	204	296	286	327	160	102	181	308	202	222	425	95	169
Ambp	5	7	10	8	5	11	11	5	8	6	5	9	19	5	32
Amica1	166	154	95	240	93	132	118	106	693	149	93	173	251	87	132
Angpt1	18	12	13	44	43	81	35	15	33	23	37	6	44	105	49
Angpt2	201	101	98	322	79	94	140	65	248	206	63	337	208	101	184
Anp32b	4792	5055	3003	4517	3650	2966	2474	1680	3395	3460	2251	5271	4434	2634	3968
Anxa1	14220	8738	10429	21298	6603	2536	7346	4156	13317	15591	1567	30724	20781	2869	7543
Apoe	5949	3866	979	12036	4462	4758	4668	2869	9452	4843	6632	7275	6975	3607	4155
App	6646	5133	4915	5024	5260	4681	4652	2528	5774	4873	2552	7543	7097	4098	4270
Arg1	5219	2844	2504	5276	5052	1408	1028	2231	3795	2118	547	4040	3718	2567	1911
Arg2	165	128	35	126	103	83	27	38	49	73	26	66	151	38	28
Atf1	417	464	226	426	383	316	227	156	263	278	243	488	415	276	239
Atf2	759	629	425	575	519	482	509	231	523	504	165	706	573	439	364
Atg10	168	104	111	206	258	290	268	121	151	197	153	150	257	278	200
Atg12	620	527	429	546	443	576	531	296	554	522	408	830	546	511	446
Atg16l1	820	686	431	572	538	469	439	269	468	537	155	686	644	444	414
Atg5	124	200	271	333	196	271	365	111	247	270	250	316	339	253	213
Atg7	199	240	177	202	178	196	126	96	184	155	96	175	258	171	138
Atm	363	302	261	309	256	336	294	142	299	321	116	426	416	321	297
Axl	1407	968	572	1879	1155	1438	1647	606	3042	1314	1709	934	1757	1448	1167
Batf	23	19	30	110	45	41	33	21	71	55	54	45	88	37	32
Bax	311	306	208	338	223	235	150	125	277	307	289	430	352	248	228
Bcl10	1844	2083	1075	1678	1481	777	1067	680	1383	1579	990	2656	1602	766	686
Bcl2	197	253	157	174	160	182	170	82	187	177	152	135	227	117	145
Bcl2l1	1385	970	490	721	634	591	543	390	988	801	350	647	797	404	584
Bcl6	344	412	245	420	249	449	424	164	339	383	248	438	452	760	238
Bid	100	54	53	90	42	54	23	34	122	70	31	61	108	30	41
Birc5	180	170	139	283	152	77	62	61	152	187	60	347	243	63	160
Blk	24	25	18	41	25	29	16	33	24	37	37	16	18	11	10
Blnk	333	655	498	535	562	936	355	214	429	677	539	435	694	362	454
Bmi1	132	205	137	242	251	222	253	138	207	203	228	194	223	267	160
Bst1	72	39	38	294	75	66	60	31	217	98	124	198	310	69	73
Bst2	137	167	149	356	291	538	418	101	289	413	529	224	739	515	710
Btk	37	21	30	152	58	51	41	20	59	46	105	37	124	58	44
Btla	18	15	9	17	14	28	8	4	16	18	13	7	15	12	8
C1qa	586	437	293	2730	825	951	820	372	2672	1024	1496	987	2178	1071	803
C1qb	152	108	168	1352	492	434	247	175	1315	456	703	603	1042	449	369
C1qbp	2370	2856	1471	2314	2189	2225	1903	1266	1731	2096	1632	2680	2659	2247	2311
C1ra	528	287	344	1370	639	794	449	324	529	708	641	499	1352	829	717
C1s1	968	535	1138	2258	1093	1149	1192	629	922	1273	2061	1444	3010	1163	1903
C2	172	42	22	155	58	108	48	62	138	86	89	90	171	88	183
C3	2649	925	646	4631	2494	2209	1831	1563	2275	3082	2699	1018	3356	2149	1968
C3ar1	70	74	86	1055	201	211	184	86	560	173	664	387	646	246	170
C4b	1666	762	219	3454	1026	1238	1327	653	1786	1198	1621	658	1732	1086	1085
C5ar1	69	108	36	837	122	132	109	71	454	199	281	230	584	196	149
C6	38	15	16	167	37	47	47	27	28	50	114	18	81	28	44
C7	343	126	11	79	56	31	12	29	62	19	29	20	25	14	12
C8a	7	1	4	8	3	4	5	3	6	7	2	1	9	2	5
C8b	10	5	4	28	7	13	7	4	9	6	6	17	18	7	9
C8g	14	4	19	16	11	25	19	8	16	8	15	15	29	18	21
C9	22	6	12	3	8	14	6	7	7	4	5	4	10	7	9
Camp	7	2	8	9	12	7	12	6	9	7	11	7	15	63	6
Card11	12	8	9	30	14	14	10	4	10	20	11	12	34	10	19
Card9	13	26	13	52	25	21	23	15	32	31	28	22	40	15	19
Casp1	606	786	788	629	547	617	210	200	561	794	63	1071	685	660	424
Casp3	197	139	134	214	129	116	82	64	180	140	78	248	255	105	161
Casp8	414	384	429	684	392	439	338	223	585	457	241	774	674	334	391
Ccl1	13	7	17	21	5	12	3	6	15	9	8	26	24	8	15
Ccl11	1917	731	709	1075	569	497	677	444	1051	1030	788	362	668	901	848
Ccl12	9	9	39	245	30	29	23	9	95	59	130	41	122	66	35
Ccl17	27	40	16	27	56	37	27	18	24	17	30	32	38	12	44
Ccl19	61	41	23	234	114	115	96	60	34	115	64	106	114	180	125
Ccl2	175	115	189	640	127	47	97	28	890	374	236	361	1200	97	147
Ccl20	49	43	52	51	48	13	18	11	25	88	16	46	24	5	70
Ccl21a	543	195	326	4396	1009	1912	981	311	784	1559	572	993	3951	2046	1579
Ccl22	17	23	34	79	68	112	15	29	23	89	111	52	86	22	86
Ccl24	28	8	28	76	24	148	56	7	21	56	165	1	101	92	63
Ccl25	113	69	52	71	52	50	45	23	56	53	19	110	87	56	31
Ccl26	11	7	8	12	13	8	4	3	12	3	4	10	6	8	5
Ccl27a	55	92	73	95	97	116	136	38	100	90	100	131	117	116	82
Ccl28	15	11	65	12	109	8	17	54	13	15	26	50	14	20	8
Ccl3	32	66	9	359	32	16	18	9	204	134	49	142	203	18	148
Ccl4	15	20	8	101	17	10	7	6	45	22	20	32	67	12	15
Ccl5	4	10	18	49	23	8	5	6	38	10	39	79	96	17	39
Ccl6	75	116	123	1247	333	229	201	171	1105	294	710	254	478	212	216
Ccl7	11	5	48	211	22	19	20	16	118	64	103	72	148	50	41
Ccl8	91	24	64	2877	150	189	127	53	201	340	634	382	828	173	512
Ccl9	236	169	136	3509	602	537	445	250	2601	712	1381	714	1274	726	547
Ccnd3	344	337	245	335	216	306	213	132	414	373	292	529	460	284	306
Ccr1	33	72	46	473	104	58	63	53	297	100	150	171	393	70	88
Ccr2	17	15	53	988	110	282	92	101	88	299	672	151	291	51	301
Ccr3	6	8	5	57	3	3	5	1	13	3	11	24	9	6	15
Ccr4	4	6	5	9	6	7	6	3	3	17	13	10	13	7	10
Ccr5	9	14	28	536	55	50	37	18	103	80	187	183	234	72	71
Ccr6	7	56	14	31	13	31	18	20	22	58	21	23	41	21	35
Ccr7	44	23	29	48	36	28	13	18	24	45	24	47	64	19	40
Ccr8	21	10	8	20	7	12	5	6	23	15	6	17	14	18	17
Ccr9	129	93	27	63	62	23	17	29	57	36	12	89	56	18	27
Ccrl2	311	155	41	234	139	93	100	53	99	64	70	100	291	83	141
Cd14	292	468	75	1309	233	94	142	105	676	245	300	715	1389	194	205
Cd160	22	6	11	12	18	13	8	4	9	10	8	13	16	11	15
Cd163	235	84	71	748	221	351	400	176	382	302	341	135	294	273	322
Cd164	4952	4729	2859	3834	4344	2748	2404	1860	3108	3048	1839	5502	4170	2614	2293
Cd180	11	7	24	125	42	61	19	19	22	26	60	46	120	54	48
Cd19	13	4	7	10	4	6	2	2	12	6	3	9	6	6	4
Cd1d1	96	147	98	99	234	84	66	61	125	107	80	223	189	98	52
Cd1d2	21	8	12	11	27	16	9	8	11	12	3	29	18	19	17
Cd2	12	7	15	56	17	26	18	11	21	22	18	13	36	21	20
Cd200	295	218	146	410	160	588	477	145	401	223	265	229	573	545	351
Cd200r1	12	6	14	119	8	27	17	9	43	19	26	28	53	25	29
Cd207	16	19	69	48	81	124	37	34	35	165	62	52	76	59	66
CD209e	15	7	8	57	6	15	15	10	10	15	58	8	19	10	25
Cd22	6	7	5	45	8	9	4	2	16	3	2	15	35	7	8
Cd244	29	28	36	90	43	66	33	21	34	13	32	19	149	51	13
Cd247	24	31	18	40	32	33	23	36	16	37	41	26	42	21	20
Cd27	9	5	15	13	9	9	7	6	3	11	10	5	6	7	11
Cd274	191	125	62	291	319	181	239	60	137	108	141	202	588	124	191
Cd276	186	244	424	368	328	195	151	79	285	178	97	567	430	152	283
Cd28	34	14	21	22	36	24	17	11	18	24	47	23	25	18	26
Cd33	50	88	19	210	74	62	53	64	207	61	62	90	240	77	56
Cd34	999	959	652	2737	1546	2788	1707	557	1229	1831	1417	685	2517	2676	1628
Cd36	5876	7263	1747	6037	7470	7076	9162	5163	6659	4749	2738	1471	5604	8437	4946
Cd37	85	57	53	340	98	149	101	45	216	98	272	112	279	102	91
Cd38	174	103	51	336	144	205	124	89	708	161	246	321	269	188	132
Cd3d	29	31	28	47	33	33	19	41	28	58	63	31	58	19	39
Cd3e	29	19	32	66	33	41	29	33	23	66	53	33	75	19	48
Cd3eap	138	169	174	255	117	190	153	108	182	291	152	341	187	124	107
Cd3g	18	17	35	40	25	30	25	34	29	67	47	36	40	25	50
Cd4	14	13	17	98	21	15	25	10	36	49	27	41	90	18	18
Cd40	18	14	20	75	26	41	28	10	30	28	63	34	79	45	44
Cd40lg	21	18	18	24	25	19	15	20	12	11	4	25	30	13	14
Cd44	60	48	42	46	44	52	28	15	43	47	40	79	58	39	29
Cd46	10	5	5	3	10	9	2	8	4	2	10	9	7	7	8
Cd47	1255	812	483	976	821	886	615	413	1177	940	467	871	1172	611	700
Cd48	26	19	26	248	40	93	50	31	89	68	71	74	219	83	76
Cd5	360	393	264	441	278	385	153	148	273	314	148	214	512	175	212
Cd53	28	21	13	75	32	24	24	19	50	40	30	38	62	33	29
Cd55	112	127	112	348	242	318	337	80	180	261	97	85	330	305	207
Cd59b	43	28	19	28	48	48	34	10	25	14	24	16	25	29	27
Cd6	9	11	8	43	10	10	10	7	11	31	16	17	38	7	19
Cd63	5146	5939	2913	7972	4924	4566	4984	2310	8114	4637	5428	6525	8305	4964	3608
Cd68	485	584	332	1856	374	462	371	188	1246	524	782	1185	1443	432	480
Cd69	19	29	14	67	19	19	28	20	21	35	23	28	67	12	38
Cd7	18	19	15	27	13	9	10	13	13	22	15	25	28	32	27
Cd70	22	8	6	17	16	24	8	5	10	5	9	14	19	11	16
Cd74	675	1391	1664	9369	4121	6632	2546	1526	1413	5254	4359	4152	9885	5986	6248
Cd79a	6	4	5	8	9	7	7	5	10	4	8	8	11	1	5
Cd79b	9	2	7	26	7	10	11	3	5	11	5	9	13	7	12
Cd80	63	51	99	286	57	65	65	24	156	110	99	366	312	77	62
Cd81	5302	5059	5402	7206	5580	5512	4831	1848	5152	5410	2844	7866	7278	5333	5132
Cd83	33	19	33	115	52	100	76	16	28	92	146	49	142	100	63
Cd84	59	74	67	680	147	124	117	46	249	101	155	172	465	137	88
Cd86	35	55	34	104	57	66	67	36	79	112	65	68	117	55	70
Cd8a	10	4	11	14	8	8	7	9	6	8	4	15	10	7	13
Cd8b1	14	10	6	5	5	11	11	9	5	4	3	7	5	7	6
Cd9	10810	11304	6423	8415	7226	6972	5016	3854	7312	8488	2225	13296	10597	4694	6278
Cd96	10	7	11	7	9	18	8	2	15	9	10	10	13	15	10
Cd97	276	370	253	964	465	644	753	210	550	547	667	457	1002	716	466
Cd99	3670	3030	2550	3341	2098	2230	2704	962	3313	2459	866	4182	3354	1771	1387
Cdh1	5774	6257	3042	5596	4299	4022	2010	1706	3045	3950	1156	6837	5128	2197	3585
Cdh5	676	614	212	585	571	733	774	264	622	576	300	285	726	876	566
Cdk1	20	61	13	36	36	15	10	19	23	26	11	45	47	14	21
Cdkn1a	7175	7570	2455	5964	3615	4098	2155	1846	3659	3818	3354	4585	4959	1829	2385
Ceacam1	378	175	260	369	390	142	273	140	146	412	48	509	404	101	303
Cebpb	3540	4677	2521	4251	2984	3425	3144	1890	4152	4168	2921	3209	4585	3264	2157
Cfb	44	20	12	252	80	93	67	43	81	76	80	176	268	134	80
Cfd	46	79	53	45	673	112	133	36	35	13	414	53	293	346	106
Cfh	2680	1414	376	1976	1596	1073	898	1215	1966	698	408	917	2015	1073	1176
Cfi	19	7	7	10	9	16	9	7	8	13	5	11	15	13	9
Cfp	45	70	51	334	87	207	130	47	326	197	130	175	313	200	134
Chil3	64	170	17	698	107	16	23	58	174	77	26	211	73	46	55
Chit1	10343	6395	5502	4406	3085	3327	3107	2437	3439	4742	1110	8221	4449	2736	2893
Chuk	1280	1173	947	1201	976	1093	1087	584	1090	1103	606	1427	1460	895	891
Ciita	14	13	47	205	49	67	42	13	17	54	106	44	169	70	79
Cklf	13	19	26	46	18	24	14	8	24	31	17	37	47	25	30
Clec4a2	8	9	13	141	24	28	18	13	95	50	40	71	90	38	31
Clec4n	34	21	29	298	42	26	35	21	285	83	208	114	468	54	47
Clec5a	15	21	16	100	41	25	25	12	39	21	47	65	179	29	25
Clec7a	13	29	27	345	66	24	50	24	18	44	128	53	356	38	58
Clu	1485	1227	1155	876	1458	1542	877	434	990	978	608	1237	1663	1601	936
Cma1	78	107	59	780	160	431	317	151	312	530	340	116	326	283	484
Cmah	28	28	21	358	53	146	93	26	35	73	69	53	232	153	83
Cmklr1	243	284	123	529	231	274	309	243	455	335	429	311	568	341	240
Cmpk2	56	63	36	52	97	139	114	34	54	58	140	32	139	125	124
Col1a1	225	336	783	11718	1088	1345	1393	1896	4792	1005	1665	3179	6727	2477	1924
Col3a1	416	542	604	18374	2168	3477	2012	2782	3701	2119	3778	3977	12348	5193	2798
Col4a1	1365	1157	899	2430	1256	832	1117	571	3533	1271	498	1928	2385	1564	826
Colec12	264	233	147	529	357	478	403	183	692	284	193	213	694	397	232
Cr2	13	11	10	13	9	10	8	7	11	10	13	11	10	7	12
Creb1	281	198	244	318	193	273	319	175	243	306	327	395	327	233	243
Creb5	366	184	285	186	182	170	204	106	266	341	182	382	270	182	237
Crebbp	2827	2848	1366	1854	1924	1553	1494	940	1612	1850	1197	2160	1853	1309	1234
Crp	15	10	6	16	11	7	10	8	23	8	6	7	15	9	12
Csf1	163	152	209	482	303	367	244	87	434	279	92	183	612	320	239
Csf1r	187	180	102	958	367	468	348	170	895	489	317	319	859	396	333
Csf2	17	7	5	22	16	11	6	11	51	7	10	21	17	6	11
Csf2rb	153	133	52	559	178	124	157	94	324	222	498	180	425	132	144
Csf3	58	39	22	164	37	14	7	35	242	28	27	150	36	11	54
Csf3r	35	51	28	591	86	29	73	28	122	81	166	148	616	79	73
Cspg4	349	268	344	377	305	526	457	109	382	400	314	323	899	400	356
Ctla4	91	58	35	143	71	35	30	36	56	82	44	71	154	36	34
Ctsg	9	4	7	12	6	8	7	5	4	8	7	9	11	13	4
Ctsh	1167	464	658	1336	698	580	584	345	843	538	360	2189	1073	426	800
Ctsl	1062	1142	248	1182	736	544	437	353	856	458	367	992	709	483	480
Ctss	365	477	266	4526	732	487	482	280	1437	621	651	2356	4026	858	576
Ctsw	15	9	14	38	14	8	18	6	10	24	15	22	41	21	28
Cx3cl1	146	134	125	123	125	134	79	51	56	83	62	113	181	106	95
Cx3cr1	139	160	103	202	198	80	69	46	68	97	189	90	249	140	82
Cxcl1	249	258	579	2020	107	26	46	72	1157	251	278	588	768	72	530
Cxcl10	21	17	38	180	57	16	25	8	39	49	38	418	1241	59	133
Cxcl11	42	27	22	34	46	69	100	24	25	53	57	43	99	104	33
Cxcl12	2110	595	350	3173	1824	3540	1935	1042	1411	2001	1796	989	4513	2999	1546
Cxcl13	2295	528	35	641	730	243	724	322	3433	1522	216	1055	448	99	285
Cxcl14	337	533	563	1572	835	350	335	137	280	325	206	1251	2930	474	255
Cxcl15	8	2	5	7	4	2	5	7	4	1	5	4	10	3	5
Cxcl16	163	107	175	597	223	151	122	96	433	482	287	676	928	207	287
Cxcl2	62	195	23	1068	79	8	38	62	432	131	110	268	453	25	170
Cxcl3	34	250	12	1206	76	5	142	182	921	104	59	420	597	19	192
Cxcl5	28	151	21	895	326	21	51	188	177	30	236	126	1127	72	110
Cxcl9	20	8	113	323	50	11	34	4	40	29	86	482	1403	28	276
Cxcr1	3	4	5	8	3	4	7	3	11	2	5	14	15	4	3
Cxcr2	55	69	29	268	49	36	48	32	94	33	110	90	245	49	48
Cxcr3	29	14	19	33	28	25	20	12	26	27	28	32	47	18	30
Cxcr4	59	77	62	329	75	58	77	58	219	97	130	187	541	89	66
Cxcr5	3	5	2	11	4	3	5	4	2	7	12	3	14	2	6
Cxcr6	18	27	27	111	30	50	30	47	43	73	72	53	67	31	52
Cybb	86	59	73	662	168	155	140	69	261	158	254	367	580	180	174
Cyfip2	77	79	65	191	140	240	111	62	79	104	146	68	256	206	126
Cyld	237	281	235	293	268	267	430	191	371	275	284	276	404	308	259
Ddx58	147	143	127	247	163	258	163	50	182	166	79	135	322	233	236
Ddx60	78	19	20	82	69	121	75	24	72	44	72	29	132	78	150
Defb1	982	1453	657	1488	1066	391	442	539	921	650	156	2251	758	467	1328
Dll4	225	230	67	186	150	251	334	80	185	138	110	126	210	199	152
Dmbt1	41	994	23371	4	31925	4	207	7573	8	5	11459	6108	3064	9773	159
Dock9	2170	1922	1155	1407	1222	1328	1459	627	1711	1248	634	1452	1524	1194	1394
Dpp4	67	36	55	111	74	152	128	76	54	82	74	60	90	132	165
Dusp4	291	179	89	107	177	88	167	56	739	115	46	366	263	218	101
Dusp6	1603	1816	4508	2197	821	661	1262	562	2266	2428	1572	2523	2464	946	939
Ebi3	24	12	18	46	14	31	17	18	26	39	40	24	48	24	14
Ecsit	553	760	383	541	742	738	904	238	424	535	459	401	447	516	385
Edc3	354	214	243	301	204	264	218	121	272	248	160	494	347	189	228
Eef1g	7580	8874	7563	11711	6784	8849	6153	3923	7291	8473	6993	12969	11416	7884	6624
Egfr	1122	990	781	1235	869	838	674	434	792	1151	293	1364	1005	530	707
Egr1	2353	1790	1154	2212	744	562	706	571	866	2196	460	1115	1748	559	678
Egr2	35	16	16	57	32	18	35	12	47	57	25	85	63	34	35
Egr3	259	93	166	155	121	111	121	76	225	243	75	302	172	106	73
Eif2b4	613	844	438	871	692	670	660	315	516	720	480	730	769	699	454
Elane	10	6	2	6	4	1	4	4	11	7	4	6	8	15	3
Elk1	90	81	73	82	66	72	81	31	88	75	46	84	87	66	46
Emr1	40	35	48	522	114	212	138	57	451	219	473	165	474	186	144
Eng	1006	800	551	1538	990	1405	1550	464	1053	1478	747	928	1758	1706	747
Entpd1	267	266	101	449	293	289	226	148	326	225	174	228	425	284	281
Eomes	10	30	9	13	15	15	2	8	22	8	5	32	30	26	9
Ep300	1731	1498	758	1197	1082	1137	1109	586	1237	1079	745	1454	1403	914	971
Epcam	545	773	486	562	819	411	291	345	785	822	440	1646	1320	185	574
Epsti1	7	1	10	7	12	4	4	3	9	8	3	8	16	7	3
Erbb2	3617	2901	2041	2233	1363	2664	1542	917	2187	2455	1143	2857	2204	1335	1811
Ets1	529	391	320	1067	332	793	744	229	740	807	565	683	1199	1030	620
Ewsr1	4871	5049	2847	3636	3435	2791	2124	1316	3043	3180	911	3879	3757	2210	2190
F12	7	3	3	8	3	5	1	3	4	11	5	5	9	7	7
F13a1	126	88	165	495	356	551	389	157	922	357	457	171	425	364	434
F2rl1	103	82	90	93	56	61	77	38	161	102	49	127	191	81	103
Fadd	62	71	102	120	67	83	73	36	82	116	81	184	120	106	83
Fap	235	87	45	215	236	291	121	64	103	97	93	37	267	233	160
Fas	680	236	99	283	266	206	239	140	323	172	45	195	330	192	164
Fasl	8	4	11	9	6	8	2	6	3	10	7	5	12	7	7
Fcer1a	42	51	44	177	59	65	36	76	92	42	26	32	80	41	27
Fcer1g	151	140	96	1012	228	197	205	105	838	296	348	514	825	264	194
Fcer2a	7	3	6	10	7	5	5	4	8	3	6	14	7	8	4
Fcgr1	27	21	26	189	58	63	44	23	96	63	116	184	260	86	50
Fcgr2b	183	176	117	1545	271	297	355	224	1263	332	544	643	1213	337	229
Fcgr3	46	44	46	392	67	67	89	37	466	93	191	188	338	97	76
Fcgr4	17	18	7	141	16	15	14	17	63	15	53	96	191	43	26
Fez1	45	35	35	104	76	110	97	17	89	56	26	17	114	86	89
Flt3	25	23	10	50	19	27	12	10	28	33	18	29	44	19	9
Flt3l	126	115	189	265	136	336	235	67	164	205	171	242	272	191	215
Fn1	866	695	848	7879	2238	4421	1889	730	8405	2796	3955	1853	6660	3214	3044
Fos	1812	897	747	2226	698	474	674	395	1057	2760	428	2967	2135	683	1001
Foxj1	7	5	6	9	6	7	6	4	4	5	7	5	12	4	5
Foxp3	14	5	11	54	14	17	9	10	20	40	19	18	46	13	16
Fpr2	25	61	9	235	48	17	29	17	168	54	67	292	322	45	40
Fut7	9	10	6	19	7	16	15	4	13	12	17	16	18	9	11
Fyn	804	1307	510	927	770	1084	702	329	723	800	479	459	931	699	562
G6pdx	6740	7516	3350	4001	3786	3358	1642	1617	3272	3123	2050	6215	4962	4098	2087
Gata3	10	10	16	42	22	34	37	13	20	35	27	317	31	40	27
Gbp2b	7	3	7	19	15	3	10	1	7	4	9	6	14	8	22
Gbp5	36	14	41	116	130	198	96	25	46	29	43	152	403	140	163
Gfi1	24	10	12	14	20	26	9	4	16	14	10	15	25	8	5
Glycam1	13	5	6	12	2	12	5	9	9	6	4	10	21	6	7
Gpi1	9297	12055	5772	8661	9699	9194	10695	5351	8480	8087	6217	9785	10008	8718	6734
Gpr183	13	18	24	84	29	35	32	20	14	58	57	43	79	37	46
Gpr44	34	18	15	20	26	24	27	29	29	30	18	17	24	18	16
Gtf3c1	823	1010	803	886	711	847	761	369	828	833	590	1730	1032	764	797
Gusb	188	219	241	526	272	273	217	93	530	238	256	421	551	301	242
Gzma	24	28	76	28	29	18	12	26	30	67	21	20	23	18	25
Gzmb	11	10	23	45	11	5	9	9	12	29	7	10	28	7	11
Gzmk	7	9	6	11	10	6	4	1	3	6	4	9	8	6	4
Gzmm	96	76	30	48	89	55	95	21	50	49	41	33	45	52	19
H2-Aa	341	597	657	3720	1799	2714	1008	536	501	2201	2739	1651	4460	2422	1774
H2-Ab1	589	823	1721	5735	2444	3554	1601	587	754	3103	2291	2172	5991	3341	2209
H2-D1	19405	6428	8650	13666	8037	7536	6996	4859	7479	8160	7561	11429	19445	5391	11506
H2-Dma	54	46	88	252	102	183	94	38	59	143	166	103	280	152	147
H2-DMb1	29	37	82	237	79	91	40	23	43	93	126	95	189	93	55
H2-DMb2	12	13	15	52	27	39	26	19	18	39	42	9	41	20	38
H2-Ea-ps	19	3	11	1	13	7	5	19	5	6	6	5	10	5	54
H2-Eb1	151	388	876	3065	1337	1970	1145	201	502	1949	2914	1334	3299	1933	819
H2-K1	5224	2777	5923	7015	3271	2813	3726	1142	3524	3960	2910	4956	9762	2093	3895
H2-M3	98	40	66	161	107	119	93	36	89	94	159	81	234	133	91
H2-Ob	15	7	16	28	22	24	17	9	8	15	30	12	16	25	12
H2-Q1	12	9	7	12	6	6	1	5	8	5	5	16	13	7	8
H2-Q10	38	47	23	157	74	27	43	15	41	20	65	31	182	42	45
H2-Q2	17	6	20	7	42	15	7	7	8	12	21	16	16	8	13
H2-T23	1108	1720	1539	2748	1773	2187	1959	391	1964	2037	962	2703	3484	1672	1088
H60a	20	11	8	10	22	24	6	8	6	10	6	19	14	7	17
Hamp	12	4	7	13	10	2	7	4	8	4	9	11	12	10	41
Havcr2	51	48	10	13	15	18	6	13	56	49	3	23	22	12	21
Hc	8	4	4	10	6	5	7	6	4	9	5	5	11	2	9
Hck	20	22	30	228	45	35	47	15	98	67	111	96	240	63	46
Hcst	33	25	21	73	27	17	25	30	67	31	54	35	69	13	28
Hdac3	887	936	577	790	702	675	577	322	699	827	484	926	911	635	497
Herc6	53	57	33	70	50	85	60	25	65	52	47	55	121	64	72
Hif1a	10861	9172	17130	19926	10341	3184	4591	4728	9006	10752	2345	24452	13386	6131	13842
Hmgb1	825	1018	842	1098	1234	1090	1122	710	1204	1352	836	1331	1391	1200	1009
Hprt	4477	5097	2603	3941	3065	3187	2144	1846	2329	3433	857	4467	4053	2240	2405
Hras	59	84	54	53	66	55	67	43	49	62	70	79	62	30	43
Hsd11b1	350	162	48	265	184	153	186	125	238	122	86	166	516	169	241
Hspb2	719	1070	542	876	1510	1618	1930	497	949	1030	1461	297	1185	1617	717
Icam1	252	309	227	500	287	229	216	128	244	350	226	311	607	207	287
Icam2	112	64	33	182	107	217	192	64	86	159	98	82	239	292	154
Icam4	20	24	15	26	32	60	22	7	18	18	25	13	22	28	14
Icos	54	43	29	126	53	30	24	38	29	97	36	68	120	34	57
Icosl	557	335	307	254	184	213	174	153	280	244	121	637	374	276	238
Ido1	10	3	4	7	16	13	7	7	14	6	6	8	18	12	7
Ifi27	1266	1181	1471	2123	1523	2870	2070	743	1411	1842	1666	1533	2544	1932	1658
Ifi35	320	335	332	501	406	489	455	215	443	450	209	366	652	472	488
Ifi44	25	43	35	64	71	140	110	21	56	81	46	57	275	146	349
Ifi44l	18	5	12	17	17	9	16	3	6	4	5	14	12	6	9
Ifih1	371	192	185	281	293	297	292	100	227	243	76	181	400	221	297
Ifit1	45	45	58	46	75	113	77	18	78	78	38	65	105	84	212
Ifit2	197	106	42	114	92	182	97	57	119	76	80	60	192	142	178
Ifit3	75	99	102	81	86	242	67	19	73	75	149	62	161	306	527
Ifitm1	269	293	184	782	285	196	212	204	563	274	608	424	942	254	254
Ifitm2	9598	7162	4422	11239	5233	4589	4603	3398	9128	6872	3885	10390	9066	4268	5269
Ifna1	45	8	16	14	25	21	18	7	19	9	8	12	13	15	13
Ifna2	6	5	4	6	8	6	10	4	3	5	4	8	6	11	1
Ifna4	18	7	19	8	19	14	12	9	9	10	7	19	13	15	5
Ifnar1	1214	1024	971	1531	840	1059	973	392	1479	1225	890	1560	1757	829	756
Ifnar2	239	180	126	298	214	195	145	99	255	225	86	239	358	204	182
Ifnb1	14	6	7	8	1	6	10	3	7	4	9	5	8	4	5
Ifng	15	6	7	5	17	12	8	10	12	9	8	6	16	10	13
Ifngr1	1448	871	332	1139	927	673	599	541	859	713	323	798	1172	741	753
Ifnl2	20	8	16	12	13	6	5	11	9	2	11	22	8	5	5
Igf1r	2465	2348	1414	1391	1383	1049	1882	679	2190	1229	1078	2675	1638	950	1055
Igf2r	1027	1214	819	1680	1120	1290	1431	530	1128	1194	771	1560	1922	1139	689
Igll1	18	9	6	9	10	5	10	7	11	10	5	4	18	3	5
Ikbkb	1044	1037	707	917	665	764	572	341	710	834	331	1174	976	636	637
Ikbke	279	265	395	566	190	375	274	97	431	281	318	480	564	188	277
Ikbkg	493	383	294	339	360	378	377	168	376	310	212	480	457	363	324
Ikzf1	12	19	24	88	42	23	20	14	42	24	40	20	55	18	31
Ikzf2	364	192	164	234	208	210	345	190	324	235	199	179	167	219	295
Il10	11	11	6	14	5	14	7	5	13	9	6	14	10	10	5
Il10ra	26	82	54	171	43	72	57	29	140	88	139	62	207	65	64
Il11	13	18	11	160	8	9	14	6	27	21	18	33	103	5	13
Il11ra1	209	96	87	286	195	321	168	97	132	239	270	96	210	291	170
Il12a	24	17	18	35	42	24	21	13	20	23	18	11	36	22	18
Il12b	10	18	10	19	45	13	11	11	5	14	10	9	51	4	23
Il12rb1	15	18	11	22	19	7	10	10	11	14	8	14	25	6	15
Il12rb2	48	22	27	45	23	34	11	16	4	14	33	14	235	14	17
Il13	13	4	5	16	10	8	6	6	11	7	17	11	6	8	2
Il13ra1	1216	903	914	2060	891	873	642	491	1311	1183	309	2191	1682	649	1339
Il13ra2	10	20	5	25	10	6	3	9	16	11	5	20	24	2	16
Il15	123	39	43	94	78	112	152	52	59	88	51	41	113	93	105
Il15ra	205	216	182	277	167	254	384	93	215	275	188	231	331	254	152
Il16	191	182	87	241	133	198	227	57	286	169	150	88	357	330	180
Il17a	58	12	3	54	20	7	7	24	18	48	27	8	13	6	36
Il17b	27	15	33	42	20	28	20	13	33	7	35	71	50	20	50
Il17f	67	21	15	25	23	12	13	18	20	49	44	19	34	10	57
Il17ra	422	463	207	529	378	241	164	160	348	320	192	475	486	217	232
Il17rb	53	29	28	34	39	60	30	20	26	28	31	69	52	38	23
Il18	542	674	1128	736	770	1073	422	353	804	959	271	551	724	423	524
Il18r1	51	29	26	78	70	42	34	30	31	44	37	52	77	40	48
Il18rap	32	39	20	101	37	14	9	19	51	27	43	35	94	12	18
Il19	53	32	280	636	90	9	28	16	91	54	84	113	111	11	208
Il1a	229	373	200	547	299	158	153	78	236	262	87	624	468	44	226
Il1b	132	551	74	5536	634	60	173	103	783	654	1377	714	3068	258	501
Il1r1	280	315	153	865	392	264	296	220	545	295	324	325	617	235	268
Il1r2	336	342	174	489	205	265	116	162	316	244	96	246	426	100	73
Il1rap	739	505	370	629	624	423	290	232	547	404	402	559	655	247	375
Il1rapl2	17	16	14	19	12	19	9	4	17	21	11	20	16	9	8
Il1rl1	54	73	37	796	61	71	56	51	606	80	167	97	1116	70	102
Il1rl2	425	509	453	728	401	461	280	250	469	571	130	453	690	237	390
Il1rn	1526	1827	959	1753	1250	529	493	744	1156	2303	265	3618	1724	364	1650
Il2	8	8	7	14	11	10	5	4	8	8	2	9	13	7	8
Il21	10	8	9	19	14	8	4	10	18	6	8	10	10	9	7
Il21r	8	10	9	65	22	17	13	3	27	25	32	31	69	23	14
Il22	44	18	11	23	16	13	7	10	12	19	5	27	24	15	10
Il22ra1	473	590	176	330	211	256	126	108	182	191	88	297	247	128	281
Il22ra2	50	24	21	20	15	16	8	27	40	18	16	55	21	10	15
Il23a	24	14	17	72	17	12	17	10	15	49	11	58	56	9	17
Il23r	27	20	14	40	27	28	26	31	25	27	15	34	45	20	21
Il24	22	20	16	860	20	10	17	20	462	16	50	214	396	9	107
Il25	22	9	8	10	10	8	7	7	12	14	8	9	17	8	9
Il27	10	9	9	14	8	5	6	2	7	2	7	21	12	8	6
Il2ra	16	24	37	110	31	27	31	25	30	48	44	50	143	39	64
Il2rb	85	48	65	256	80	33	65	57	71	127	176	115	200	45	118
Il2rg	26	26	25	208	56	51	44	23	121	65	139	99	179	74	64
Il3	13	2	4	12	5	8	3	3	5	8	7	6	7	6	7
Il34	837	1139	460	833	546	764	453	323	1021	785	440	361	775	465	429
Il3ra	91	47	129	190	95	106	120	43	287	123	142	132	222	133	123
Il4	10	5	6	19	8	9	1	9	10	12	10	9	10	5	6
Il4ra	1013	1030	549	2578	767	275	531	292	1875	673	589	2681	1624	524	1129
Il5	27	13	20	15	16	40	14	7	16	19	23	29	27	25	25
Il5ra	12	8	3	23	5	8	8	4	16	5	7	8	8	6	10
Il6	12	5	8	230	16	5	9	3	85	11	22	12	171	9	8
Il6ra	1589	1171	536	867	667	822	799	683	1257	842	831	995	910	468	585
Il6st	1004	969	521	1560	965	1162	1215	429	1151	1040	712	821	1408	1054	960
Il7	20	21	18	60	37	46	28	15	19	20	34	28	48	48	48
Il7r	39	48	58	351	67	79	114	81	158	199	112	214	310	80	123
Il9	9	11	3	7	4	6	5	4	8	5	5	12	8	1	6
Ilf3	508	612	387	451	370	444	337	256	531	498	200	640	536	431	397
Inpp5d	94	105	32	176	75	56	75	42	136	86	101	113	158	64	73
Irak1	675	636	406	620	510	551	461	251	531	581	586	606	589	583	447
Irak2	744	566	246	558	506	531	401	155	508	435	289	373	685	300	353
Irak3	505	336	96	286	258	193	156	117	329	285	146	195	248	192	149
Irak4	364	259	341	608	244	324	239	148	361	314	105	594	539	315	270
Irf1	470	258	440	1005	471	504	517	119	566	345	172	932	1790	559	600
Irf2	354	257	316	586	271	430	397	186	500	405	191	530	550	400	342
Irf3	514	450	812	1010	493	1064	881	300	932	1057	499	1442	1060	851	761
Irf4	56	13	17	87	32	35	48	16	49	31	98	36	56	39	37
Irf5	263	254	197	626	241	397	237	162	380	422	336	618	527	272	284
Irf7	44	55	58	117	107	131	137	44	76	126	121	85	251	176	390
Irf8	74	63	41	169	114	65	43	34	116	70	101	105	220	72	77
Irgm2	59	25	47	115	91	106	79	37	73	51	71	123	254	73	145
Isg15	20	18	41	54	20	85	152	31	59	196	25	39	164	59	264
Isg20	244	174	347	274	528	270	200	248	375	257	193	474	340	436	196
Itch	2473	2075	1396	2298	1596	1797	1498	875	1740	1830	1293	2167	2015	1435	1643
Itga1	579	499	547	1014	599	733	877	286	595	575	536	588	1427	839	446
Itga2	70	161	109	230	83	113	88	73	217	177	58	686	283	74	139
Itga2b	163	101	69	123	108	119	74	73	101	191	63	122	107	44	107
Itga4	31	16	35	153	80	84	87	11	97	75	71	76	188	88	48
Itga5	233	255	84	379	133	131	158	82	691	251	87	547	388	141	152
Itga6	3459	2808	5105	5984	2037	1671	2434	1185	4929	4266	1040	16242	6816	2572	4453
Itgae	32	40	48	108	54	62	41	42	42	113	45	74	112	32	83
Itgal	51	49	39	224	90	59	49	38	83	83	94	116	286	54	85
Itgam	66	124	186	751	197	152	140	83	803	212	261	349	607	165	156
Itgax	19	13	32	148	37	33	33	13	26	39	43	66	129	64	35
Itgb1	3917	3881	2645	5677	3439	3418	3582	1815	6944	3909	4054	5771	5903	3747	3346
Itgb2	82	106	91	1064	202	157	170	55	432	181	586	412	733	191	152
Itgb3	142	71	48	191	60	96	110	55	285	142	101	178	220	115	113
Itgb4	2778	3193	4391	2970	1956	1867	1791	1071	3049	3155	779	7470	4201	1944	3815
Itk	14	6	9	26	3	13	5	8	14	17	9	21	17	4	10
Jak1	1926	1580	1182	2064	1670	1368	1358	769	1366	1578	1177	2420	2183	1301	1687
Jak2	1709	1418	628	1168	1135	920	846	418	981	925	415	1215	1517	855	664
Jak3	238	153	129	333	170	233	304	114	290	235	292	171	334	271	212
Jam3	261	194	79	314	293	401	366	114	296	235	177	89	391	432	315
Jun	1475	1070	804	1217	796	997	971	616	1267	1489	544	1437	1322	956	1162
Kdr	349	268	153	429	307	663	731	181	262	431	246	192	545	807	295
Kit	38	56	38	98	73	55	61	45	72	76	73	32	83	43	83
Klra1	6	9	8	11	10	14	4	5	8	8	11	7	16	4	6
Klra15	13	8	9	6	9	8	1	8	8	3	3	6	5	5	8
Klra17	38	36	12	48	18	28	7	10	30	13	18	7	33	24	11
Klra2	18	14	19	106	27	9	11	12	38	31	19	80	116	24	34
Klra20	20	8	11	4	16	16	6	10	6	9	6	10	20	6	12
Klra21	11	12	16	16	9	15	9	8	6	13	8	23	16	10	16
Klra27	8	8	4	8	10	5	4	4	30	5	8	24	15	8	7
Klra3	5	4	4	6	6	8	6	2	6	1	2	5	13	3	5
Klra4	41	23	19	26	19	21	10	5	65	16	18	64	21	18	16
Klra5	11	6	5	5	13	14	7	5	12	11	4	10	14	9	7
Klra6	26	9	12	10	28	14	7	11	22	12	7	22	18	12	12
Klra7	7	2	3	1	8	11	10	1	8	1	5	1	1	1	1
Klrb1	13	13	13	4	16	10	10	5	8	5	10	12	11	12	10
Klrb1c	13	4	11	17	8	8	10	6	7	14	8	13	8	5	7
Klrc1	26	8	16	28	23	14	7	8	13	19	15	24	24	9	24
Klrc2	4	1	4	1	3	1	7	5	8	1	5	1	8	6	2
Klrd1	12	14	23	53	37	29	26	19	24	33	26	29	54	26	22
Klrg1	15	9	20	20	10	13	23	7	17	10	22	16	27	16	19
Klrk1	13	3	11	32	36	19	11	12	22	36	17	26	57	25	33
Lag3	63	23	28	49	29	22	17	16	32	34	19	44	45	19	30
Lamp1	9830	10578	6478	9994	8750	8151	9574	4764	10311	8926	10538	10451	10412	8771	7505
Lamp2	5249	5379	3980	5524	4620	4993	4489	2451	4796	4532	2129	6101	6090	4067	3038
Lamp3	13	8	5	2	4	6	7	2	10	7	8	5	9	11	3
Lbp	220	138	54	426	222	169	118	112	228	130	131	196	519	244	136
Lck	14	17	43	81	28	23	30	16	19	59	28	53	89	14	42
Lcn2	1189	899	735	1938	970	126	333	500	1774	709	220	1570	1947	151	453
Lcp1	142	196	269	1823	468	346	324	173	737	529	1248	604	1759	478	489
Lgals3	13363	10822	2902	9802	5989	5969	3862	3116	6371	6356	1905	14041	10076	2833	4620
Lif	94	74	73	313	67	29	45	39	509	75	56	84	291	52	47
Lilra5	18	3	11	20	26	9	12	5	23	15	10	11	34	17	14
Litaf	878	590	454	1059	589	349	384	264	786	741	432	763	828	288	434
Lrp1	4893	2643	1426	6334	2346	3348	2401	1294	4859	2891	2263	4747	5488	2929	2407
Lrrn3	32	17	10	13	19	24	26	18	30	28	21	4	29	19	24
Lta	29	12	24	18	10	14	11	12	12	17	8	14	27	8	15
Ltb	8	12	8	68	16	25	29	19	9	27	44	25	62	27	35
Ltbr	1196	1103	823	1207	744	561	540	396	923	803	399	1262	1101	415	737
Ltf	19	7	15	16	23	12	11	10	7	13	19	6	9	8	6
Ltk	23	7	10	12	11	22	5	6	8	16	9	10	10	14	16
Ly86	32	23	26	224	67	117	41	32	104	107	123	97	212	104	92
Ly9	12	7	11	62	20	18	20	9	26	17	26	28	42	23	22
Ly96	345	254	182	290	282	222	196	96	220	235	128	343	282	191	168
Lyn	207	209	189	551	323	268	256	144	519	331	304	378	634	325	253
Lyve1	294	198	68	505	304	375	323	191	323	238	89	279	372	322	242
Lyz2	1651	2217	1412	31497	7270	4383	5733	1922	12784	5009	10818	8682	19996	6005	4280
Maf	530	542	433	795	389	606	405	192	676	661	152	760	723	437	280
Map2k1	1294	966	919	1176	924	1028	1079	557	1224	1175	947	1791	1318	1012	1106
Map2k2	1808	2660	1954	2717	2047	2396	2040	987	2561	2502	1826	2594	2495	2044	1707
Map2k4	873	1066	748	981	719	761	665	425	825	1066	706	1094	1149	694	589
Map3k1	1033	622	845	982	556	972	696	448	680	714	524	1175	877	623	660
Map3k5	528	558	520	527	509	352	360	180	288	445	232	661	563	417	301
Map3k7	1180	1512	894	1250	1082	1072	714	556	1009	1063	893	1391	1436	885	877
Map4k2	298	229	223	254	165	275	248	99	254	208	95	213	322	219	186
Mapk1	1692	1321	1069	1490	1470	1297	1257	785	1066	1122	1012	1909	1653	1237	1218
Mapk11	57	59	68	157	67	98	98	39	175	99	113	115	165	101	119
Mapk14	3343	3810	2316	3118	2644	2389	1913	1108	2406	2503	1521	3231	3116	1900	1957
Mapk3	3251	2489	2212	2982	2101	2172	1865	927	3013	2410	1060	3214	2817	1600	1356
Mapk8	660	663	300	464	555	512	452	207	390	460	238	381	536	487	295
Mapkapk2	1423	1983	993	2041	2015	1715	2189	751	1546	1403	2017	1573	2213	1797	1324
Marco	15	6	9	18	18	8	2	3	11	19	9	52	17	6	7
Masp1	262	315	132	601	309	303	247	287	369	340	194	222	686	323	152
Masp2	15	6	7	12	11	10	19	3	6	19	15	10	14	11	16
Mavs	590	460	517	917	550	864	872	293	578	669	889	770	828	898	590
Mbl2	9	4	8	8	7	8	6	2	10	10	11	5	8	5	1
Mcam	558	471	188	762	481	361	454	159	572	559	335	377	915	513	505
Mef2c	1218	2731	1421	3101	4828	5689	5501	1863	1855	3205	2133	935	4829	5520	2409
Mefv	10	12	12	92	28	12	17	8	39	43	27	56	133	30	22
Mertk	239	198	59	189	185	102	117	79	332	99	65	132	189	100	112
Mfge8	417	403	285	587	611	407	393	156	422	431	254	522	508	392	321
Mif	12450	10705	11422	12409	7453	7150	5717	4703	11087	9859	5906	21073	11150	7430	8464
Mill2	111	59	70	132	114	209	192	57	118	94	110	32	152	172	137
Mme	359	201	85	299	383	429	358	192	216	311	463	117	478	225	326
Mmp9	73	284	12	425	66	27	47	67	304	36	84	1094	521	41	119
Mnx1	5	2	7	10	9	10	7	4	8	4	7	7	14	7	5
Mpo	10	15	8	11	10	7	9	14	9	15	7	10	17	24	8
Mpped1	8	4	3	6	6	6	11	6	9	3	4	9	12	1	3
Mr1	446	260	146	286	373	399	364	198	283	220	165	218	349	318	254
Mrc1	189	126	108	1156	305	492	334	245	2064	407	719	307	538	415	408
Ms4a1	20	7	10	37	20	17	12	5	8	16	8	23	20	8	16
Ms4a2	19	24	18	48	23	23	20	21	28	26	14	17	46	19	27
Msln	61	67	398	64	1044	40	36	238	59	36	369	164	137	215	32
Msr1	21	29	16	239	65	43	44	20	271	70	70	167	230	57	47
Mst1r	435	346	398	426	247	268	217	108	269	335	162	612	348	193	221
Muc1	50	37	35	78	51	35	75	22	68	48	45	57	68	41	190
Mx1	13	6	8	13	12	3	7	4	10	13	6	10	17	2	13
Mx2	24	30	33	17	25	59	47	10	34	23	41	18	37	48	39
Myc	1769	1780	906	1207	849	658	460	502	1030	1187	180	1849	1052	545	740
Myd88	431	516	468	755	347	286	258	185	429	546	463	676	649	305	415
Ncam1	235	250	96	202	358	234	228	56	439	144	67	169	295	119	159
Ncf4	56	59	45	445	99	106	99	44	203	104	148	180	437	103	115
Ncr1	9	10	6	14	3	4	5	4	7	4	2	3	5	5	12
Nefl	22	637	12	19	12	12	10	9	9	10	12	24	19	16	12
Nfatc1	258	289	157	296	295	280	402	112	291	329	165	236	401	332	206
Nfatc2	177	193	153	377	229	491	407	79	370	309	152	110	320	301	255
Nfatc3	434	539	296	471	350	366	334	206	376	452	227	612	484	383	341
Nfatc4	230	254	163	427	222	335	419	131	586	458	323	274	622	334	229
Nfkb1	1171	1018	857	1362	913	690	860	427	902	1275	693	1703	1370	747	654
Nfkb2	537	390	401	1126	486	510	708	223	891	831	580	1200	1615	615	422
Nfkbia	2070	2543	1196	1928	1318	747	813	677	2014	2136	800	2128	2041	823	1241
Nlrc5	470	151	875	753	229	253	324	120	308	414	195	517	1119	199	451
Nlrp3	31	68	7	369	42	9	28	23	94	103	56	105	215	33	49
Nod1	638	428	378	753	441	695	701	244	632	478	807	397	697	573	497
Nod2	242	231	535	437	179	136	205	94	238	657	210	771	495	187	302
Nos2	13	13	8	29	10	27	20	9	38	17	25	25	45	29	11
Notch1	2353	2039	1515	1605	1217	2199	1245	756	1349	1579	999	1764	1896	1137	1208
Nrp1	467	464	295	1024	727	1358	988	366	667	704	542	362	1387	1349	642
Nt5e	305	150	261	157	107	142	193	130	227	163	71	371	300	180	338
Nubp1	409	581	413	550	340	328	225	189	400	443	247	680	571	305	331
Nup107	763	778	413	606	575	440	355	187	438	525	230	717	703	353	405
Oas2	55	42	43	119	77	203	177	35	122	156	55	54	204	153	296
Oas3	18	17	15	27	27	33	43	15	37	56	29	21	64	31	111
Oasl1	61	67	32	237	94	137	132	69	150	110	88	82	346	90	168
Oaz1	5998	9604	4338	7195	7353	7018	6569	3693	6529	7175	8887	7542	7495	7496	6024
Osm	43	60	8	378	46	16	25	17	94	47	78	43	126	24	38
Pax5	5	8	8	12	12	10	7	7	6	4	6	15	14	11	6
Pdcd1	23	12	9	89	17	14	24	33	44	44	47	51	50	9	32
Pdcd1lg2	29	19	19	61	19	16	20	12	15	17	50	13	29	13	30
Pdgfc	81	94	246	204	184	148	169	146	266	105	152	380	158	150	241
Pdgfrb	405	406	133	441	438	347	352	228	484	226	344	178	535	342	284
Pecam1	2137	1433	454	1339	1359	1466	1647	659	1310	1078	582	745	1820	1669	1087
Pik3cd	43	50	20	174	65	77	70	33	95	64	130	62	144	108	82
Pik3cg	23	37	26	123	47	33	36	28	72	41	39	48	109	48	38
Pin1	235	255	188	170	187	151	155	71	156	186	82	268	218	154	130
Pla2g1b	15	12	9	10	11	7	3	1	12	7	5	11	13	7	5
Pla2g6	267	289	199	242	220	290	274	126	267	193	204	215	253	271	198
Plau	867	2036	763	2878	1672	587	494	521	2112	1204	1328	2994	1992	789	1424
Plaur	537	472	97	1731	282	119	259	120	1894	619	300	834	1011	178	289
Pmch	5	8	5	4	7	11	6	3	6	4	1	6	12	6	4
Pml	288	353	552	543	295	460	428	156	498	371	264	754	673	443	383
Pnma1	28	84	39	50	39	35	45	22	49	62	22	54	51	33	28
Polr1b	290	407	242	302	239	179	155	128	166	315	133	380	202	161	194
Polr2a	1556	1351	689	1120	1031	981	680	522	1105	936	305	1391	1474	850	711
Pou2af1	20	5	11	88	8	15	6	10	10	8	20	20	26	11	11
Pou2f2	24	10	14	107	38	31	25	6	51	40	36	47	99	47	29
Pparg	74	55	40	57	47	33	68	30	40	93	37	47	48	70	24
Ppbp	39	309	15	1289	114	62	182	386	688	429	181	252	827	97	271
Ppia	20460	21310	17551	26873	16437	12909	10605	8392	20401	19518	8849	38270	25206	13617	17774
Prdm1	883	1415	890	1257	788	698	438	298	841	909	256	846	877	345	470
Prf1	3	4	8	10	8	3	5	6	9	8	9	8	15	3	3
Prg2	11	8	6	13	11	12	9	8	6	8	4	7	16	4	4
Prkcd	2895	2682	1601	2651	1758	1621	1257	758	1981	1795	1533	3117	2491	1159	1518
Prkce	302	339	193	254	304	311	293	120	235	289	322	280	345	276	259
Psen1	1924	2061	1377	1985	1491	1490	1017	767	1651	1533	903	2538	1832	1139	1187
Psen2	423	237	99	234	210	167	204	94	246	171	171	158	276	173	141
Psma2	4473	4277	2076	3707	2889	2647	1918	1308	2407	2789	860	4066	3688	2685	2269
Psmb10	94	87	79	211	138	140	124	43	125	124	90	154	321	170	153
Psmb7	1834	2254	837	1867	1789	1835	1381	922	1215	1639	739	1727	2053	1891	1358
Psmb8	709	329	1233	1593	729	740	755	210	691	844	506	998	3078	712	1006
Psmb9	182	60	181	313	195	229	240	76	164	164	205	211	604	150	311
Psmd7	3926	6456	4098	5755	4975	5256	4524	2339	4470	4845	3634	5358	5453	4499	3052
Ptgdr2	57	16	9	10	28	18	3	8	13	12	3	9	11	8	9
Ptgs2	71	504	47	2676	165	44	127	70	1704	891	130	1564	1158	534	554
Ptprc	64	73	57	806	143	129	119	60	250	212	316	255	686	191	193
Pvr	275	215	139	269	176	147	183	60	416	264	161	262	315	211	179
Pvrl2	371	235	168	414	205	244	283	97	412	396	103	366	352	166	159
Pycard	88	74	101	148	66	173	106	73	112	124	51	141	123	98	110
Raet1	80	31	30	29	49	22	21	15	99	34	7	34	45	35	27
Rag1	15	6	17	15	15	9	12	8	7	10	11	17	17	8	6
Rel	402	388	279	323	396	300	281	130	274	421	202	494	363	230	249
Rela	1009	910	605	1162	619	589	586	306	833	810	287	1088	1125	543	529
Relb	239	220	231	564	307	199	257	82	419	397	329	585	619	225	270
Reps1	1214	1080	589	724	832	643	509	278	601	663	305	937	807	454	413
Ripk2	227	230	130	216	209	207	169	100	217	191	120	194	217	161	154
Rora	1290	1501	945	1343	1122	1408	1025	753	1693	1245	800	1229	1176	1268	1025
Rorc	4018	2411	707	535	2105	1939	3469	1167	1200	834	692	461	1253	1281	655
Rpl19	29485	30268	17574	20254	19810	19366	15646	11139	20501	21613	9011	32542	21657	16084	13595
Rps6	266	397	344	392	348	289	293	273	398	400	665	480	371	249	443
Rrad	51	41	23	215	104	91	133	26	94	96	607	115	159	206	77
Rsad2	37	33	19	25	42	94	38	41	36	42	44	40	82	60	58
Runx1	396	527	636	912	465	382	316	283	836	397	585	1545	1060	320	434
Runx3	18	25	15	59	22	15	17	14	65	31	33	47	62	15	19
S100a8	44094	30128	30171	38236	38142	662	13959	17759	11101	26553	5124	41395	27737	1227	31068
S100b	40	9	20	18	57	34	56	18	47	38	43	12	64	48	81
Saa1	17	38	16	153	145	52	44	25	78	55	137	152	232	33	12
Sap130	640	563	374	581	437	426	370	175	475	519	177	653	533	349	314
Sbno2	1117	1386	1200	2504	1018	732	818	373	1289	1239	528	1452	1612	635	680
Sdha	2216	4571	1886	4023	4760	5254	6099	2638	3227	3642	3625	1970	4363	5912	2996
Sele	47	34	19	294	84	59	74	65	68	140	184	86	381	94	90
Sell	20	39	14	362	70	12	35	33	87	40	83	66	214	41	26
Selplg	58	104	97	803	146	170	140	98	226	233	408	249	670	187	204
Serpinb2	1277	2496	1735	3743	1347	723	711	865	2134	2812	233	1844	3060	345	2118
Serping1	2163	1349	477	2814	1874	2209	1801	1188	1838	1869	2216	1134	3155	1848	1578
Sf3a3	1289	929	566	924	644	561	492	305	660	752	273	1097	877	604	816
Sh2b2	80	55	67	121	35	39	47	17	92	68	23	202	114	40	46
Sh2d1a	8	11	12	12	14	7	7	12	14	8	8	14	20	11	12
Sh2d1b1	28	6	11	26	18	20	14	7	10	22	18	9	35	13	12
Sigirr	95	62	52	112	81	122	136	57	113	63	81	95	140	121	94
Siglec1	44	11	22	121	36	96	49	24	251	54	100	35	69	50	47
Slamf1	12	7	10	31	21	20	26	12	16	30	29	11	19	16	14
Slamf6	11	3	5	13	8	5	6	9	8	12	13	18	20	5	9
Slamf7	14	6	14	53	19	37	20	15	12	16	25	26	99	30	16
Slc11a1	44	39	17	240	51	35	30	15	105	48	91	112	198	42	43
Slc7a11	653	2687	344	470	781	504	121	211	313	512	231	574	838	1524	155
Smad2	488	444	254	367	325	288	254	187	293	293	210	492	454	269	367
Smad3	1141	1190	416	743	862	704	1123	410	966	701	437	937	773	695	465
Smad4	1478	1466	651	929	1077	804	950	637	996	913	619	1208	1087	801	811
Smn1	1192	1078	500	840	731	515	418	340	502	704	205	1070	836	461	546
Smpd3	1304	2548	2734	3357	1800	1483	1023	897	2494	2859	1405	1378	1832	1252	1085
Snai1	37	67	26	117	66	47	64	34	114	39	107	72	89	57	44
Socs1	89	167	102	295	151	74	68	60	125	128	170	236	238	82	149
Socs3	320	426	235	1314	356	195	352	134	1022	415	305	638	678	266	394
Spink5	941	1369	705	1104	835	880	374	340	791	916	193	1145	1138	1305	420
Spn	21	28	40	119	33	42	34	22	39	84	52	67	130	41	61
Spp1	195	278	117	1881	247	34	110	39	3517	121	333	944	2164	259	71
St6gal1	127	114	74	169	106	166	148	61	202	160	186	71	241	158	141
Stat1	242	202	356	703	465	519	604	150	332	386	402	651	1451	532	729
Stat2	273	215	177	373	359	355	234	110	283	235	135	304	615	304	357
Stat3	3919	4140	2556	4813	2843	2493	2649	1296	3864	3602	1388	4434	4486	2288	2376
Stat4	14	5	5	13	13	7	5	3	20	7	17	12	19	12	12
Stat5b	440	374	298	536	379	483	510	224	399	374	658	387	509	431	411
Stat6	2543	1743	1839	2595	1248	1962	1520	1055	2112	2144	1531	3707	2689	1472	1612
Syk	222	153	128	604	232	198	254	82	402	204	281	312	490	283	198
Syt17	30	20	10	19	15	20	13	6	35	20	13	26	33	14	12
Tab1	812	686	473	722	732	724	678	257	528	533	397	571	759	551	439
Tal1	94	47	35	95	60	79	94	34	67	52	50	44	81	83	61
Tank	841	768	478	705	626	639	522	310	635	575	220	727	719	473	361
Tap1	993	333	647	888	745	650	529	176	476	492	362	712	1907	352	733
Tap2	449	212	302	462	305	289	380	154	295	304	319	294	659	271	358
Tapbp	1713	1336	1234	1731	1202	1310	1039	425	1237	1491	727	1874	2577	1199	1283
Tbk1	491	413	316	462	372	318	261	143	336	320	199	447	446	321	264
Tbp	174	143	169	205	91	207	183	113	182	251	198	333	246	157	188
Tbx21	16	6	17	24	27	33	21	6	17	10	12	16	21	14	18
Tcf7	122	254	235	215	190	130	96	45	119	153	126	197	241	92	112
Tdo2	20	9	5	12	11	9	10	7	9	11	7	22	13	7	7
Tek	499	370	152	585	551	816	781	174	336	365	284	196	682	675	396
Tfe3	556	677	386	593	381	373	322	191	485	514	294	822	500	393	341
Tfeb	658	780	387	532	796	858	1024	340	603	694	421	394	721	841	480
Tfrc	2500	2377	1330	3264	1759	1762	1234	1999	1152	2673	1033	2613	2155	1564	1407
Tgfb1	919	837	995	1432	678	633	748	383	1466	988	609	2646	1621	677	779
Tgfb2	157	188	162	172	249	206	121	95	145	164	76	337	232	176	206
Tgfb3	313	223	180	536	388	529	389	152	309	464	438	369	477	564	402
Tgfbr1	738	1281	709	981	820	713	865	478	853	824	880	1044	1347	687	865
Tgfbr2	2142	2279	2026	3469	2259	2125	2343	1085	2881	2090	1356	2098	3064	2642	1667
Thbd	1343	1659	842	2241	1005	2402	1485	962	1404	2241	1563	2349	2483	1269	1566
Thbs1	319	963	323	1507	919	341	535	383	4065	1360	397	1958	2305	700	466
Thy1	260	149	158	1259	259	752	343	196	727	477	350	590	1231	964	471
Ticam1	143	106	126	199	125	148	195	63	152	188	136	161	145	123	112
Ticam2	10	8	13	64	20	27	24	5	37	26	30	24	47	37	17
Tie1	652	446	148	388	363	572	447	206	421	341	190	228	514	574	401
Tigit	31	24	24	42	42	14	12	11	22	21	14	27	46	18	21
Timd4	18	7	12	52	34	87	58	12	15	37	30	20	110	51	43
Tirap	182	206	143	200	161	128	110	87	133	147	96	235	204	156	100
Tlr1	13	16	15	106	28	14	20	9	37	22	69	45	97	30	37
Tlr2	47	82	37	233	77	119	73	35	157	118	205	129	337	141	88
Tlr3	49	38	60	90	47	79	52	29	55	43	55	45	118	56	65
Tlr4	418	429	233	584	393	298	272	198	392	293	259	272	427	279	271
Tlr5	28	25	22	66	29	43	34	15	53	32	43	33	44	35	30
Tlr6	21	15	19	70	27	25	18	16	44	26	32	31	79	30	22
Tlr7	14	29	15	63	16	30	31	24	95	39	26	30	66	26	23
Tlr8	52	31	27	214	55	61	54	24	245	66	76	103	163	79	62
Tlr9	26	14	14	42	26	29	15	16	36	48	25	35	59	17	19
Tmed1	268	400	265	421	313	469	573	193	498	419	319	326	448	453	313
Tmem173	21	26	28	197	39	68	51	33	92	74	121	61	130	77	39
Tnf	30	46	25	130	43	17	31	18	58	48	80	140	154	23	45
Tnfaip3	403	205	136	548	189	83	135	71	250	331	99	335	448	95	223
Tnfrsf10b	320	206	112	135	199	126	79	55	116	145	77	177	158	105	81
Tnfrsf11a	65	41	35	146	117	70	58	31	111	85	100	85	148	79	66
Tnfrsf11b	9	7	10	12	18	22	7	1	20	6	10	15	31	18	16
Tnfrsf12a	453	1121	678	1170	611	305	444	252	1122	917	274	1898	1601	595	461
Tnfrsf13b	11	7	9	41	10	23	17	10	27	10	46	14	41	17	18
Tnfrsf13c	15	17	11	24	11	27	9	8	10	11	9	11	14	7	14
Tnfrsf14	93	58	70	250	89	151	141	47	144	135	244	119	329	170	166
Tnfrsf17	24	3	5	16	8	23	14	10	3	15	15	12	18	12	19
Tnfrsf18	19	25	68	51	15	15	16	23	34	72	50	59	64	26	49
Tnfrsf1a	3261	3681	2828	4173	2269	2180	2177	1485	3262	3480	1502	4170	3748	1863	2171
Tnfrsf1b	148	186	107	928	279	204	287	136	570	300	792	445	721	270	248
Tnfrsf4	61	67	28	64	78	30	29	21	40	57	23	48	58	25	53
Tnfrsf8	11	8	9	13	5	8	4	7	9	9	4	16	9	5	13
Tnfrsf9	22	15	8	26	9	8	6	11	72	11	13	12	20	11	15
Tnfsf10	23	16	31	64	69	136	110	19	36	35	117	44	128	94	82
Tnfsf11	14	15	7	110	19	13	13	8	232	10	23	34	97	7	9
Tnfsf12	112	77	96	326	152	334	284	82	244	189	268	158	374	280	220
Tnfsf13	77	55	72	99	34	135	148	36	131	104	111	74	93	78	93
Tnfsf13b	20	14	9	48	22	10	9	10	26	12	19	20	71	17	17
Tnfsf14	26	20	13	71	19	27	17	11	39	21	36	16	46	11	20
Tnfsf15	11	8	9	10	7	12	6	5	12	9	8	10	13	16	9
Tnfsf18	21	14	16	14	17	13	15	9	9	10	16	13	12	9	9
Tnfsf4	6	4	14	22	5	38	9	7	10	25	8	8	21	10	8
Tnfsf8	12	7	13	23	15	10	8	5	14	12	13	24	12	3	10
Tollip	2197	1905	949	1607	1277	1236	1138	670	1306	1464	679	1836	1426	1063	1119
Tpsab1	243	39	18	66	348	165	139	25	47	34	30	198	269	125	72
Traf2	496	490	480	791	359	528	479	211	605	606	400	863	734	520	443
Traf3	360	397	303	500	350	256	190	126	286	290	232	590	507	284	206
Traf6	1308	2247	687	908	1256	752	502	393	746	946	280	1062	988	611	440
Trem1	27	59	13	309	54	20	18	22	60	21	87	62	130	17	22
Trem2	30	16	21	156	38	29	32	12	66	15	87	78	147	37	27
Trp53	343	895	508	574	447	792	656	288	931	1068	1102	814	668	677	715
Tubb5	1048	1918	3894	3830	1837	1796	1978	1080	6278	2785	3976	4708	3506	1754	2419
Twist1	150	147	57	287	218	163	82	88	295	160	49	107	319	114	109
Txk	11	7	2	20	1	15	7	7	10	11	7	4	18	11	8
Txnip	9930	5915	2160	3428	7212	4130	3438	5996	3909	4609	2618	1358	5416	5150	4730
Tyk2	286	200	248	283	165	239	232	95	242	215	337	341	293	190	179
Ubc	20220	31644	15763	18435	23336	19161	19279	9475	19840	16345	6272	22231	20882	19284	12338
Ulbp1	16	19	50	26	18	25	14	8	71	34	15	12	12	19	26
Usp18	47	18	30	39	31	98	69	26	58	54	52	32	73	75	153
Usp9y	7	6	10	6	10	6	4	3	6	7	10	5	8	6	4
Vcam1	33	21	38	127	38	53	50	38	295	53	41	84	141	52	60
Vegfa	3440	2128	2491	2695	1929	3463	3687	1361	2112	3544	3053	3619	2904	4665	2514
Vegfc	102	67	34	107	90	167	114	57	159	81	53	89	187	161	106
Vhl	343	306	218	235	223	157	211	119	226	220	236	353	241	171	228
Vim	3749	2570	2784	8769	4509	8040	6988	1843	8432	5783	8889	5159	12682	7266	6167
Vwf	447	216	187	603	392	680	696	443	619	724	339	399	752	767	640
Xaf1	138	99	180	308	280	556	326	80	183	273	162	194	643	400	426
Xbp1	1921	2478	2338	3954	2551	2052	2404	1189	2299	2821	1301	2962	2763	1851	1326
Xcl1	6	4	10	12	4	9	6	7	10	9	7	5	17	7	13
Xcr1	25	15	8	9	16	13	10	4	14	10	5	18	17	8	14
Ythdf2	1166	1553	685	902	694	650	657	526	709	906	382	1328	899	656	884
Yy1	1871	1864	937	1395	1217	1190	977	645	1158	1352	377	2210	1499	1073	1134
Zap70	22	25	13	45	33	23	8	21	15	23	15	29	39	15	26
Zbp1	22	23	40	156	64	74	60	22	54	73	55	82	341	94	166
Zfp13	103	50	47	80	66	69	76	36	64	65	44	28	59	59	50
