# Supplementary material for: Epithelial Mutant p53 Promotes Resistance to Anti-PD-1-Mediated Oral Cancer Immunoprevention in Carcinogen-Induced Mouse Models
Source: Cancers (Basel). 2021 Mar 23;13(6):1471. doi: 10.3390/cancers13061471 (PMC8005156; doi:10.3390/cancers13061471)
Supplement: Supplementary file 1 [file cancers-13-01471-s001.zip › Supplementary Table S3.xlsx]

## Sheet: Sheet1
Supplementary Table S3
Primers used for p53 sequencing
DNA sequencing
Target	Primer name	Primer sequence
Exon 2	mp53Int1-F	aagccataggggtttgtttg
	mp53Int2-R	gatacaggtatggcgggatg
Exon 3	mp53Int2-F	ggactgcagggtctcagaag
	mp53Int3-R	caagtccctttctgctctgg
Exon 4	mp53Int3-F	ggctggtaggctgagaacac
	mp53Int4-R	ctgaagaggaacccccaaat
Exon 5	mp53Int4-F	tagttccccaccttgacacc
	mp53Int5-R	ataagtcagaagccgggaga
Exon 6	mp53Int5-F	tcccggcttctgacttattc
	mp53Int6-R	gacgcacaaaccaaaacaaa
Exon 7	mp53Int6-F	gtagggagcgacttcacctg
	mp53Int7-R	cagaagctggggaagaaaca
Exon 8	mp53Int7-F	tgctggtccttttcttgtcc
	mp53Int8-R	gtgactttggggtgaagctc
Exon 9	mp53Int8-F	ttgagcttcaccccaaagtc
	mp53Int9-R	atgcgagagacagaggcaat
Exon 10	mp53Int9-F	tgtccagtgcttccatctca
	mp53Int10-R	ggagggaggtctgggtagag
Exon 11	mp53Int10-F	cctccccttttctgtcttcc
	mp53Ex11-R	GACCGGGAGGATTGTGTCT
RNA sequencing
Target	Primer name	Primer sequence
Exon 5 (codon 172)	mp53-904-F	CTCTCCTCCCCTCAATAAGC
	mp53-1085-R	CCATCACCATCGGAGCAG
