# Supplementary material for: Epithelial Mutant p53 Promotes Resistance to Anti-PD-1-Mediated Oral Cancer Immunoprevention in Carcinogen-Induced Mouse Models
Source: Cancers (Basel). 2021 Mar 23;13(6):1471. doi: 10.3390/cancers13061471 (PMC8005156; doi:10.3390/cancers13061471)
Supplement: Supplementary file 1 [file cancers-13-01471-s001.zip › Supplementary Table S4.xlsx]

## Sheet: Sheet1
Supplementary Table S4
Tumor kinetics, mouse survival and metastasis rates in mice with oral tumors with the indicated genotypes
		Median tumor appearance	Median survival	Metastasis rates
	p53-WT	32 weeks	>44 weeks	1/19 (5.2%)
	p53-LOF	23.5 weeks	35 weeks	1/21 (4.8%)
	p53-GOF	21 weeks	31 weeks	6/19 (31.6%) *
	(*) p<0.05 for p53-GOF vs p53-LOF and p53-GOF vs p53-WT
