# Supplementary material for: Epithelial Mutant p53 Promotes Resistance to Anti-PD-1-Mediated Oral Cancer Immunoprevention in Carcinogen-Induced Mouse Models
Source: Cancers (Basel). 2021 Mar 23;13(6):1471. doi: 10.3390/cancers13061471 (PMC8005156; doi:10.3390/cancers13061471)
Supplement: Supplementary file 1 [file cancers-13-01471-s001.zip › Supplementary Table S5.xlsx]

## Sheet: GOF vs LOF
Supplementary Table S5
Nanostring PanCancer Immune Profiling GOF vs LOF
	baseMean	log2FoldChange	lfcSE	stat	pvalue
Ctss	983.065	-1.59986	0.436993	-3.66106	0.000251177
Col1a1	2331.62	-1.83662	0.544711	-3.37174	0.00074695
Il6	29.8701	-2.5733	0.773091	-3.32858	0.000872901
Fcgr4	40.4519	-1.77867	0.537846	-3.30702	0.000942953
Col3a1	3685.81	-1.76487	0.553237	-3.19007	0.00142236
Dll4	175.5	0.974343	0.305797	3.18624	0.00144136
Cdh5	553.223	0.8876	0.278917	3.18231	0.00146107
Cxcl14	585.052	-1.32999	0.420181	-3.16528	0.00154935
Cd80	109.649	-1.21274	0.390222	-3.10783	0.00188469
Cxcl10	114.095	-2.27625	0.735245	-3.09591	0.00196207
Dmbt1	7344.86	-5.06602	1.67322	-3.0277	0.00246419
Clec5a	37.5195	-1.26295	0.418478	-3.01796	0.00254479
Cxcr4	122.047	-1.15777	0.392212	-2.95189	0.00315836
Runx1	571.502	-0.818339	0.281666	-2.90536	0.00366836
Cd22	9.42907	-1.39094	0.481422	-2.88922	0.00386196
Fcgr1	75.8807	-1.24098	0.433416	-2.86326	0.00419302
Gzmm	53.6906	1.11911	0.392991	2.84767	0.00440408
Klra2	31.6227	-1.18274	0.418154	-2.82848	0.00467697
Tie1	388.504	0.844097	0.298829	2.82468	0.00473276
Il1rl1	179.517	-1.86395	0.662373	-2.81405	0.00489214
Msln	219.218	-2.36663	0.842763	-2.80818	0.00498231
Cd84	152.785	-1.1466	0.4087	-2.80547	0.00502427
Irak2	425.784	0.615808	0.221707	2.77757	0.00547663
Trem2	45.9007	-1.2648	0.455542	-2.77646	0.00549542
Ecsit	543.463	0.815654	0.295141	2.76361	0.00571657
Sell	63.7534	-1.55084	0.564595	-2.74682	0.00601764
Pecam1	1232.37	0.806291	0.296877	2.71591	0.00660944
Pou2af1	15.8574	-1.2735	0.469258	-2.71385	0.00665059
Tfeb	643.003	0.773515	0.285476	2.70956	0.0067372
Slamf7	24.1467	-1.1201	0.419706	-2.66876	0.00761308
Csf3r	118.136	-1.52967	0.57419	-2.66405	0.00772058
Il11	24.2017	-1.41309	0.530817	-2.66211	0.00776532
Irak3	226.711	0.802591	0.301711	2.66013	0.00781106
Masp2	11.457	0.977678	0.368235	2.65504	0.00792988
Psen2	195.448	0.691403	0.261737	2.64159	0.00825177
Ccr5	93.1885	-1.67499	0.640115	-2.6167	0.00887831
Prkce	274.005	0.532467	0.204396	2.60508	0.00918536
Ccl28	33.1385	-1.8335	0.710878	-2.5792	0.00990296
Rorc	1592.52	1.35936	0.527489	2.57704	0.00996506
Il6st	966.007	0.443468	0.172497	2.57087	0.0101443
Cybb	197.152	-0.999443	0.392249	-2.54798	0.0108348
Nfatc1	264.452	0.588315	0.231948	2.53641	0.0111996
C3ar1	284.431	-1.21393	0.479351	-2.53245	0.011327
Cxcl5	198.807	-2.10299	0.832291	-2.52675	0.0115125
Itgam	251.08	-1.06228	0.423116	-2.5106	0.0120525
Itgax	42.9559	-1.02646	0.409519	-2.5065	0.0121932
Tlr6	29.0633	-0.736619	0.29637	-2.48547	0.012938
Dock9	1351.34	0.58512	0.236591	2.47312	0.0133937
Ccr1	124.666	-1.16228	0.472043	-2.46222	0.0138078
Itgb2	266.462	-1.1958	0.485948	-2.46076	0.0138643
Smad3	768.36	0.689289	0.28366	2.42999	0.0150994
Cd180	41.2764	-1.1528	0.478104	-2.41119	0.0159004
Fcgr2b	451.578	-1.06388	0.44322	-2.40033	0.0163802
Mapk8	435.977	0.621251	0.258913	2.39946	0.0164192
Saa1	70.3261	-1.29471	0.540576	-2.39505	0.0166179
Fyn	731.274	0.63718	0.266607	2.38996	0.0168503
Fpr2	77.835	-1.49142	0.624139	-2.38957	0.0168681
Abcb1a	236.643	0.847991	0.35555	2.38501	0.0170785
Oas3	35.7671	1.09315	0.458363	2.3849	0.0170837
Clec4n	98.057	-1.50877	0.633492	-2.38167	0.0172345
Hspb2	1091.46	0.878183	0.369535	2.37645	0.0174799
Cd244	40.0453	-1.03299	0.436912	-2.36429	0.0180648
C7	56.53	1.74834	0.741399	2.35817	0.0183655
Ccl5	25.6517	-1.38642	0.588009	-2.35781	0.0183829
Jam3	258.673	0.803854	0.342179	2.34922	0.0188128
Ccl7	55.406	-1.39195	0.604706	-2.30186	0.0213433
Bcl2l1	676.819	0.623696	0.271666	2.29582	0.0216862
Ep300	1109.28	0.443926	0.194051	2.28768	0.0221561
H2-DMb1	80.1399	-0.921355	0.40455	-2.27748	0.0227576
Clec7a	70.2835	-1.43077	0.635186	-2.25253	0.0242889
Muc1	59.3123	0.92096	0.409737	2.24768	0.0245963
Il24	113.032	-2.38198	1.06142	-2.24415	0.0248225
Lyz2	7048.06	-1.14439	0.510005	-2.24388	0.0248403
Tek	447.671	0.797409	0.357081	2.23313	0.0255405
Cd59b	27.9173	0.798767	0.359941	2.21916	0.0264756
Trem1	52.1357	-1.30232	0.588161	-2.21422	0.0268134
Gata3	40.776	-1.44871	0.656103	-2.20805	0.0272411
Havcr2	23.4785	1.21536	0.550866	2.20628	0.0273647
Lrrn3	21.4293	0.887369	0.403484	2.19927	0.027859
Ifit2	113.061	0.765747	0.348335	2.1983	0.0279274
Spp1	548.802	-2.08147	0.949545	-2.19207	0.0283742
Mcam	452.599	0.484072	0.221044	2.18994	0.0285286
Oas2	115.99	1.072	0.492455	2.17684	0.0294924
Il17f	28.5633	1.01233	0.466462	2.17024	0.0299887
Lamp3	6.64457	0.969041	0.449153	2.15748	0.0309681
Ncf4	129.409	-0.874053	0.405132	-2.15745	0.0309705
Mefv	30.3553	-1.02821	0.476937	-2.15586	0.0310945
Hck	66.7054	-1.05204	0.490478	-2.14493	0.0319588
Ccl11	819.504	0.731141	0.340906	2.1447	0.0319771
Fcer1a	58.344	-0.910387	0.425159	-2.14128	0.0322511
Ifit3	143.315	1.28087	0.598852	2.13887	0.0324462
C1qb	481.859	-0.874486	0.410825	-2.12861	0.0332863
Cxcr1	5.63593	-0.956725	0.451494	-2.11902	0.0340887
Isg15	80.3791	1.29781	0.616348	2.10565	0.0352349
Ccl1	11.8627	-0.763096	0.363073	-2.10177	0.0355737
Slc11a1	63.0575	-0.971942	0.464083	-2.09433	0.0362307
Bst1	102.058	-0.869318	0.415454	-2.09246	0.0363978
Fcer1g	314.32	-0.871998	0.417643	-2.0879	0.0368064
Msr1	78.6966	-1.13729	0.545588	-2.08453	0.0371123
Ccl12	55.2239	-1.26644	0.608121	-2.08255	0.0372921
Usp18	57.3705	0.978823	0.470583	2.08002	0.0375235
Lcp1	567.705	-0.946131	0.456115	-2.07433	0.038049
Tollip	1300.69	0.4602	0.22257	2.06766	0.0386717
Ifit1	74.9754	0.919894	0.445243	2.06605	0.0388237
Tnfsf11	33.9229	-1.49637	0.727079	-2.05806	0.0395843
Nfatc2	254.393	0.697143	0.340867	2.04521	0.0408345
Itgal	82.8709	-0.700367	0.343094	-2.04133	0.0412185
Irak1	531.054	0.371982	0.182605	2.03708	0.0416417
S100b	39.2029	0.982961	0.483787	2.0318	0.0421734
Selplg	224.788	-0.886984	0.441069	-2.01099	0.044327
Il22ra1	241.806	0.745582	0.370807	2.0107	0.044357
Cxcr2	73.2978	-0.876382	0.437627	-2.00258	0.0452228
Clec4a2	38.6234	-1.04184	0.52097	-1.9998	0.0455218
Cxcl9	145.856	-2.00333	1.00323	-1.99687	0.0458393
Il15	83.0329	0.754113	0.37988	1.98513	0.0471296
Il34	632.205	0.589427	0.298634	1.97374	0.0484109
Fcgr3	130.228	-1.00736	0.51092	-1.97165	0.0486491
Ikzf2	242.178	0.623617	0.316812	1.96842	0.0490203
Cd200r1	25.3202	-0.959279	0.487707	-1.96692	0.0491926
Itch	1712.03	0.315966	0.161801	1.95281	0.0508424
Klra7	4.19736	1.71808	0.880347	1.9516	0.0509858
Ptprc	203.282	-0.938177	0.481606	-1.94802	0.0514127
Isg20	307.25	-0.611485	0.313935	-1.94781	0.0514381
Il21r	21.3184	-0.847599	0.43728	-1.93834	0.0525813
Tnfsf13b	19.235	-0.731906	0.377998	-1.93627	0.0528346
Ccl4	22.2625	-0.934049	0.486019	-1.92184	0.0546264
Kdr	388.325	0.754097	0.395414	1.90711	0.0565065
Crebbp	1726.59	0.479294	0.251527	1.90554	0.0567104
Cfb	88.689	-0.906226	0.4762	-1.90304	0.0570358
Cmpk2	84.9102	0.802677	0.422162	1.90135	0.0572567
Nlrc5	399.415	-0.669291	0.353995	-1.89068	0.0586669
Zfp13	59.9387	0.595636	0.316642	1.8811	0.059958
Jun	1055.14	0.357342	0.190142	1.87934	0.0601979
Axl	1361.86	0.469078	0.250046	1.87597	0.0606593
Bcl2	167.349	0.463941	0.247592	1.87382	0.0609558
Ptgdr2	14.1381	1.08449	0.579913	1.87009	0.0614709
Ripk2	180.559	0.375114	0.201006	1.86618	0.0620164
Abl1	616.65	0.404088	0.216568	1.86587	0.0620595
Tmed1	377.965	0.466597	0.250876	1.85987	0.0629038
Mapkapk2	1651.08	0.414977	0.223138	1.85974	0.062923
Prf1	6.67698	-0.794004	0.427695	-1.85647	0.0633859
Tab1	581.61	0.402901	0.217293	1.85418	0.0637131
C5ar1	205.195	-0.920176	0.496779	-1.85228	0.063985
Ccl6	351.488	-0.914134	0.494301	-1.84935	0.0644074
Cd48	71.1282	-0.833761	0.450941	-1.84894	0.064467
Il16	183.872	0.588812	0.318926	1.84623	0.0648583
Itga2	155.319	-0.783294	0.427265	-1.83327	0.0667618
Pik3cg	46.108	-0.568544	0.310152	-1.83311	0.0667861
Cd47	785.09	0.362476	0.198151	1.82929	0.0673558
Il12rb2	31.5118	-1.12023	0.615342	-1.8205	0.0686826
Smad4	963.995	0.449829	0.247463	1.81776	0.0691011
Ifitm1	355.177	-0.58372	0.323195	-1.80609	0.0709038
Ifih1	236.785	0.535654	0.2968	1.80477	0.0711115
Xcr1	11.9889	0.65596	0.365459	1.79489	0.0726706
Itga6	3971.74	-0.723514	0.404111	-1.79038	0.0733924
Oaz1	6889.96	0.413869	0.231441	1.78823	0.0737387
Ncam1	194.367	0.66781	0.374267	1.78432	0.0743725
Tal1	64.1226	0.520692	0.293839	1.77203	0.0763891
Il19	109.571	-1.29621	0.735384	-1.76263	0.0779627
Pparg	51.1728	0.622882	0.353692	1.76109	0.0782236
Ccl9	808.646	-0.948552	0.541755	-1.75089	0.0799653
Il2rg	71.8715	-0.764668	0.439367	-1.74039	0.0817912
Il1b	767.417	-1.56054	0.902113	-1.72987	0.0836543
Tnf	52.5389	-0.767505	0.444415	-1.727	0.0841673
Tlr1	33.1301	-0.826224	0.481218	-1.71695	0.0859891
Mr1	286.095	0.50575	0.294607	1.71669	0.0860354
Cxcl16	289.828	-0.684744	0.400578	-1.70939	0.0873788
St6gal1	138.031	0.459449	0.269236	1.70649	0.0879165
Gusb	284.3	-0.376476	0.221018	-1.70338	0.0884977
Psmb8	856.64	-0.587032	0.345304	-1.70004	0.0891225
Trp53	701.452	0.546051	0.321224	1.6999	0.089149
Gpi1	8621.93	0.408572	0.24067	1.69765	0.0895745
Btla	13.0867	0.62014	0.365334	1.69746	0.0896097
Lamp1	8970.08	0.329949	0.195401	1.68857	0.0913012
Pax5	8.64996	-0.657324	0.390888	-1.68162	0.0926425
Mme	295.936	0.623634	0.372535	1.67403	0.0941251
Jak2	951.921	0.437514	0.261429	1.67355	0.0942196
Nod1	551.495	0.397334	0.23775	1.67123	0.0946765
Pla2g6	235.446	0.396555	0.237376	1.67058	0.0948046
Mx2	33.0398	0.683907	0.409872	1.66859	0.0951991
Fas	230.254	0.701578	0.420626	1.66794	0.0953279
Batf	43.5681	-0.52848	0.319139	-1.65596	0.0977306
C1qbp	2121.8	0.334719	0.202187	1.6555	0.0978238
Cd276	252.658	-0.596677	0.361792	-1.64923	0.0991015
Ly9	20.9978	-0.585863	0.355989	-1.64573	0.0998193
Il2ra	43.9727	-0.620398	0.378458	-1.63928	0.101155
Irf7	125.439	0.817522	0.49894	1.63852	0.101313
C8b	9.00847	-0.614956	0.375734	-1.63668	0.101698
Cd68	639.016	-0.567012	0.346493	-1.63643	0.10175
Sf3a3	696.335	0.407441	0.250157	1.62874	0.103368
Cd4	28.5763	-0.671711	0.412593	-1.62802	0.10352
Tgfb1	962.944	-0.443688	0.272562	-1.62784	0.103558
Tmem173	65.1772	-0.692136	0.425829	-1.62539	0.10408
Ddx60	68.4262	0.753479	0.46365	1.6251	0.104141
Mill2	117.558	0.645795	0.398085	1.62226	0.104749
Il18rap	33.1572	-0.723974	0.447475	-1.61791	0.105682
Mmp9	178.849	-1.38563	0.860741	-1.60982	0.107438
Tnfrsf4	44.1875	0.537036	0.333717	1.60926	0.10756
Cd36	5810.34	0.715783	0.446631	1.60263	0.109017
Cd14	359.587	-0.832128	0.519323	-1.60233	0.109082
Pdgfc	184.524	-0.623557	0.390137	-1.5983	0.109976
Pvr	207.092	0.403622	0.25259	1.59793	0.110058
Ltk	11.8979	0.644236	0.404845	1.59132	0.111539
Psmb7	1535.19	0.406583	0.256801	1.58326	0.113362
Epsti1	6.47024	-0.703895	0.447765	-1.57202	0.115946
Bst2	360.943	0.657149	0.422414	1.5557	0.119779
Traf6	865.954	0.628723	0.405026	1.5523	0.12059
Il15ra	224.627	0.411863	0.265328	1.55228	0.120596
Ifna1	16.1813	0.698169	0.451002	1.54804	0.121613
Sdha	3899.63	0.54334	0.352027	1.54346	0.122719
Ifi44	96.7864	0.948162	0.616373	1.53829	0.123977
Tnfrsf10b	136.289	0.557694	0.363048	1.53615	0.124503
Eng	1077.48	0.407865	0.26657	1.53005	0.126005
Klrd1	27.4557	-0.475163	0.311084	-1.52744	0.126651
Itga2b	103.245	0.46804	0.307562	1.52177	0.128066
Erbb2	2051.14	0.417784	0.274826	1.52018	0.128466
Fcer2a	6.29695	-0.654961	0.4321	-1.51576	0.12958
Tnfsf13	89.1105	0.560092	0.371052	1.50947	0.131178
Eif2b4	621.816	0.311832	0.206604	1.50932	0.131217
Ccl8	356.845	-1.31164	0.874391	-1.50006	0.133599
Ythdf2	838.633	0.401346	0.267911	1.49805	0.134119
Ifnl2	10.5481	-0.745376	0.500166	-1.49026	0.136157
Tgfb3	372.598	0.358873	0.241584	1.4855	0.137411
Cxcl13	784.306	1.28462	0.866437	1.48265	0.138169
Marco	12.0337	-0.747119	0.504529	-1.48083	0.138653
Hamp	10.2008	0.804031	0.543459	1.47947	0.139015
Ikzf1	29.4366	-0.570385	0.387995	-1.47008	0.141539
Ikbkg	349.331	0.316986	0.216267	1.46572	0.142726
Ccl2	262.345	-0.906224	0.620278	-1.461	0.144016
Irak4	315.873	-0.361294	0.248167	-1.45585	0.145433
Cdkn1a	3846.75	0.471612	0.324101	1.45514	0.145632
Cebpb	3348.16	0.297584	0.204651	1.4541	0.145917
Cd33	85.8814	-0.616733	0.424883	-1.45154	0.14663
Hdac3	682.131	0.285735	0.197056	1.45002	0.147053
Pou2f2	35.245	-0.602372	0.418338	-1.43992	0.14989
Mnx1	6.8502	-0.60499	0.420495	-1.43876	0.15022
Il7r	123.062	-0.586461	0.409472	-1.43224	0.152076
Lif	107.295	-0.830665	0.582504	-1.42602	0.153861
Tubb5	2777.9	-0.545779	0.383129	-1.42453	0.154293
Slc7a11	665.023	1.06318	0.747273	1.42274	0.154811
Jak3	227.33	0.351183	0.247834	1.41701	0.156481
Cxcl1	401.587	-1.17091	0.836524	-1.39974	0.161592
Ccr6	27.4048	0.630305	0.450752	1.39834	0.162011
Alcam	247.103	0.487584	0.350523	1.39102	0.16422
Irf8	83.3803	-0.401325	0.289204	-1.38769	0.165231
Irf1	519.5	-0.500019	0.361544	-1.38301	0.166662
Nup107	482.367	0.359288	0.261624	1.3733	0.169659
Thy1	492.748	-0.554604	0.40395	-1.37295	0.169768
Il23a	23.4849	-0.478806	0.349872	-1.36852	0.17115
Chil3	103.183	-0.945443	0.692828	-1.36461	0.172375
Akt3	335.163	0.305628	0.224351	1.36228	0.173111
Il21	9.99072	-0.53625	0.394389	-1.3597	0.173925
Btk	54.4264	-0.521997	0.385311	-1.35474	0.175499
Reps1	655.186	0.415423	0.306945	1.35341	0.175925
Casp8	431.377	-0.250758	0.185897	-1.34891	0.177367
Rel	309.33	0.328162	0.243803	1.34601	0.178299
Stat5b	427.892	0.318755	0.237053	1.34466	0.178735
Lck	34.4001	-0.497137	0.370418	-1.3421	0.179565
Icam4	22.7596	0.498884	0.371728	1.34207	0.179574
Il25	10.3627	0.476207	0.355131	1.34093	0.179943
Il27	7.92021	-0.53672	0.401329	-1.33736	0.181106
Ncr1	6.19041	0.569433	0.425918	1.33695	0.181238
Vcam1	68.5952	-0.650573	0.487477	-1.33457	0.182017
Osm	58.1218	-0.831212	0.62676	-1.3262	0.184772
Ifnb1	6.48237	0.56848	0.429597	1.32329	0.18574
Anp32b	3492.36	0.279411	0.21244	1.31525	0.188427
Sh2b2	63.4247	-0.494105	0.376468	-1.31248	0.189359
Sele	102.735	-0.680265	0.520646	-1.30658	0.191356
Abcf1	573.339	0.322098	0.246841	1.30488	0.191934
Runx3	27.969	-0.49513	0.37962	-1.30428	0.192139
Mertk	141.201	0.487536	0.374183	1.30293	0.192597
Lbp	185.548	-0.420204	0.324431	-1.2952	0.19525
Ciita	59.4013	-0.745067	0.578495	-1.28794	0.197767
Lyn	306.272	-0.256542	0.19933	-1.28703	0.198085
Pdgfrb	338.795	0.378089	0.293796	1.28691	0.198126
Fez1	63.3905	0.581648	0.452234	1.28617	0.198385
Nlrp3	67.727	-0.8026	0.624744	-1.28469	0.198902
Cd37	128.777	-0.487482	0.379839	-1.28339	0.199356
Ccrl2	122.4	0.503194	0.392508	1.282	0.199844
Ccl20	36.8329	0.655543	0.511462	1.2817	0.199947
Tnfrsf1b	345.222	-0.531783	0.414904	-1.2817	0.199948
Cd8b1	7.71345	0.593483	0.463727	1.27981	0.200611
Tlr8	77.8895	-0.542227	0.424451	-1.27748	0.201433
Egr1	1130.29	0.385558	0.302622	1.27406	0.202643
Vegfa	2920.91	0.374818	0.294421	1.27307	0.202995
Il6ra	872.994	0.393616	0.30942	1.27211	0.203333
Hif1a	10213	-0.503877	0.398497	-1.26444	0.206071
Ly86	84.4358	-0.555691	0.439536	-1.26427	0.206134
Igf1r	1544.32	0.394062	0.312313	1.26175	0.207038
Smad2	326.938	0.273266	0.217007	1.25925	0.207939
Icam2	134.742	0.540132	0.429272	1.25825	0.208301
Il17b	29.682	-0.536692	0.427566	-1.25523	0.209397
Ticam1	139.703	0.305522	0.243522	1.2546	0.209626
Nfkbia	1446.02	0.36795	0.293526	1.25355	0.210005
Ctsh	751.613	-0.379163	0.303327	-1.25002	0.211294
Gzmb	14.2687	-0.495606	0.397839	-1.24574	0.212858
Rora	1189.47	0.276726	0.224483	1.23273	0.217676
Vhl	232.243	0.321786	0.261821	1.22903	0.21906
Dusp6	1768.08	-0.532869	0.433598	-1.22895	0.219092
Atf2	483.405	0.334933	0.27347	1.22475	0.220669
Ifngr1	769.499	0.347503	0.283874	1.22415	0.220897
Cd55	202.597	0.485126	0.396639	1.22309	0.221295
Il11ra1	189.057	0.401084	0.328612	1.22054	0.222259
Notch1	1509.81	0.309992	0.255904	1.21136	0.225758
Mapk14	2436.99	0.276578	0.228692	1.20939	0.226512
Ccr3	9.63822	-0.857221	0.711068	-1.20554	0.227995
Cxcl2	169.802	-1.0591	0.880538	-1.20279	0.229057
Mef2c	3175.5	0.54417	0.452995	1.20127	0.229646
Csf3	55.6002	-0.839121	0.701397	-1.19636	0.231558
Atg16l1	495.672	0.330294	0.277419	1.1906	0.233812
Ewsr1	2946.34	0.369055	0.31399	1.17537	0.239846
Pvrl2	249.817	0.333786	0.285029	1.17106	0.241576
Igll1	8.53212	0.471206	0.4024	1.17099	0.241603
Ccl17	29.8014	0.466664	0.399022	1.16952	0.242193
Ikbke	314.889	-0.316494	0.271701	-1.16486	0.244076
Emr1	197.903	-0.624397	0.536859	-1.16306	0.244807
Lcn2	818.566	-0.607451	0.524729	-1.15765	0.247008
Pnma1	42.4589	0.400756	0.346416	1.15686	0.247329
Cd2	19.6227	-0.418818	0.362068	-1.15674	0.247379
Sap130	424.212	0.284753	0.247783	1.1492	0.250472
Pml	416.907	-0.307512	0.267657	-1.1489	0.250597
Nfatc4	318.29	0.319963	0.278667	1.14819	0.25089
Glycam1	8.18553	-0.45482	0.396146	-1.14811	0.250923
Cd200	325.768	0.402045	0.350518	1.147	0.251381
Cxcl3	237.768	-1.21498	1.06206	-1.14398	0.25263
Sh2d1a	11.4949	-0.418738	0.366305	-1.14314	0.252979
Tnfrsf13b	19.1189	-0.504629	0.442938	-1.13928	0.254588
Il17a	22.5767	0.718502	0.632411	1.13613	0.255902
H2-Ab1	2246.34	-0.519942	0.458677	-1.13357	0.256976
Fap	146.249	0.502314	0.443614	1.13232	0.257499
Nfatc3	383.849	0.2343	0.207078	1.13146	0.257863
Aicda	8.67495	0.480704	0.425304	1.13026	0.258367
Slamf6	9.34986	-0.430501	0.382387	-1.12583	0.260239
Cd40lg	18.0724	-0.423407	0.376308	-1.12516	0.260521
Cd34	1532.65	0.381283	0.339563	1.12286	0.261495
Rag1	11.5371	-0.415699	0.370855	-1.12092	0.262322
Ubc	18246.1	0.37867	0.340055	1.11356	0.26547
Tnfsf8	11.5469	-0.417312	0.37508	-1.11259	0.265883
Irf5	327.662	-0.239526	0.215519	-1.11139	0.266401
Smn1	643.833	0.34259	0.308254	1.11139	0.266402
Cxcl11	51.5306	0.510073	0.459323	1.11049	0.266789
Cfi	10.3968	0.406957	0.367066	1.10867	0.267571
H2-Q10	50.2204	-0.525065	0.474084	-1.10754	0.268062
Pdcd1	31.5932	-0.542596	0.489972	-1.1074	0.26812
Hcst	35.1162	-0.441449	0.400022	-1.10356	0.269783
Psma2	2716.1	0.31703	0.290861	1.08997	0.275726
Itk	11.0262	-0.40398	0.371894	-1.08628	0.277356
Il4	8.45249	-0.442828	0.408458	-1.08414	0.278301
Yy1	1229.82	0.310258	0.287809	1.078	0.281034
Atg10	194.372	0.333524	0.310034	1.07577	0.282031
Ambp	9.7233	0.513027	0.477236	1.075	0.282377
Ticam2	23.6972	-0.426062	0.397318	-1.07234	0.283565
Tlr2	113.875	-0.423742	0.3957	-1.07087	0.284228
Tgfbr1	864.845	0.232145	0.217014	1.06972	0.284745
Herc6	58.2296	0.280589	0.263702	1.06404	0.287313
Tnfrsf17	13.0799	0.495161	0.465772	1.0631	0.287737
Cklf	23.7241	-0.323849	0.306475	-1.05669	0.290653
Spn	49.8345	-0.375733	0.357347	-1.05145	0.293052
Mfge8	393.445	0.209578	0.201206	1.04161	0.297592
Map4k2	215.102	0.273709	0.263387	1.03919	0.298717
Map2k2	2126.97	0.19904	0.192035	1.03648	0.299979
Klra27	9.19185	-0.49605	0.479024	-1.03554	0.300415
Cxcr6	47.8903	-0.427512	0.415573	-1.02873	0.303606
Cmah	85.0253	-0.592065	0.58053	-1.01987	0.30779
Jak1	1531.47	0.155333	0.152489	1.01865	0.308371
Ddx58	168.576	0.308827	0.303336	1.0181	0.308629
Bcl6	366.24	0.310613	0.305748	1.01591	0.309671
Ly96	221.892	0.234918	0.233167	1.00751	0.31369
Ppbp	309.985	-0.824917	0.827431	-0.996962	0.318783
Raet1	35.8291	0.479807	0.482204	0.995029	0.319722
Ctsl	643.27	0.330126	0.33187	0.994745	0.31986
Elk1	70.1919	0.260078	0.262066	0.992414	0.320996
Txnip	4906.5	0.474046	0.47808	0.991562	0.321411
Nfkb2	643.667	-0.26258	0.266034	-0.987017	0.323634
Masp1	303.972	-0.311791	0.316728	-0.984414	0.324912
Foxp3	18.4698	-0.406425	0.413809	-0.982156	0.326023
C1qa	1043.71	-0.366598	0.373279	-0.982102	0.32605
Cyld	294.133	0.249764	0.254377	0.981864	0.326167
Tnfrsf12a	730.648	-0.366483	0.379489	-0.965728	0.33418
Tnfrsf18	38.7838	-0.444553	0.462303	-0.961605	0.336248
H2-K1	3945.69	-0.263546	0.27569	-0.955953	0.339096
Cd160	11.4256	0.353849	0.370414	0.95528	0.339436
Entpd1	254.997	0.216596	0.228784	0.946725	0.343779
Anxa1	10115.7	-0.406879	0.433576	-0.938426	0.348026
Atm	290.827	0.227167	0.242158	0.938096	0.348195
Il4ra	964.472	-0.393311	0.419358	-0.937888	0.348302
Cxcl15	4.95101	-0.431608	0.460222	-0.937824	0.348335
Elane	5.95519	0.449166	0.480442	0.934901	0.349839
Serping1	1782.43	0.274513	0.294066	0.933507	0.350558
Csf2	13.7748	-0.448747	0.483155	-0.928784	0.353001
Angpt1	37.0339	0.46947	0.505509	0.928709	0.35304
Ifi35	401.16	0.214755	0.233905	0.918129	0.358552
H2-Q1	7.65557	-0.353382	0.385076	-0.917693	0.35878
Ifng	10.5229	0.372431	0.409539	0.909389	0.363145
Tank	562.011	0.244459	0.269038	0.908642	0.363539
Gbp5	97.3182	-0.561513	0.619438	-0.906488	0.364678
Syt17	17.9331	0.30414	0.336166	0.904732	0.365608
Vwf	526.086	0.329787	0.365261	0.902881	0.366589
Fn1	2960.64	-0.420693	0.467128	-0.900594	0.367804
Ccl27a	95.0709	0.263567	0.293211	0.898901	0.368705
H2-Eb1	1348.76	-0.499324	0.555794	-0.898398	0.368974
Stat3	3008.38	0.193774	0.215757	0.898111	0.369126
Chuk	1037.88	0.163791	0.182895	0.895546	0.370495
Il1r1	338.353	-0.243673	0.272631	-0.893786	0.371436
Klra5	8.6633	0.34832	0.389926	0.893297	0.371698
Pin1	171.131	0.258759	0.290233	0.891557	0.372631
Tlr4	327.487	0.197119	0.221514	0.889869	0.373536
Ccr4	7.72024	0.371503	0.419359	0.885884	0.37568
Ikbkb	736.766	0.210168	0.237345	0.885497	0.375889
Cd28	24.1938	0.333211	0.376649	0.884672	0.376333
Ebi3	25.4268	-0.316101	0.357491	-0.884222	0.376577
Socs1	134.216	-0.288732	0.32678	-0.883568	0.37693
Traf3	309.822	-0.212803	0.241823	-0.879993	0.378863
Nod2	313.069	-0.322817	0.368516	-0.875992	0.381034
Ada	9547.86	0.3911	0.44732	0.874316	0.381946
Abca1	606.501	0.228559	0.261455	0.874179	0.382021
Crp	10.654	0.324676	0.376623	0.862071	0.388648
H2-Aa	1664.07	-0.425525	0.494544	-0.860439	0.389547
Ccl21a	1222.64	-0.468326	0.545175	-0.859037	0.39032
Il23r	26.5753	-0.265767	0.310284	-0.856526	0.391707
Cma1	284.867	0.450851	0.526736	0.855934	0.392034
C2	96.0851	0.364868	0.427845	0.852804	0.393768
Fadd	89.6121	-0.247407	0.291002	-0.850191	0.395219
Dpp4	92.9962	0.379065	0.448009	0.84611	0.397491
Vegfc	101.408	0.284927	0.337656	0.843836	0.398761
Polr1b	231.969	0.258017	0.306078	0.842981	0.399239
Map2k1	1083.49	0.154089	0.182906	0.842447	0.399538
Nos2	19.9746	-0.30254	0.359315	-0.841993	0.399792
Cr2	10.456	0.295028	0.353247	0.83519	0.403611
Il9	6.12297	0.340887	0.408859	0.833752	0.404421
Kit	61.6513	0.281032	0.338762	0.829586	0.406773
Ilf3	435.041	0.207263	0.250899	0.826081	0.408758
Rpl19	19679.6	0.247435	0.300219	0.82418	0.409837
Cd8a	9.034	-0.309969	0.378211	-0.819568	0.412462
Klrb1	10.445	0.345081	0.422062	0.817609	0.413581
Blnk	507.581	0.246282	0.302221	0.814909	0.415125
Syk	248.47	-0.220297	0.270413	-0.814669	0.415262
Ptgs2	560.235	-0.785463	0.966906	-0.812347	0.416593
C9	8.63261	0.411801	0.509943	0.807542	0.419354
Ccr8	12.6902	0.30346	0.378231	0.802314	0.422372
Psmd7	4542.14	0.183001	0.22853	0.800775	0.423262
Cd1d1	113.96	-0.298029	0.373224	-0.798526	0.424565
Sigirr	93.8058	0.228435	0.287529	0.794474	0.42692
Zap70	22.8108	-0.274466	0.346951	-0.791079	0.428898
Polr2a	948.304	0.227367	0.288711	0.787524	0.430975
Relb	304.433	-0.213886	0.272579	-0.784675	0.432644
Slamf1	18.2532	0.31709	0.404655	0.783607	0.433271
Tbk1	331.085	0.169873	0.218303	0.778153	0.436479
Thbs1	984.762	-0.417463	0.536754	-0.777755	0.436713
Prkcd	1852.74	0.185956	0.239145	0.777589	0.436811
Creb5	233.931	0.224551	0.289533	0.775563	0.438007
Ctla4	59.7209	-0.255524	0.330258	-0.773712	0.439101
Nrp1	733.961	0.270514	0.352424	0.767581	0.442736
Il2rb	96.6592	-0.32761	0.428106	-0.765256	0.444119
Itga4	68.477	-0.338255	0.443312	-0.763019	0.445452
Map2k4	809.628	0.146676	0.192581	0.76163	0.446281
Cd40	34.5831	-0.304326	0.400772	-0.759349	0.447644
Hprt	3018.69	0.231989	0.305973	0.758201	0.448331
Atg12	515.58	0.160101	0.211643	0.756469	0.449368
G6pdx	3764.67	0.27871	0.368786	0.75575	0.449799
Ccr9	47.3711	0.389116	0.515901	0.754247	0.450701
Mavs	677.577	0.185103	0.246111	0.75211	0.451985
Cd53	32.219	-0.222665	0.296453	-0.751097	0.452594
Clu	1122.79	0.218845	0.291499	0.750758	0.452798
Hc	6.29237	0.289729	0.391119	0.740771	0.458832
Ccr2	214.777	-0.676434	0.91677	-0.737844	0.460609
Map3k7	1038.07	0.151659	0.205871	0.736671	0.461323
Epcam	630.885	-0.276113	0.376338	-0.733684	0.463142
Cd38	201.418	-0.279452	0.382411	-0.730762	0.464925
Lgals3	6385.34	0.273136	0.3741	0.730114	0.465321
Tfe3	442.256	0.181267	0.248317	0.729982	0.465401
Cd96	10.0896	0.27581	0.380152	0.725524	0.46813
Cd86	65.3465	0.208664	0.288159	0.724129	0.468987
Il10ra	80.4678	-0.301866	0.417717	-0.722658	0.46989
Tlr3	56.9051	-0.205354	0.285873	-0.71834	0.472547
Hsd11b1	188.728	0.268698	0.375037	0.716456	0.47371
Bmi1	206.49	0.19115	0.268091	0.713005	0.475842
Myc	953.457	0.275936	0.388193	0.710821	0.477195
F12	5.17357	0.308632	0.434252	0.710721	0.477257
Mx1	8.70269	0.260529	0.366727	0.710417	0.477446
Ifna4	12.5801	-0.311609	0.438716	-0.710274	0.477534
Il3	6.14384	0.296715	0.42056	0.705524	0.480484
Atf1	312.954	0.169421	0.240546	0.704321	0.481233
Mif	9528.52	-0.190645	0.27214	-0.700539	0.483591
Itgb4	2861.46	-0.24887	0.357162	-0.696797	0.48593
Alas1	2095.74	0.17496	0.251231	0.696413	0.48617
Ets1	634.01	0.200411	0.288924	0.693648	0.487903
Arg1	2855.06	-0.305184	0.440661	-0.692558	0.488587
Fasl	7.0903	-0.293048	0.423589	-0.69182	0.489051
Ifi27	1695.31	0.171626	0.250968	0.683855	0.494067
Il13ra1	1038.09	-0.189027	0.277045	-0.682299	0.49505
Mrc1	485.519	-0.329065	0.483807	-0.680158	0.496404
Irgm2	83.433	-0.272449	0.401162	-0.67915	0.497043
Tnfrsf11b	12.5157	-0.27082	0.399321	-0.678201	0.497644
Gbp2b	8.55677	0.341525	0.503893	0.677774	0.497915
Il3ra	125.966	-0.225892	0.333313	-0.677717	0.497951
Arg2	71.1352	0.321184	0.475054	0.6761	0.498977
C1ra	627.907	-0.18862	0.279298	-0.675336	0.499462
Eomes	14.9003	-0.34358	0.509385	-0.6745	0.499993
Zbp1	78.0649	-0.355871	0.527999	-0.673998	0.500312
Ltb	26.1924	-0.334771	0.501913	-0.66699	0.504779
H2-Ea-ps	12.6586	0.600321	0.900289	0.666809	0.504894
Il22ra2	23.9866	-0.321966	0.486668	-0.661573	0.508245
H60a	12.4396	0.293576	0.444464	0.660518	0.508921
Tnfsf18	13.5226	0.250534	0.381857	0.656093	0.511764
C1s1	1324.92	-0.212399	0.324457	-0.654628	0.512707
Hras	59.7535	0.225069	0.346299	0.649929	0.515738
Aire	13.3973	-0.235276	0.362622	-0.64882	0.516455
Klra1	8.28975	-0.256838	0.396078	-0.648454	0.516691
F13a1	353.563	0.259727	0.403018	0.644455	0.519281
Birc5	144.945	-0.214173	0.332415	-0.644295	0.519384
Thbd	1605.9	0.155384	0.241338	0.643841	0.519678
Hmgb1	1082.47	0.134118	0.20934	0.64067	0.521737
Gpr44	24.0292	0.249803	0.390048	0.640441	0.521886
Cdh1	3747.7	0.205793	0.32728	0.628796	0.529483
Il22	16.2036	0.246507	0.393864	0.625869	0.531401
H2-Dma	119.107	-0.257025	0.413184	-0.622058	0.533903
Cd63	5132.54	0.117948	0.191565	0.615709	0.538086
Tnfsf10	65.7685	0.321191	0.523733	0.613272	0.539696
Cspg4	370.112	0.17085	0.280337	0.609445	0.542229
Cd9	7296.87	0.182507	0.299813	0.608736	0.542699
Ccl24	57.0392	0.45169	0.742452	0.608376	0.542938
Cd70	12.1171	0.238637	0.393859	0.605893	0.544586
Cd79a	6.43904	-0.25687	0.424185	-0.60556	0.544807
C4b	1223.77	0.236446	0.392971	0.601688	0.547382
Gzma	31.5488	-0.314712	0.523605	-0.601048	0.547808
Csf2rb	209.011	-0.260303	0.434423	-0.599192	0.549045
Ccnd3	308.314	0.129281	0.215853	0.59893	0.54922
Chit1	4370.23	0.221551	0.370433	0.598089	0.549781
Tnfsf14	24.2601	-0.227999	0.385089	-0.592068	0.553805
Tigit	23.3996	-0.198154	0.335463	-0.590689	0.554729
Stat6	1922.9	-0.116993	0.198655	-0.588925	0.555912
Il1a	242.533	-0.240764	0.409677	-0.587693	0.556738
Il1rapl2	13.5876	0.196719	0.338283	0.581523	0.560888
C8a	4.28908	0.261504	0.451599	0.579062	0.562547
Gpr183	37.258	-0.251358	0.434446	-0.578572	0.562878
Tap2	326.033	0.128153	0.223823	0.572566	0.566938
Plau	1345.21	-0.222328	0.388586	-0.572146	0.567223
Tlr7	33.175	-0.24509	0.428434	-0.572059	0.567282
Eef1g	7976.4	-0.102851	0.180722	-0.56911	0.569282
Icos	52.0698	-0.188336	0.332376	-0.566635	0.570962
Xaf1	270.041	0.241626	0.426569	0.56644	0.571095
Socs3	425.054	-0.210618	0.375485	-0.560923	0.57485
Il13	8.57593	-0.244738	0.437033	-0.56	0.57548
Col4a1	1339.68	-0.18915	0.337776	-0.559986	0.575489
Il5	20.77	0.204416	0.369657	0.552989	0.580271
Mapk1	1295.36	0.110301	0.20007	0.55131	0.581421
Egfr	826.578	0.138732	0.25266	0.549085	0.582947
Ctsg	7.49105	-0.219105	0.399169	-0.548903	0.583072
Cd163	278.707	0.238797	0.437805	0.545443	0.585449
Tlr9	26.2677	-0.176174	0.323091	-0.545277	0.585563
Tnfrsf11a	77.3355	-0.145003	0.266798	-0.543495	0.586789
Tnfsf4	12.5323	-0.280952	0.517483	-0.542921	0.587184
Csf1r	387.588	-0.203639	0.376801	-0.540442	0.588892
Sbno2	1039.67	-0.145309	0.27013	-0.537921	0.590632
Cd74	4015.72	-0.271749	0.508176	-0.534754	0.59282
Tapbp	1288.52	0.106191	0.199673	0.531823	0.594848
Klra17	21.1255	0.243526	0.458867	0.530712	0.595619
Cfh	1271.36	0.223897	0.422233	0.530269	0.595926
Prdm1	726.522	0.189184	0.356903	0.530071	0.596063
Ppia	17740.8	-0.135325	0.257343	-0.525852	0.598991
Cfp	148.447	-0.218977	0.417362	-0.524669	0.599813
Cd3eap	175.689	-0.152334	0.291181	-0.523158	0.600864
Il1rap	452.783	0.130063	0.248768	0.522827	0.601094
Rela	697.528	0.116079	0.223227	0.520007	0.603059
Xcl1	8.34647	-0.201089	0.394869	-0.509255	0.610573
Il5ra	8.23593	0.209238	0.411517	0.508455	0.611135
Tpsab1	112.567	0.332752	0.658454	0.505353	0.613311
C6	47.4921	-0.274378	0.5443	-0.504094	0.614195
Il1r2	226.633	-0.19434	0.386082	-0.503363	0.614709
Tdo2	10.2898	0.182575	0.363527	0.502233	0.615504
Klra21	12.4758	-0.17396	0.348681	-0.498908	0.617844
Csf1	257.836	-0.169207	0.340877	-0.496386	0.619622
Pla2g1b	8.06936	0.196117	0.397767	0.493045	0.621981
Klra3	4.77918	-0.225448	0.457389	-0.492903	0.622081
Flt3	21.8345	-0.16289	0.330473	-0.492899	0.622084
Tnfrsf13c	13.0233	0.186693	0.381326	0.489591	0.624424
Cd97	531.871	0.146399	0.299332	0.489085	0.624781
Plaur	500.227	-0.288405	0.591306	-0.487743	0.625732
Klrk1	21.9827	-0.216514	0.444493	-0.487104	0.626185
Dusp4	187.293	0.256895	0.537006	0.478383	0.632377
Sh2d1b1	15.7411	0.180379	0.38054	0.474008	0.635494
Lamp2	4409.48	0.104896	0.226309	0.463509	0.642999
Cd247	30.2325	-0.181208	0.390962	-0.463493	0.643011
Fut7	11.6262	0.161612	0.350649	0.460893	0.644875
Stat1	478.483	-0.168956	0.367687	-0.45951	0.645868
C8g	15.7185	-0.176482	0.40396	-0.436879	0.662199
Mapk3	2155.21	0.109886	0.251991	0.436071	0.662785
Bcl10	1319.3	0.131416	0.302609	0.434277	0.664087
Blk	25.4128	-0.204585	0.471096	-0.434275	0.664089
App	4901.93	0.0959224	0.222565	0.430985	0.666479
Ms4a2	24.2504	-0.130167	0.303525	-0.428849	0.668033
Mbl2	6.67703	0.185341	0.434631	0.426432	0.669793
Tnfsf12	204.841	0.149351	0.353541	0.422443	0.672701
Cd164	3292.32	0.114418	0.273212	0.418789	0.675371
Lyve1	264.948	0.149598	0.359331	0.416324	0.677173
Psmb9	205.012	-0.150208	0.365545	-0.410916	0.681134
Ifna2	5.8829	0.18702	0.460453	0.406166	0.68462
Ido1	8.99509	-0.165095	0.406566	-0.406073	0.684689
Cd99	2432.27	0.119376	0.298355	0.400115	0.689072
Il13ra2	11.3704	-0.1667	0.417027	-0.399734	0.689352
Litaf	559.353	0.0983334	0.247597	0.397152	0.691256
Tap1	614.172	-0.129319	0.330633	-0.391127	0.695703
Tnfaip3	214.018	0.129056	0.330119	0.390936	0.695844
C3	2153.98	0.140136	0.361492	0.38766	0.698268
Cd3e	39.3078	-0.148264	0.385812	-0.384291	0.700762
H2-Q2	14.6311	-0.195695	0.509877	-0.383809	0.70112
Vim	5910.94	0.120242	0.314137	0.382771	0.70189
Cd3d	37.954	-0.156754	0.412062	-0.380414	0.703638
Myd88	432.049	-0.089664	0.23722	-0.377977	0.705447
Casp3	141.711	-0.0887137	0.236715	-0.374771	0.707831
Cd6	14.9615	-0.142856	0.385038	-0.371017	0.710625
Atg7	170.737	0.0956549	0.25788	0.370928	0.710691
A2m	23.3252	-0.193261	0.533454	-0.362283	0.717141
H2-M3	101.273	-0.114811	0.318152	-0.360867	0.718199
Il18	667.936	-0.135902	0.378319	-0.359226	0.719426
Tgfbr2	2182.85	0.0729788	0.203327	0.358924	0.719652
Irf4	41.7315	0.155041	0.432819	0.358213	0.720184
Igf2r	1124.45	0.0721236	0.204806	0.352155	0.724722
Ccl3	79.783	-0.260979	0.745493	-0.350075	0.726282
Camp	12.3059	-0.210723	0.604043	-0.348855	0.727198
H2-D1	9342.47	0.0908935	0.261127	0.348082	0.727779
Rsad2	46.5795	0.142462	0.410332	0.347187	0.728451
Il18r1	44.3499	-0.098203	0.285073	-0.344483	0.730483
Ccl26	7.39524	-0.143217	0.421851	-0.339495	0.734237
Ifnar2	192.801	0.072428	0.213618	0.339054	0.734569
Map3k1	752.525	-0.0785356	0.232273	-0.338117	0.735275
H2-DMb2	27.0363	0.151339	0.455159	0.332496	0.739515
Inpp5d	86.8944	0.0991299	0.299767	0.33069	0.740878
Stat2	272.905	0.084589	0.255801	0.330684	0.740884
Il17rb	36.4929	-0.110979	0.336345	-0.329956	0.741433
Klrc2	4.03704	-0.26184	0.796552	-0.328717	0.742369
Ltbr	787.392	0.0810277	0.247512	0.327369	0.743389
Irf3	780.433	-0.0948671	0.29514	-0.321431	0.747884
Ms4a1	14.0267	-0.115832	0.362235	-0.319771	0.749142
Mst1r	295.583	-0.0890752	0.287053	-0.31031	0.756325
Il12a	22.37	0.103966	0.336121	0.309312	0.757084
Itgb1	3974.96	0.0553784	0.180468	0.306859	0.75895
Tcf7	151.725	-0.110702	0.361659	-0.306096	0.759532
Bax	261.016	0.0653933	0.221021	0.295869	0.76733
Ccr7	31.8972	-0.0885171	0.300345	-0.294718	0.768209
Cd5	274.592	0.085899	0.292322	0.293851	0.768872
Tfrc	1925.71	-0.0858594	0.293611	-0.292426	0.769961
Tnfsf15	9.56194	0.106638	0.368335	0.289514	0.772188
Cd207	63.0268	0.152305	0.537801	0.2832	0.777024
Lag3	29.997	0.0855402	0.302734	0.282559	0.777515
Adora2a	22.5159	0.10105	0.365377	0.276563	0.782115
Timd4	36.455	0.154266	0.559965	0.275492	0.782938
Ccl25	56.443	0.0973318	0.353838	0.275074	0.783259
Itgae	59.5623	-0.0899906	0.334677	-0.268888	0.788016
Psen1	1488.1	0.0610364	0.228758	0.266816	0.789611
Smpd3	1812.55	-0.0939727	0.355556	-0.264298	0.79155
Snai1	63.2281	-0.0919457	0.350121	-0.262611	0.79285
Pmch	5.73828	0.114662	0.44345	0.258567	0.795969
Irf2	366.447	-0.0556319	0.215498	-0.258155	0.796287
Psmb10	127.487	-0.0704995	0.274342	-0.256977	0.797197
Xbp1	2225.68	-0.0601471	0.234159	-0.256864	0.797284
Cmklr1	319.046	-0.0726793	0.283306	-0.25654	0.797534
Spink5	801.946	0.100467	0.393566	0.255273	0.798512
Foxj1	6.03301	-0.102435	0.409897	-0.249905	0.802661
H2-T23	1704.13	-0.0727817	0.292858	-0.248522	0.80373
Cd46	6.97456	-0.122065	0.493457	-0.247366	0.804625
Pycard	104.872	-0.0761057	0.309107	-0.246211	0.805519
Itga5	224.368	-0.111497	0.455585	-0.244734	0.806662
H2-Ob	17.2013	-0.0986785	0.406046	-0.243023	0.807988
Ifitm2	6288.62	0.0534809	0.220272	0.242795	0.808165
Cd81	5141.35	0.0516074	0.214502	0.240591	0.809872
Klra20	10.8488	0.106064	0.456069	0.232562	0.816102
Il17ra	307.227	0.0607575	0.26179	0.232085	0.816472
Ifi44l	9.90214	0.0949761	0.430369	0.220685	0.825338
Tnfrsf1a	2738.68	0.0454053	0.207629	0.218685	0.826895
Itgb3	119.753	0.0743329	0.344212	0.215951	0.829026
Lilra5	14.2318	-0.0845325	0.394196	-0.214443	0.830202
Prg2	8.34999	-0.082598	0.386007	-0.213981	0.830562
Nubp1	388.538	-0.0513963	0.240266	-0.213915	0.830614
Il2	7.77513	-0.0799841	0.37461	-0.213513	0.830927
Cd83	67.611	0.106026	0.497433	0.213147	0.831212
Fos	1146.25	0.0727344	0.343114	0.211983	0.83212
Casp1	559.308	-0.0971819	0.46319	-0.20981	0.833816
Edc3	248.766	-0.0460925	0.224585	-0.205234	0.837389
Twist1	145.348	-0.0761924	0.376846	-0.202184	0.839773
Nfkb1	939.44	0.0392717	0.194525	0.201885	0.840007
Ceacam1	259.395	0.0781602	0.390123	0.200347	0.841209
Flt3l	190.188	0.0611927	0.308266	0.198506	0.842649
Klra4	23.8608	-0.0950765	0.478974	-0.1985	0.842653
Gfi1	13.409	0.0772639	0.39132	0.197444	0.84348
Tgfb2	175.897	-0.0615302	0.313686	-0.196153	0.844491
Cd69	27.5835	-0.0624942	0.319748	-0.195449	0.845042
Txk	8.80338	0.0845568	0.440089	0.192136	0.847636
Itga1	648.265	-0.0465864	0.247561	-0.188182	0.850734
Cxcl12	1876.15	0.080045	0.425477	0.18813	0.850775
Il12rb1	13.3517	0.0612201	0.331125	0.184885	0.853319
Bid	57.6393	-0.0690157	0.375594	-0.183751	0.854209
Oasl1	114.78	-0.0734944	0.405183	-0.181386	0.856065
Cxcr5	5.34029	-0.0812064	0.471184	-0.172345	0.863166
F2rl1	89.8946	0.0520884	0.302572	0.172152	0.863318
Il10	9.04211	0.0629612	0.37244	0.169051	0.865757
Traf2	513.086	-0.0311356	0.184601	-0.168664	0.866061
Il1rl2	415.224	-0.0455129	0.279009	-0.163123	0.870421
Cx3cl1	105.945	0.0522123	0.324428	0.160937	0.872143
Tnfrsf8	8.58534	-0.0573134	0.371013	-0.154478	0.877233
Cd44	43.233	0.0457788	0.298451	0.153388	0.878092
Cd79b	8.49303	-0.059369	0.392266	-0.151349	0.879701
Pik3cd	76.6134	-0.0559817	0.375837	-0.148952	0.881591
Cfd	164.046	0.10067	0.676528	0.148803	0.881709
Creb1	271.713	0.0362676	0.247339	0.146631	0.883423
Siglec1	63.2047	-0.0707884	0.487286	-0.145271	0.884497
Gtf3c1	833.7	0.0330534	0.238505	0.138586	0.889778
Pdcd1lg2	23.6344	0.0617113	0.447426	0.137925	0.8903
Mpped1	5.99653	-0.0598399	0.438438	-0.136484	0.891438
Card9	23.9877	-0.0437232	0.324291	-0.134827	0.892749
Lta	15.4234	-0.047683	0.354588	-0.134474	0.893027
Cdk1	25.6505	0.0580382	0.436621	0.132926	0.894252
Egr2	34.8218	-0.0474307	0.365752	-0.12968	0.89682
Il12b	16.1646	-0.0708417	0.54981	-0.128848	0.897478
Gzmk	5.96362	0.0521918	0.415211	0.125699	0.89997
Cd7	18.8516	0.0430897	0.36113	0.119319	0.905022
Rps6	382.678	0.039356	0.331071	0.118875	0.905374
CD209e	18.1014	-0.0702502	0.59842	-0.117393	0.906549
Il1rn	1276.48	0.0486064	0.414761	0.117191	0.906708
Ltf	12.5528	0.053282	0.468802	0.113656	0.909511
Tirap	149.805	-0.0288255	0.254559	-0.113237	0.909843
Map3k5	421.984	0.0293772	0.279452	0.105124	0.916277
Rrad	134.754	0.0585305	0.571204	0.102469	0.918385
Mpo	12.0426	0.0440401	0.430992	0.102183	0.918611
Ifnar1	1049.42	0.0186567	0.184223	0.101272	0.919334
Cd27	8.75511	0.0444226	0.445223	0.0997761	0.920522
Ccl22	55.1862	-0.0547598	0.555458	-0.098585	0.921468
Cyfip2	125.824	-0.0336725	0.355276	-0.0947785	0.924491
Tnfrsf14	138.501	-0.0343016	0.369183	-0.0929122	0.925973
Tnfrsf9	16.4425	0.0485213	0.524569	0.0924974	0.926303
Cd1d2	14.4334	-0.0385701	0.437576	-0.0881449	0.929761
Tyk2	233.017	0.023192	0.269223	0.0861441	0.931352
Nt5e	205.586	0.0307672	0.357692	0.086016	0.931454
Cd3g	35.5066	-0.0345396	0.424103	-0.0814415	0.935091
Abcg1	424.37	0.0201034	0.255599	0.0786522	0.937309
Lrp1	3106.26	0.0188724	0.243895	0.0773795	0.938322
Klrc1	16.5162	-0.0267639	0.35474	-0.0754464	0.93986
Colec12	335.147	0.0233201	0.311948	0.0747563	0.940409
Card11	13.2667	-0.0256262	0.348579	-0.0735164	0.941395
Egr3	148.236	-0.0254974	0.366575	-0.0695556	0.944547
Tlr5	34.1609	0.0186329	0.272113	0.0684747	0.945408
Ctsw	17.5922	-0.0239638	0.355549	-0.0673993	0.946264
Ccl19	94.9697	0.029449	0.473408	0.0622064	0.950398
Il7	31.7286	0.0222569	0.366911	0.0606603	0.95163
Stat4	10.336	0.0234723	0.389116	0.0603221	0.951899
Icam1	276.567	-0.00991945	0.18216	-0.0544546	0.956573
Klra6	14.676	-0.0197731	0.412985	-0.0478785	0.961813
Tbp	186.947	-0.0123711	0.274577	-0.0450551	0.964063
Usp9y	6.63849	0.0193062	0.434993	0.0443829	0.964599
Cxcr3	24.8589	0.0116744	0.277343	0.0420937	0.966424
Cx3cr1	123.118	-0.0151725	0.38076	-0.039848	0.968214
Klra15	7.03524	0.0187519	0.491594	0.0381452	0.969572
Cd274	180.332	0.0139146	0.392006	0.0354958	0.971684
Mapk11	97.4127	-0.00999941	0.290447	-0.0344277	0.972536
Atg5	248.038	0.00869163	0.294427	0.0295205	0.976449
Serpinb2	1594.21	0.0115944	0.443819	0.0261241	0.979158
Ulbp1	24.6212	-0.0110853	0.541977	-0.0204534	0.983682
Tbx21	16.8166	0.00774663	0.383991	0.020174	0.983905
Icosl	283.015	-0.00632459	0.33912	-0.01865	0.98512
Maf	478.702	0.00488071	0.294775	0.0165574	0.98679
S100a8	23587.8	0.0113305	0.694913	0.016305	0.986991
Angpt2	151.293	0.0036834	0.331819	0.0111007	0.991143
Klrb1c	9.16836	0.00397749	0.37162	0.0107031	0.99146
Defb1	874.948	0.00453326	0.439725	0.0103093	0.991775
Klrg1	16.1649	-0.00343136	0.368405	-0.0093141	0.992569
Apoe	5167.71	-0.00259337	0.352544	-0.00735617	0.994131
Cd19	5.9445	0.00103572	0.43701	0.00237	0.998109
Amica1	169.257	-0.0441636	0.449598	-0.098229	NA
Nefl	60.8395	3.35538	1.01438	3.30783	NA

## Sheet: GOF vs WT
Supplementary Table S5
Nanostring PanCancer Immune Profiling GOF vs WT
	baseMean	log2FoldChange	lfcSE	stat	pvalue
Egr1	1130.29	1.30279	0.303109	4.29808	1.72286e-05
Msln	219.218	-2.88509	0.842412	-3.4248	0.000615255
Fos	1146.25	1.11387	0.34357	3.24203	0.0011868
C1qb	481.859	-1.28378	0.410523	-3.12719	0.00176488
Dmbt1	7344.86	-5.13913	1.67322	-3.07141	0.00213053
Ythdf2	838.633	0.812112	0.268181	3.02822	0.00246
C3ar1	284.431	-1.44223	0.47909	-3.01036	0.00260939
Cfd	164.046	-2.00545	0.673241	-2.97879	0.00289387
Ccl6	351.488	-1.4438	0.493872	-2.92343	0.003462
Il1rn	1276.48	1.20627	0.415149	2.90562	0.00366525
Chit1	4370.23	1.05646	0.370519	2.85131	0.00435401
Tnfsf11	33.9229	-2.05798	0.724174	-2.84183	0.00448548
Sf3a3	696.335	0.697156	0.25038	2.78439	0.00536278
Mrc1	485.519	-1.33165	0.483182	-2.756	0.00585128
Il22ra1	241.806	1.02118	0.371263	2.75055	0.00594944
Tnfaip3	214.018	0.903784	0.331885	2.72318	0.0064656
Camp	12.3059	-1.56991	0.578427	-2.7141	0.00664564
Siglec1	63.2047	-1.2853	0.481419	-2.66982	0.00758927
Rrad	134.754	-1.50723	0.56798	-2.65367	0.00796211
Cd38	201.418	-1.0096	0.381014	-2.64976	0.00805482
Ccl20	36.8329	1.35904	0.51853	2.62096	0.00876829
Jun	1055.14	0.495889	0.190204	2.60714	0.00913013
Ccl9	808.646	-1.39761	0.541608	-2.58048	0.00986618
Saa1	70.3261	-1.3936	0.540079	-2.58037	0.00986958
Anxa1	10115.7	1.09457	0.433636	2.52416	0.0115974
Fn1	2960.64	-1.1717	0.467049	-2.50874	0.0121162
Itgam	251.08	-1.05602	0.423045	-2.49623	0.012552
Il23a	23.4849	0.93963	0.377986	2.48589	0.0129229
Serpinb2	1594.21	1.10322	0.444084	2.48426	0.012982
Tollip	1300.69	0.552123	0.222584	2.48051	0.0131194
Smn1	643.833	0.763274	0.308564	2.47363	0.0133747
Myc	953.457	0.946061	0.388484	2.43526	0.014881
Cd37	128.777	-0.920714	0.378526	-2.43237	0.0150005
Fcgr3	130.228	-1.23758	0.510376	-2.42484	0.0153152
Ceacam1	259.395	0.948897	0.391531	2.42356	0.0153694
Ltbr	787.392	0.599913	0.247894	2.42004	0.0155188
Spp1	548.802	-2.28986	0.949485	-2.41169	0.0158788
Emr1	197.903	-1.28833	0.535971	-2.40373	0.0162286
Isg15	80.3791	1.47725	0.616907	2.39461	0.0166382
Nfkbia	1446.02	0.699622	0.293632	2.38265	0.0171886
Itgb2	266.462	-1.14925	0.485928	-2.36506	0.018027
Tnfrsf1a	2738.68	0.48696	0.207734	2.34415	0.0190703
Tnfrsf11b	12.5157	-0.89954	0.385277	-2.33479	0.0195546
Fcgr1	75.8807	-1.00824	0.434069	-2.32275	0.0201924
Trem2	45.9007	-1.05915	0.45645	-2.32041	0.0203189
C1qa	1043.71	-0.861924	0.373084	-2.31027	0.0208731
Clec4n	98.057	-1.45034	0.633476	-2.2895	0.0220503
Ccl12	55.2239	-1.38736	0.60748	-2.28379	0.0223839
Cd180	41.2764	-1.08716	0.478222	-2.27333	0.0230064
Isg20	307.25	-0.701498	0.313726	-2.23602	0.0253504
Lgals3	6385.34	0.833145	0.374136	2.22685	0.0259573
Polr1b	231.969	0.680298	0.306944	2.21636	0.0266669
Bcl2l1	676.819	0.601517	0.271582	2.21486	0.0267698
Rela	697.528	0.495	0.223554	2.21423	0.026813
Fcgr2b	451.578	-0.979714	0.443229	-2.2104	0.0270774
Anp32b	3492.36	0.467366	0.212466	2.19972	0.0278267
Dock9	1351.34	0.514732	0.236517	2.1763	0.0295327
Angpt1	37.0339	-1.0687	0.492048	-2.17194	0.0298603
Gusb	284.3	-0.478906	0.220684	-2.1701	0.0299993
Egfr	826.578	0.548283	0.252929	2.16774	0.0301787
Smad2	326.938	0.469932	0.217338	2.16222	0.0306014
Cd69	27.5835	0.721121	0.334091	2.15846	0.0308924
Ncr1	6.19041	0.998089	0.462559	2.15776	0.0309467
Hprt	3018.69	0.658391	0.306038	2.15134	0.0314496
Ido1	8.99509	-0.831976	0.387238	-2.14849	0.0316749
Il2rg	71.8715	-0.940846	0.43845	-2.14584	0.0318853
H2-D1	9342.47	0.559769	0.261153	2.14345	0.032077
Nod2	313.069	0.792591	0.37005	2.14185	0.0322058
Tnfrsf11a	77.3355	-0.563714	0.263903	-2.13606	0.0326742
Tnfrsf13b	19.1189	-0.929813	0.436603	-2.12965	0.0332002
Cd9	7296.87	0.637458	0.299842	2.12598	0.0335051
Stat3	3008.38	0.455142	0.215805	2.10905	0.0349404
Col3a1	3685.81	-1.16169	0.553269	-2.09968	0.0357573
Lcp1	567.705	-0.957493	0.456076	-2.09942	0.03578
Tmem173	65.1772	-0.890675	0.424689	-2.09724	0.0359724
Nos2	19.9746	-0.736363	0.35221	-2.09069	0.0365556
Msr1	78.6966	-1.13997	0.545405	-2.09014	0.0366057
Btk	54.4264	-0.797783	0.383372	-2.08096	0.0374371
Lyz2	7048.06	-1.05362	0.510006	-2.0659	0.0388383
Nt5e	205.586	0.741862	0.359178	2.06544	0.038881
Yy1	1229.82	0.593923	0.287911	2.06287	0.0391248
F13a1	353.563	-0.825293	0.401794	-2.05402	0.0399739
S100a8	23587.8	1.42662	0.694929	2.0529	0.0400826
Erbb2	2051.14	0.563784	0.274849	2.05125	0.0402423
Nup107	482.367	0.534245	0.261772	2.04088	0.0412632
Cd244	40.0453	-0.890184	0.437635	-2.03408	0.0419437
Tlr8	77.8895	-0.860169	0.422997	-2.03351	0.0420011
Lyn	306.272	-0.404069	0.198885	-2.03167	0.0421871
Muc1	59.3123	0.827151	0.408738	2.02367	0.0430041
Vcam1	68.5952	-0.983334	0.485991	-2.02336	0.0430363
Itch	1712.03	0.327242	0.16177	2.02289	0.0430844
Fcer1g	314.32	-0.838749	0.417609	-2.00845	0.0445951
Col1a1	2331.62	-1.08663	0.544776	-1.99463	0.0460829
Ikbkb	736.766	0.472866	0.237529	1.99077	0.0465059
Ep300	1109.28	0.385971	0.193957	1.98999	0.0465923
Tnfrsf1b	345.222	-0.824448	0.414574	-1.98866	0.0467383
Itgb4	2861.46	0.710518	0.357307	1.98854	0.0467522
Ticam2	23.6972	-0.778949	0.392565	-1.98425	0.0472276
Atg16l1	495.672	0.548683	0.277607	1.97648	0.0481008
Cd84	152.785	-0.802171	0.409263	-1.96004	0.0499912
Thy1	492.748	-0.78997	0.403749	-1.95659	0.0503962
Tlr6	29.0633	-0.583641	0.29897	-1.95217	0.0509179
Birc5	144.945	0.652735	0.335145	1.94762	0.0514609
Ccl28	33.1385	-1.38364	0.712828	-1.94105	0.0522517
C7	56.53	1.43079	0.739176	1.93565	0.0529104
Crebbp	1726.59	0.485743	0.251503	1.93136	0.053438
Icam4	22.7596	-0.677458	0.350969	-1.93025	0.053576
Lta	15.4234	0.729684	0.378557	1.92754	0.0539123
H2-DMb1	80.1399	-0.7802	0.404891	-1.92694	0.0539871
Nfkb1	939.44	0.374929	0.194759	1.92509	0.0542177
Il1rl1	179.517	-1.26949	0.662899	-1.91505	0.0554857
Il17f	28.5633	0.888656	0.464493	1.91317	0.0557258
Il6	29.8701	-1.48781	0.778399	-1.91137	0.0559572
Cdh1	3747.7	0.622538	0.327327	1.90188	0.0571867
Tlr2	113.875	-0.748332	0.394577	-1.89654	0.0578884
Ambp	9.7233	0.93802	0.495082	1.89468	0.0581354
Itga2b	103.245	0.583364	0.307966	1.89425	0.0581923
Fcgr4	40.4519	-1.02463	0.541739	-1.89137	0.058575
Cyfip2	125.824	-0.66527	0.35311	-1.88403	0.0595608
Jak1	1531.47	0.287282	0.152535	1.88338	0.0596483
Ccl7	55.406	-1.13889	0.605393	-1.88125	0.059938
Mnx1	6.8502	-0.7812	0.41972	-1.86124	0.0627102
Hif1a	10213	0.737504	0.398545	1.85049	0.0642428
Nlrc5	399.415	0.657093	0.355459	1.84857	0.0645192
Hc	6.29237	0.796868	0.433636	1.83764	0.0661154
Defb1	874.948	0.808029	0.440052	1.83621	0.066326
Smad4	963.995	0.452511	0.247418	1.82893	0.0674098
Csf2	13.7748	-0.863342	0.475514	-1.8156	0.0694324
Ccrl2	122.4	0.713618	0.393071	1.81549	0.0694481
H2-Ob	17.2013	-0.714362	0.394685	-1.80996	0.0703026
Ewsr1	2946.34	0.567346	0.314013	1.80676	0.0707999
Ly86	84.4358	-0.791515	0.438514	-1.805	0.0710755
Ccr5	93.1885	-1.1554	0.641025	-1.80242	0.0714788
Mx1	8.70269	0.704073	0.393884	1.78751	0.0738549
Batf	43.5681	-0.56954	0.318643	-1.78739	0.0738743
Angpt2	151.293	0.59518	0.333548	1.78439	0.0743603
Gzmb	14.2687	0.769191	0.433258	1.77536	0.075838
H2-Eb1	1348.76	-0.986467	0.555695	-1.77519	0.075866
Psma2	2716.1	0.516029	0.290888	1.77398	0.0760667
Klra27	9.19185	-0.835829	0.471189	-1.77387	0.0760847
Ccr1	124.666	-0.835365	0.4726	-1.76759	0.0771289
Nfatc3	383.849	0.365207	0.207233	1.7623	0.0780188
Icos	52.0698	0.597214	0.339273	1.76027	0.0783617
Sap130	424.212	0.435622	0.247923	1.75709	0.0789033
Slamf7	24.1467	-0.741837	0.424085	-1.74926	0.0802454
Il21r	21.3184	-0.765945	0.438216	-1.74787	0.0804859
Tfrc	1925.71	0.513373	0.293761	1.74759	0.0805351
Il13	8.57593	-0.736718	0.423586	-1.73924	0.081992
Chuk	1037.88	0.317276	0.182969	1.73404	0.0829118
Stat4	10.336	-0.642263	0.370826	-1.73198	0.0832768
Abl1	616.65	0.374173	0.216456	1.72863	0.0838749
Mst1r	295.583	0.497845	0.288038	1.7284	0.0839159
Il22	16.2036	0.701572	0.406161	1.72732	0.0841094
Cybb	197.152	-0.676366	0.392675	-1.72246	0.0849871
Clec4a2	38.6234	-0.893201	0.521578	-1.7125	0.0868049
Il13ra1	1038.09	0.474592	0.277372	1.71103	0.0870747
Ccr9	47.3711	0.88289	0.519124	1.70073	0.0889933
Ifitm2	6288.62	0.373702	0.220301	1.69633	0.0898241
H2-M3	101.273	-0.535248	0.316149	-1.69302	0.0904511
H2-K1	3945.69	0.466451	0.275785	1.69136	0.0907688
C5ar1	205.195	-0.837083	0.496798	-1.68496	0.091997
Il1a	242.533	0.692184	0.411115	1.68368	0.0922443
Icosl	283.015	0.572223	0.339991	1.68305	0.0923651
Igf1r	1544.32	0.525025	0.312334	1.68097	0.0927686
Clec5a	37.5195	-0.704268	0.422582	-1.66658	0.0955975
Reps1	655.186	0.511476	0.30697	1.66621	0.0956716
Mapk14	2436.99	0.380385	0.228701	1.66324	0.0962645
Atf2	483.405	0.454504	0.27354	1.66157	0.0965999
Jak2	951.921	0.433329	0.261381	1.65785	0.0973486
Irf8	83.3803	-0.47563	0.288608	-1.64801	0.0993506
Ccr6	27.4048	0.744626	0.452184	1.64673	0.0996132
Prdm1	726.522	0.584707	0.357111	1.63732	0.101563
Il21	9.99072	-0.643808	0.394341	-1.63262	0.10255
Traf6	865.954	0.660399	0.405007	1.63059	0.102977
Tapbp	1288.52	0.324816	0.199766	1.62598	0.103953
Creb5	233.931	0.470931	0.289987	1.62397	0.104382
Cdkn1a	3846.75	0.525458	0.324099	1.62129	0.104956
Pnma1	42.4589	0.563021	0.348097	1.61742	0.105787
Snai1	63.2281	-0.560271	0.346963	-1.61479	0.106357
H2-Aa	1664.07	-0.794915	0.494472	-1.6076	0.107922
Prkcd	1852.74	0.383064	0.239191	1.6015	0.109267
Igll1	8.53212	0.66675	0.416945	1.59913	0.109792
Vim	5910.94	-0.501839	0.314082	-1.5978	0.110088
Lif	107.295	-0.92968	0.582172	-1.59692	0.110284
Lag3	29.997	0.494534	0.310049	1.59502	0.110708
Il13ra2	11.3704	0.710747	0.446822	1.59067	0.111683
Icam1	276.567	0.290958	0.182945	1.59041	0.111742
Ifitm1	355.177	-0.512828	0.323201	-1.58672	0.112577
Bcl10	1319.3	0.480275	0.302722	1.58652	0.112621
Pin1	171.131	0.46059	0.290725	1.58428	0.113129
Il12rb1	13.3517	0.553762	0.351089	1.57727	0.114733
Hck	66.7054	-0.77372	0.491323	-1.57477	0.11531
Il1rl2	415.224	0.4401	0.279585	1.57412	0.115459
Il17a	22.5767	1.00056	0.635669	1.57402	0.115482
Havcr2	23.4785	0.855431	0.545085	1.56935	0.116566
Il3ra	125.966	-0.5198	0.33218	-1.56481	0.117627
Oas3	35.7671	0.709493	0.453668	1.56391	0.11784
Cd96	10.0896	-0.553865	0.354207	-1.56368	0.117894
Vhl	232.243	0.409361	0.261914	1.56296	0.118061
Hamp	10.2008	0.853603	0.546159	1.56292	0.118071
Pik3cd	76.6134	-0.579672	0.373069	-1.55379	0.120234
Cd99	2432.27	0.461633	0.298415	1.54695	0.121876
H2-Q2	14.6311	-0.770401	0.499571	-1.54212	0.123043
Cd40	34.5831	-0.612939	0.397604	-1.54158	0.123175
Tfe3	442.256	0.382526	0.24852	1.53922	0.123751
Csf1r	387.588	-0.578119	0.376381	-1.53599	0.12454
Cfp	148.447	-0.63752	0.416298	-1.5314	0.12567
Pvrl2	249.817	0.435828	0.285133	1.52851	0.126386
Bst1	102.058	-0.631583	0.415996	-1.51824	0.128953
Pou2f2	35.245	-0.631827	0.417823	-1.51219	0.130486
Tnfrsf4	44.1875	0.502181	0.333238	1.50697	0.131817
Rpl19	19679.6	0.451954	0.300223	1.5054	0.132222
Smad3	768.36	0.426452	0.283397	1.50479	0.132379
Ccl24	57.0392	-1.10727	0.736269	-1.50389	0.13261
Colec12	335.147	-0.467719	0.311184	-1.50303	0.132831
Masp2	11.457	0.529304	0.354745	1.49207	0.135681
Itga6	3971.74	0.602865	0.404239	1.49136	0.135867
Ikzf1	29.4366	-0.576775	0.387782	-1.48737	0.136917
Nubp1	388.538	0.357082	0.240846	1.48262	0.138176
Il9	6.12297	0.646697	0.437004	1.47984	0.138915
Ppia	17740.8	0.380212	0.257358	1.47737	0.139578
Rel	309.33	0.360087	0.243753	1.47726	0.139605
Sbno2	1039.67	0.398809	0.270395	1.47492	0.140235
Ctss	983.065	-0.64009	0.437262	-1.46386	0.143232
Lck	34.4001	0.55836	0.382915	1.45818	0.14479
Itga4	68.477	-0.64365	0.441735	-1.4571	0.14509
Tlr1	33.1301	-0.70186	0.481889	-1.45648	0.145261
Tnfrsf8	8.58534	0.592338	0.406927	1.45563	0.145494
Csf2rb	209.011	-0.630412	0.433766	-1.45335	0.146127
Tlr5	34.1609	-0.387433	0.266713	-1.45262	0.146329
Cd6	14.9615	0.586432	0.404891	1.44837	0.147514
H2-Ea-ps	12.6586	1.3203	0.912232	1.44733	0.147805
Sell	63.7534	-0.815892	0.56693	-1.43914	0.150111
Litaf	559.353	0.355769	0.247817	1.43561	0.151113
Fas	230.254	0.599713	0.420322	1.42679	0.15364
Axl	1361.86	-0.353963	0.249632	-1.41794	0.156209
Tubb5	2777.9	-0.540655	0.38312	-1.41119	0.158189
Cfb	88.689	-0.670259	0.476732	-1.40595	0.15974
Rorc	1592.52	0.740835	0.527319	1.40491	0.160049
Il11ra1	189.057	-0.456861	0.326337	-1.39997	0.161522
Selplg	224.788	-0.611984	0.441341	-1.38665	0.16555
Syk	248.47	-0.373842	0.269977	-1.38472	0.166139
Hdac3	682.131	0.272446	0.196968	1.38319	0.166605
Pparg	51.1728	0.487167	0.352229	1.3831	0.166634
Ccl5	25.6517	-0.816091	0.592274	-1.37789	0.168236
Alcam	247.103	0.476229	0.350381	1.35917	0.174091
Adora2a	22.5159	-0.483043	0.355956	-1.35703	0.174772
Ccl11	819.504	0.462141	0.340694	1.35647	0.17495
Ly9	20.9978	-0.484377	0.358127	-1.35253	0.176207
Slc11a1	63.0575	-0.626162	0.465349	-1.34558	0.178439
Tnfsf10	65.7685	-0.69699	0.519003	-1.34294	0.179292
Ifih1	236.785	0.397362	0.296336	1.34092	0.179948
Irak3	226.711	0.402883	0.300544	1.34051	0.180078
Ctsw	17.5922	0.494329	0.368874	1.3401	0.180212
Cxcr4	122.047	-0.527096	0.393754	-1.33864	0.180687
Notch1	1509.81	0.341464	0.255888	1.33443	0.182064
Tnfsf12	204.841	-0.469882	0.352161	-1.33428	0.182112
Cd48	71.1282	-0.600611	0.451655	-1.3298	0.183584
Pax5	8.64996	-0.52916	0.400348	-1.32175	0.186251
Ncf4	129.409	-0.534329	0.405823	-1.31666	0.187954
Ifnb1	6.48237	0.576564	0.438413	1.31512	0.18847
Irak2	425.784	0.290338	0.22103	1.31357	0.188991
Atm	290.827	0.317953	0.242239	1.31256	0.189332
Ifngr1	769.499	0.372086	0.283842	1.31089	0.189895
Ccl25	56.443	0.466737	0.356498	1.30923	0.190457
Ilf3	435.041	0.328477	0.250986	1.30875	0.19062
Fcer2a	6.29695	-0.578595	0.442353	-1.308	0.190875
Cxcl5	198.807	-1.07842	0.83301	-1.2946	0.195458
Ptprc	203.282	-0.619761	0.481937	-1.28598	0.19845
Cd8b1	7.71345	0.602186	0.469031	1.28389	0.199179
Il24	113.032	-1.36124	1.06238	-1.28131	0.200084
Ccl26	7.39524	-0.526299	0.41155	-1.27882	0.200961
Itgax	42.9559	-0.527856	0.412845	-1.27858	0.201044
Cdk1	25.6505	0.566122	0.443596	1.27621	0.201881
Map2k4	809.628	0.245808	0.192618	1.27614	0.201906
Casp3	141.711	0.303558	0.238314	1.27377	0.202745
Xcr1	11.9889	0.461128	0.362126	1.27339	0.202879
C1qbp	2121.8	0.256859	0.202132	1.27075	0.203818
Tgfbr1	864.845	0.275625	0.216996	1.27018	0.204019
Polr2a	948.304	0.366613	0.288752	1.26964	0.204211
Itgae	59.5623	0.424739	0.338417	1.25508	0.20945
Psen2	195.448	0.326103	0.26037	1.25246	0.210401
Abcf1	573.339	0.308965	0.246754	1.25212	0.210527
A2m	23.3252	0.681311	0.544496	1.25127	0.210836
Nrp1	733.961	-0.436953	0.35197	-1.24145	0.21444
Bcl2	167.349	0.306369	0.246812	1.2413	0.214494
Tbx21	16.8166	-0.46523	0.374881	-1.24101	0.214603
Cd33	85.8814	-0.526074	0.425009	-1.2378	0.215792
H2-Ab1	2246.34	-0.567641	0.458662	-1.2376	0.215864
C8a	4.28908	0.607308	0.491354	1.23599	0.216463
Il25	10.3627	0.443348	0.359188	1.23431	0.217088
Thbs1	984.762	-0.660964	0.536674	-1.23159	0.218101
Cd83	67.611	-0.607677	0.494126	-1.2298	0.218771
Epsti1	6.47024	-0.562361	0.458925	-1.22539	0.220429
Stat6	1922.9	0.243363	0.198771	1.22434	0.220825
Tnfrsf10b	136.289	0.442751	0.362472	1.22148	0.221906
Mif	9528.52	0.329959	0.272167	1.21234	0.225383
Dll4	175.5	0.366587	0.30358	1.20755	0.227222
Psen1	1488.1	0.275287	0.228825	1.20305	0.228958
Tgfb3	372.598	-0.288864	0.240379	-1.2017	0.229479
Pik3cg	46.108	-0.372595	0.311821	-1.1949	0.232127
C1ra	627.907	-0.332857	0.279128	-1.19249	0.233069
App	4901.93	0.26496	0.222579	1.19041	0.233887
Edc3	248.766	0.267972	0.225305	1.18937	0.234293
Map3k5	421.984	0.33234	0.279769	1.18791	0.234869
Sh2b2	63.4247	0.45385	0.382248	1.18732	0.235102
Tank	562.011	0.318971	0.269048	1.18555	0.235799
Tdo2	10.2898	0.447464	0.378423	1.18244	0.23703
Klra1	8.28975	-0.463213	0.393271	-1.17785	0.238858
Ikzf2	242.178	0.372311	0.316126	1.17773	0.238903
Ctsh	751.613	0.355189	0.303775	1.16925	0.242302
Csf1	257.836	-0.397061	0.340412	-1.16641	0.243448
Il6ra	872.994	0.360496	0.309358	1.16531	0.243896
Klrd1	27.4557	-0.362876	0.313218	-1.15854	0.246643
Cd34	1532.65	-0.393092	0.339311	-1.1585	0.24666
Lbp	185.548	-0.375089	0.3244	-1.15626	0.247577
Cd200r1	25.3202	-0.565365	0.491401	-1.15052	0.249931
Ccr7	31.8972	0.352762	0.307438	1.14742	0.251206
Myd88	432.049	0.271622	0.237669	1.14286	0.253096
Tnfrsf9	16.4425	-0.587307	0.51413	-1.14233	0.253316
Il10ra	80.4678	-0.475665	0.416797	-1.14124	0.25377
Hsd11b1	188.728	0.428259	0.375264	1.14122	0.253778
Klrb1c	9.16836	0.450199	0.395849	1.1373	0.255412
Cxcl12	1876.15	-0.479681	0.425362	-1.1277	0.259446
Cd46	6.97456	-0.541165	0.480671	-1.12585	0.260228
Il15	83.0329	0.424984	0.37783	1.1248	0.260672
Cd164	3292.32	0.307108	0.273233	1.12398	0.261023
Map4k2	215.102	0.29392	0.263299	1.1163	0.264294
Arg2	71.1352	0.530221	0.475816	1.11434	0.265132
Tnfrsf14	138.501	-0.406343	0.367987	-1.10423	0.269493
Trem1	52.1357	-0.647415	0.590628	-1.09615	0.273015
Ly96	221.892	0.251443	0.233075	1.07881	0.280673
Tap2	326.033	0.241422	0.223949	1.07803	0.281022
Cd79b	8.49303	0.450704	0.418358	1.07732	0.281339
G6pdx	3764.67	0.396283	0.368791	1.07455	0.282578
H2-Dma	119.107	-0.443176	0.412498	-1.07437	0.282656
Ciita	59.4013	-0.61953	0.578744	-1.07047	0.284406
Irf4	41.7315	-0.453861	0.42766	-1.06127	0.288569
Klra21	12.4758	0.392854	0.37049	1.06036	0.28898
Mapk3	2155.21	0.267022	0.252016	1.05954	0.289352
Tbk1	331.085	0.231267	0.218321	1.0593	0.289464
Mapk8	435.977	0.273249	0.258304	1.05786	0.290119
Il17ra	307.227	0.276912	0.262094	1.05654	0.290724
Lilra5	14.2318	-0.409535	0.38775	-1.05618	0.290885
Ikbkg	349.331	0.226415	0.215965	1.04839	0.29446
Il7	31.7286	-0.375936	0.362056	-1.03834	0.299114
Ctsl	643.27	0.343822	0.331829	1.03614	0.300136
Mcam	452.599	0.227912	0.220533	1.03346	0.30139
Cd68	639.016	-0.357355	0.346579	-1.03109	0.302498
Ccl22	55.1862	-0.569764	0.552831	-1.03063	0.302715
Csf3r	118.136	-0.591444	0.575862	-1.02706	0.304393
Gtf3c1	833.7	0.242314	0.238616	1.0155	0.309869
Gbp5	97.3182	-0.622555	0.61916	-1.00548	0.314665
Mbl2	6.67703	-0.415166	0.413	-1.00525	0.314779
Vegfc	101.408	-0.335817	0.334732	-1.00324	0.315746
Abcg1	424.37	0.253232	0.255842	0.989796	0.322274
Map2k1	1083.49	0.180986	0.182877	0.989657	0.322342
Ebi3	25.4268	-0.351246	0.357144	-0.983487	0.325368
Il15ra	224.627	0.260102	0.264776	0.982345	0.32593
Fpr2	77.835	-0.614018	0.626297	-0.980396	0.326891
Mapk11	97.4127	-0.282427	0.288888	-0.977635	0.328255
Fcer1a	58.344	-0.416386	0.427523	-0.97395	0.330081
Runx3	27.969	-0.370249	0.38107	-0.971603	0.331248
Cd8a	9.034	0.397457	0.41263	0.963231	0.335432
Aire	13.3973	0.368328	0.382502	0.962943	0.335576
Cd22	9.42907	-0.486161	0.505935	-0.960917	0.336594
Usp9y	6.63849	-0.404074	0.421918	-0.957706	0.338211
Lamp2	4409.48	0.216331	0.226315	0.955885	0.339131
Cd47	785.09	0.188986	0.19791	0.95491	0.339623
Prf1	6.67698	-0.429151	0.449445	-0.954848	0.339655
Csf3	55.6002	-0.668901	0.70175	-0.95319	0.340494
Psmb7	1535.19	0.242547	0.256705	0.944848	0.344736
Egr3	148.236	0.347165	0.367474	0.944734	0.344795
Fap	146.249	-0.41541	0.441227	-0.941488	0.346455
Dusp6	1768.08	0.406348	0.433773	0.936776	0.348874
Pecam1	1232.37	0.277665	0.296591	0.936186	0.349177
Cd1d1	113.96	-0.347542	0.372884	-0.932038	0.351317
Gpi1	8621.93	0.22411	0.24065	0.931269	0.351715
F2rl1	89.8946	0.282365	0.303656	0.929884	0.352431
Cd74	4015.72	-0.467252	0.508158	-0.9195	0.357834
Cd2	19.6227	-0.334589	0.364169	-0.918774	0.358214
Cd97	531.871	-0.273754	0.298878	-0.915938	0.359699
Cmah	85.0253	-0.531166	0.580523	-0.914978	0.360203
Cxcr1	5.63593	-0.436755	0.482043	-0.90605	0.364909
Ctla4	59.7209	0.301974	0.334218	0.903526	0.366247
Bmi1	206.49	-0.240467	0.266787	-0.901344	0.367405
Col4a1	1339.68	-0.304258	0.337718	-0.900922	0.36763
Tlr7	33.175	-0.381847	0.426864	-0.89454	0.371033
Tap1	614.172	0.295677	0.330902	0.893547	0.371564
Cmpk2	84.9102	-0.370176	0.416391	-0.889011	0.373997
Rsad2	46.5795	-0.358787	0.406234	-0.883202	0.377127
Runx1	571.502	-0.248302	0.282092	-0.880216	0.378742
Ccr2	214.777	-0.803677	0.91664	-0.876764	0.380615
Tnfsf13b	19.235	-0.337392	0.385178	-0.875938	0.381064
Cd28	24.1938	-0.319243	0.366284	-0.871573	0.383442
Tnfrsf12a	730.648	0.330488	0.379834	0.870083	0.384255
Cd79a	6.43904	-0.370045	0.426175	-0.868295	0.385233
Fyn	731.274	0.230543	0.266199	0.866054	0.386461
Hspb2	1091.46	-0.319306	0.368987	-0.865357	0.386843
Tnfsf15	9.56194	-0.308583	0.357499	-0.86317	0.388044
Cmklr1	319.046	-0.244033	0.282936	-0.862503	0.388411
Gfi1	13.409	-0.329043	0.382416	-0.860433	0.38955
Mavs	677.577	-0.211369	0.245695	-0.860287	0.389631
Ccl2	262.345	-0.532513	0.620522	-0.85817	0.390799
Map3k1	752.525	0.199456	0.232458	0.858029	0.390876
Nfatc1	264.452	0.197847	0.230768	0.857339	0.391257
Il34	632.205	0.254619	0.298279	0.853629	0.39331
Ptgdr2	14.1381	0.48213	0.566528	0.851026	0.394755
Cd5	274.592	0.247289	0.292518	0.845382	0.397898
Mapk1	1295.36	0.167632	0.200065	0.837888	0.402093
Aicda	8.67495	0.355297	0.424585	0.836811	0.402699
Gzma	31.5488	0.442049	0.530305	0.833575	0.404521
Cxcr2	73.2978	-0.365691	0.439507	-0.832048	0.405382
Ubc	18246.1	0.282677	0.34005	0.831279	0.405816
Xbp1	2225.68	0.193766	0.234213	0.827307	0.408063
Cd80	109.649	-0.321972	0.392824	-0.819635	0.412424
Tnfsf4	12.5323	-0.418234	0.51486	-0.812325	0.416605
Elk1	70.1919	0.211078	0.261573	0.806959	0.41969
Map3k7	1038.07	0.165444	0.205834	0.803776	0.421526
Ifi44	96.7864	0.491682	0.614782	0.799766	0.423846
Cxcl9	145.856	0.802747	1.00719	0.797016	0.425442
Clec7a	70.2835	-0.507276	0.637712	-0.795462	0.426345
Cx3cr1	123.118	-0.301367	0.379709	-0.793678	0.427383
Dusp4	187.293	-0.422828	0.535887	-0.789025	0.430098
Hras	59.7535	0.273043	0.346434	0.788152	0.430608
Itk	11.0262	0.313612	0.398683	0.786621	0.431504
Eomes	14.9003	-0.399487	0.50837	-0.785819	0.431974
Btla	13.0867	-0.267183	0.340128	-0.785535	0.43214
Eif2b4	621.816	0.161398	0.206345	0.782174	0.434112
Ripk2	180.559	0.155219	0.199929	0.776371	0.43753
Itgb1	3974.96	-0.140061	0.180413	-0.776333	0.437552
Itga2	155.319	0.333498	0.429677	0.776158	0.437656
Tnfsf14	24.2601	-0.295154	0.384173	-0.768284	0.442318
C6	47.4921	-0.415462	0.543269	-0.764745	0.444423
Tnfrsf18	38.7838	0.358136	0.468709	0.764089	0.444814
Tirap	149.805	0.194885	0.255273	0.763437	0.445203
Atf1	312.954	0.183193	0.240459	0.761844	0.446153
Tab1	581.61	0.164673	0.216914	0.759163	0.447755
Ifi44l	9.90214	0.332439	0.440964	0.753891	0.450915
Zfp13	59.9387	0.23592	0.313384	0.752813	0.451562
C8g	15.7185	-0.301271	0.402057	-0.749325	0.453662
Gzmm	53.6906	0.28747	0.385492	0.745721	0.455836
Il12a	22.37	-0.245871	0.330329	-0.744319	0.456683
Pou2af1	15.8574	-0.359845	0.484834	-0.742203	0.457964
Klra7	4.19736	-0.551555	0.744213	-0.741125	0.458617
Mefv	30.3553	-0.357256	0.482611	-0.740258	0.459143
Tbp	186.947	0.203525	0.275062	0.739924	0.459346
Twist1	145.348	-0.278285	0.376166	-0.739793	0.459425
Ifit1	74.9754	0.32648	0.441827	0.738933	0.459948
St6gal1	138.031	-0.195742	0.266318	-0.734992	0.462344
Card11	13.2667	0.263586	0.359753	0.732685	0.46375
Il5	20.77	-0.264543	0.361469	-0.731856	0.464256
Txnip	4906.5	0.344901	0.478066	0.721451	0.470632
Sele	102.735	-0.374906	0.521253	-0.71924	0.471993
Pdgfc	184.524	-0.279877	0.390669	-0.716403	0.473742
Il1r1	338.353	-0.194811	0.272611	-0.714611	0.47485
Mef2c	3175.5	-0.323278	0.452889	-0.713812	0.475343
Ticam1	139.703	0.172552	0.242753	0.710814	0.4772
Irf7	125.439	0.352729	0.497463	0.709055	0.47829
Oas2	115.99	0.34445	0.489905	0.703096	0.481996
Akt3	335.163	-0.1569	0.2233	-0.702642	0.482279
Cd3eap	175.689	0.204743	0.29207	0.701005	0.4833
Il1b	767.417	-0.631517	0.902275	-0.699916	0.48398
Klra6	14.676	-0.284293	0.40787	-0.697018	0.485792
Ifi27	1695.31	-0.174547	0.250821	-0.695903	0.486489
Klra4	23.8608	-0.32994	0.475881	-0.693324	0.488106
Atg10	194.372	-0.213783	0.308498	-0.692981	0.488321
Klra5	8.6633	-0.255178	0.370162	-0.689367	0.490592
Cd7	18.8516	0.252263	0.366511	0.688283	0.491275
F12	5.17357	0.305278	0.445022	0.685986	0.492722
Ms4a1	14.0267	0.256475	0.37423	0.685342	0.493128
Ecsit	543.463	0.201492	0.294404	0.684408	0.493718
Apoe	5167.71	-0.241257	0.352519	-0.684382	0.493734
Irak4	315.873	0.170421	0.249056	0.684267	0.493806
Mx2	33.0398	-0.272115	0.398272	-0.683241	0.494455
Cd200	325.768	-0.23866	0.349556	-0.682752	0.494764
CD209e	18.1014	-0.404788	0.593736	-0.681764	0.495388
Atg12	515.58	0.144032	0.211537	0.680883	0.495945
Cd63	5132.54	-0.130357	0.191516	-0.68066	0.496087
Klrc2	4.03704	-0.535385	0.786669	-0.680571	0.496143
Cebpb	3348.16	0.139185	0.204598	0.680284	0.496324
Hcst	35.1162	-0.272732	0.401409	-0.679437	0.496861
Cd53	32.219	-0.201696	0.297071	-0.678948	0.497171
Thbd	1605.9	0.162016	0.241313	0.671394	0.50197
Epcam	630.885	0.252548	0.37663	0.670546	0.50251
Il1r2	226.633	0.258501	0.386756	0.668383	0.503889
Il6st	966.007	0.11452	0.172122	0.665344	0.50583
Il4	8.45249	-0.278206	0.418783	-0.664321	0.506485
Cd81	5141.35	0.141767	0.214505	0.660902	0.508675
H2-Q10	50.2204	-0.313701	0.475002	-0.660421	0.508984
Itgal	82.8709	-0.22782	0.345114	-0.660128	0.509172
Nod1	551.495	-0.15639	0.237016	-0.659828	0.509364
Klrk1	21.9827	-0.291026	0.443332	-0.656452	0.511533
Ccl4	22.2625	-0.32323	0.492986	-0.655658	0.512044
Ltf	12.5528	-0.300699	0.461037	-0.652224	0.514257
Il17rb	36.4929	-0.218209	0.33508	-0.651214	0.514908
Tnfrsf17	13.0799	0.299094	0.461575	0.647985	0.516994
Tlr3	56.9051	-0.184777	0.285939	-0.646209	0.518144
Ccr4	7.72024	0.271108	0.420356	0.644949	0.518961
Traf2	513.086	0.117415	0.184747	0.635543	0.525075
Il18rap	33.1572	-0.285719	0.451084	-0.633407	0.526468
Ccl21a	1222.64	-0.345215	0.545186	-0.633206	0.526599
Egr2	34.8218	0.232848	0.368836	0.631306	0.52784
Timd4	36.455	-0.349791	0.556025	-0.629092	0.529289
Ulbp1	24.6212	-0.335583	0.538171	-0.623562	0.532915
Tcf7	151.725	0.225624	0.362426	0.622537	0.533589
Il19	109.571	0.45452	0.738812	0.615204	0.53842
Tpsab1	112.567	-0.400646	0.656804	-0.609993	0.541867
Maf	478.702	0.179792	0.294893	0.609686	0.54207
Cx3cl1	105.945	0.197423	0.324866	0.607704	0.543384
Il22ra2	23.9866	0.298765	0.494262	0.604467	0.545533
Ccl3	79.783	0.447492	0.74718	0.598908	0.549234
Ifna4	12.5801	-0.263853	0.440876	-0.598475	0.549523
Ms4a2	24.2504	0.185382	0.310545	0.596957	0.550536
Xaf1	270.041	-0.253924	0.425831	-0.596303	0.550973
Cfh	1271.36	0.248468	0.422219	0.588482	0.556209
Tie1	388.504	0.174635	0.29773	0.586557	0.557502
Alas1	2095.74	0.145191	0.251201	0.577986	0.563274
Casp1	559.308	0.266493	0.463364	0.575126	0.565206
Klrc1	16.5162	0.203987	0.361694	0.563977	0.57277
Tgfb1	962.944	0.153608	0.272859	0.562956	0.573465
Lrrn3	21.4293	0.219463	0.390653	0.561786	0.574262
Il11	24.2017	0.308921	0.550902	0.560755	0.574964
Cd59b	27.9173	-0.191011	0.344046	-0.555191	0.578764
Il4ra	964.472	0.231444	0.419563	0.55163	0.581202
Cfi	10.3968	0.19779	0.363612	0.543959	0.58647
Serping1	1782.43	-0.159246	0.293919	-0.541804	0.587954
Mill2	117.558	-0.212868	0.394894	-0.539052	0.589851
Irf5	327.662	-0.116055	0.215658	-0.538142	0.590479
Tlr4	327.487	0.117987	0.221233	0.533318	0.593814
Ctsg	7.49105	-0.214232	0.405714	-0.528037	0.597474
Cxcl15	4.95101	0.270011	0.513133	0.5262	0.598749
Cd70	12.1171	-0.200585	0.383173	-0.523484	0.600637
Stat5b	427.892	-0.121266	0.236294	-0.513201	0.607811
Pdgfrb	338.795	-0.149334	0.292875	-0.509889	0.610129
Lcn2	818.566	0.267565	0.525011	0.509637	0.610306
Cd207	63.0268	-0.268356	0.535716	-0.500929	0.616421
Mpped1	5.99653	0.230548	0.461424	0.499644	0.617325
Igf2r	1124.45	0.10188	0.204782	0.497505	0.618833
Slc7a11	665.023	0.370171	0.746986	0.495554	0.620209
Atg7	170.737	0.127004	0.257829	0.49259	0.622303
Ccnd3	308.314	0.106213	0.215683	0.492451	0.6224
Ccl27a	95.0709	-0.14235	0.290831	-0.489459	0.624517
C3	2153.98	-0.176733	0.361418	-0.488999	0.624842
Nlrp3	67.727	0.305181	0.628467	0.485596	0.627254
Ifnar1	1049.42	0.0878427	0.184227	0.476818	0.633492
Creb1	271.713	0.117883	0.247399	0.476488	0.633727
Blnk	507.581	-0.143162	0.301768	-0.474411	0.635207
Cd40lg	18.0724	0.183313	0.389582	0.470538	0.637971
Cxcl14	585.052	-0.196859	0.420785	-0.467838	0.639901
Psmb10	127.487	-0.127676	0.273932	-0.466085	0.641155
Psmb8	856.64	0.159169	0.34564	0.460503	0.645155
C9	8.63261	0.232261	0.50569	0.459295	0.646023
Sh2d1a	11.4949	-0.169169	0.3773	-0.448368	0.653887
Icam2	134.742	-0.190654	0.427086	-0.446407	0.655304
Cd3e	39.3078	0.173001	0.388691	0.445087	0.656257
Cr2	10.456	0.156759	0.353029	0.444041	0.657013
Bst2	360.943	-0.187124	0.421427	-0.444025	0.657025
Cdh5	553.223	0.122656	0.277973	0.44125	0.659032
Slamf1	18.2532	-0.174364	0.395342	-0.441046	0.65918
Tfeb	643.003	0.125274	0.284809	0.439855	0.660042
Ifna2	5.8829	-0.19671	0.447995	-0.43909	0.660597
Sigirr	93.8058	-0.125136	0.285381	-0.438487	0.661033
Cd27	8.75511	0.198963	0.454252	0.438001	0.661386
Gpr44	24.0292	0.169908	0.388897	0.436897	0.662186
Cxcl11	51.5306	-0.198256	0.454316	-0.436385	0.662558
Cd86	65.3465	0.124521	0.287344	0.43335	0.66476
Cd3g	35.5066	0.184478	0.426012	0.433034	0.66499
Spn	49.8345	0.155835	0.361389	0.431212	0.666314
Jam3	258.673	-0.146271	0.340234	-0.429911	0.66726
Bcl6	366.24	-0.130148	0.305054	-0.426638	0.669643
Ifi35	401.16	0.099654	0.23362	0.426565	0.669696
H2-Q1	7.65557	0.175743	0.414901	0.423579	0.671873
Il16	183.872	-0.134056	0.316785	-0.423175	0.672167
C2	96.0851	0.178068	0.426914	0.417105	0.676601
Clu	1122.79	-0.121414	0.291308	-0.416789	0.676833
Ifit2	113.061	0.143865	0.345452	0.416453	0.677079
Ifnar2	192.801	0.0888704	0.213536	0.416185	0.677275
Il23r	26.5753	0.132049	0.317679	0.415666	0.677654
Glycam1	8.18553	0.177125	0.427073	0.414742	0.678331
Prg2	8.34999	0.166727	0.402347	0.414385	0.678592
Ifng	10.5229	-0.163173	0.394166	-0.41397	0.678896
Cxcr5	5.34029	0.202634	0.494084	0.410121	0.681717
Sdha	3899.63	-0.142068	0.351938	-0.403673	0.686453
Cxcr6	47.8903	-0.167537	0.417105	-0.401666	0.68793
Ets1	634.01	-0.115651	0.288607	-0.400722	0.688625
Usp18	57.3705	0.186314	0.465057	0.400626	0.688695
Elane	5.95519	-0.181318	0.45475	-0.398721	0.690099
Klra3	4.77918	-0.186987	0.469493	-0.398274	0.690428
Ccl19	94.9697	-0.187423	0.472512	-0.396653	0.691623
Masp1	303.972	-0.123756	0.316912	-0.390506	0.696163
Ccl8	356.845	-0.340134	0.874782	-0.388822	0.697408
Casp8	431.377	0.0720463	0.186386	0.386544	0.699094
Tnfsf18	13.5226	0.144868	0.380884	0.380346	0.703688
Gbp2b	8.55677	0.19029	0.50068	0.380064	0.703898
H2-DMb2	27.0363	-0.169131	0.451108	-0.374923	0.707717
Cd163	278.707	-0.163352	0.43722	-0.373616	0.70869
Klra20	10.8488	0.170773	0.459561	0.371599	0.710191
Prkce	274.005	0.0753311	0.202955	0.371172	0.710509
Nfatc4	318.29	-0.101834	0.27783	-0.366533	0.713967
Cxcl10	114.095	0.270761	0.740739	0.365528	0.714717
Abcb1a	236.643	0.128979	0.353938	0.364412	0.71555
Cxcl16	289.828	-0.146001	0.401142	-0.363964	0.715885
Jak3	227.33	-0.0896057	0.246489	-0.363528	0.71621
Il1rap	452.783	0.0889485	0.248628	0.357757	0.720525
Osm	58.1218	-0.223481	0.628798	-0.355409	0.722283
Plaur	500.227	-0.210098	0.59131	-0.355309	0.722358
Cxcl13	784.306	0.307124	0.866133	0.354592	0.722895
Itga1	648.265	-0.0870335	0.247464	-0.351701	0.725062
Smpd3	1812.55	0.124471	0.355591	0.350041	0.726308
Fez1	63.3905	-0.156441	0.447845	-0.34932	0.726849
C1s1	1324.92	-0.113159	0.324467	-0.348752	0.727275
Irgm2	83.433	-0.137468	0.401512	-0.342376	0.732068
Blk	25.4128	-0.160755	0.471349	-0.341054	0.733063
Il2ra	43.9727	0.130546	0.384601	0.339434	0.734283
Ncam1	194.367	-0.124762	0.372335	-0.33508	0.737565
Mmp9	178.849	0.287885	0.862393	0.333821	0.738515
Gata3	40.776	-0.220578	0.662165	-0.333116	0.739047
Tal1	64.1226	0.0966334	0.290142	0.333056	0.739092
Traf3	309.822	0.0804317	0.242285	0.331971	0.739911
Mme	295.936	-0.121206	0.371332	-0.326408	0.744115
C8b	9.00847	-0.128431	0.397437	-0.323147	0.746584
Il1rapl2	13.5876	0.108777	0.338619	0.321238	0.74803
Cd1d2	14.4334	-0.139023	0.435992	-0.318867	0.749828
C4b	1223.77	-0.123529	0.392834	-0.314456	0.753174
Tnfsf8	11.5469	-0.121497	0.386456	-0.314389	0.753225
Pvr	207.092	0.0789582	0.251469	0.313988	0.75353
Chil3	103.183	0.216334	0.695115	0.31122	0.755633
Il7r	123.062	0.127001	0.411354	0.308739	0.75752
Bid	57.6393	0.115476	0.376595	0.306631	0.759124
Ppbp	309.985	0.251238	0.82802	0.30342	0.76157
Tlr9	26.2677	-0.0984392	0.324759	-0.303115	0.761802
Itgb3	119.753	-0.104047	0.34339	-0.303001	0.761889
Pmch	5.73828	-0.132592	0.438599	-0.302307	0.762418
Il17b	29.682	-0.128887	0.431689	-0.298565	0.765272
Flt3l	190.188	-0.0913052	0.307739	-0.296696	0.766698
Nfatc2	254.393	-0.100324	0.339221	-0.295747	0.767423
Irak1	531.054	0.053709	0.182001	0.295102	0.767916
Mapkapk2	1651.08	-0.0656852	0.222902	-0.294682	0.768237
Psmd7	4542.14	0.0669305	0.228502	0.292909	0.769591
Il3	6.14384	0.119414	0.41953	0.284639	0.775921
Cxcl3	237.768	-0.300407	1.06251	-0.282732	0.777382
Tnfrsf13c	13.0233	0.105878	0.381125	0.277805	0.781162
Ifna1	16.1813	0.120682	0.438703	0.275089	0.783248
Il10	9.04211	-0.101035	0.371265	-0.272137	0.785517
Rps6	382.678	-0.0898166	0.330843	-0.271478	0.786023
Bax	261.016	0.0592005	0.220877	0.268025	0.78868
Pycard	104.872	0.0806517	0.309621	0.260485	0.79449
Klra17	21.1255	-0.117355	0.453304	-0.258888	0.795722
Tnf	52.5389	-0.115196	0.447962	-0.257156	0.797058
Cyld	294.133	0.0651585	0.25388	0.256651	0.797448
Il5ra	8.23593	0.105675	0.411952	0.256523	0.797547
Flt3	21.8345	-0.0846372	0.332668	-0.25442	0.799171
Ccr8	12.6902	0.0950138	0.374349	0.253811	0.799642
Mr1	286.095	0.0724041	0.293662	0.246556	0.805252
Map2k2	2126.97	0.0468131	0.191952	0.24388	0.807324
Ddx60	68.4262	-0.110444	0.458843	-0.240701	0.809787
Lamp1	8970.08	0.0469471	0.195369	0.2403	0.810098
Zap70	22.8108	0.0841955	0.353735	0.238019	0.811867
Slamf6	9.34986	0.0955489	0.406001	0.235342	0.813943
Eef1g	7976.4	0.0418577	0.18073	0.231604	0.816845
Il2rb	96.6592	0.0987703	0.429407	0.230016	0.81808
Ltb	26.1924	-0.113952	0.503923	-0.226129	0.821101
Cd160	11.4256	0.0822163	0.364583	0.225508	0.821584
Irf2	366.447	0.048567	0.215589	0.225276	0.821765
Gzmk	5.96362	0.095822	0.426382	0.224733	0.822187
Xcl1	8.34647	0.0925828	0.412162	0.224627	0.822269
Il18r1	44.3499	-0.0633809	0.285516	-0.221987	0.824324
Ifnl2	10.5481	-0.114098	0.516914	-0.22073	0.825303
Stat2	272.905	-0.0560613	0.255382	-0.219519	0.826245
Inpp5d	86.8944	0.0654831	0.299376	0.218732	0.826859
Cd276	252.658	0.0776872	0.362755	0.214159	0.830423
Ltk	11.8979	0.0832632	0.38914	0.213967	0.830573
Mertk	141.201	0.0792803	0.372772	0.212678	0.831578
Ikbke	314.889	-0.0556847	0.272036	-0.204696	0.837809
Klrb1	10.445	-0.0824034	0.41043	-0.200774	0.840876
Fut7	11.6262	-0.0689311	0.346676	-0.198834	0.842392
Psmb9	205.012	0.0725211	0.365861	0.19822	0.842873
Kdr	388.325	-0.0759849	0.394425	-0.192647	0.847235
Tyk2	233.017	-0.0511924	0.268918	-0.190364	0.849024
Relb	304.433	-0.0516245	0.272757	-0.189269	0.849882
Cd36	5810.34	0.083138	0.446585	0.186164	0.852316
Trp53	701.452	-0.0589174	0.32074	-0.183692	0.854255
Abca1	606.501	-0.0479358	0.261126	-0.183573	0.854348
Tek	447.671	-0.0650548	0.356089	-0.182693	0.855039
Cxcl1	401.587	-0.147337	0.836921	-0.176047	0.860257
Cd247	30.2325	-0.068784	0.392179	-0.175389	0.860774
Marco	12.0337	-0.0862594	0.518977	-0.166211	0.867991
Spink5	801.946	0.064606	0.393515	0.164177	0.869592
Entpd1	254.997	-0.0370689	0.227997	-0.162585	0.870845
Ccr3	9.63822	0.116528	0.730379	0.159545	0.873239
Card9	23.9877	-0.0514062	0.324812	-0.158264	0.874249
Sh2d1b1	15.7411	0.0578707	0.378807	0.152771	0.878579
Klra2	31.6227	-0.0655695	0.42938	-0.152708	0.878629
Nfkb2	643.667	-0.0396447	0.266166	-0.148947	0.881595
Pla2g6	235.446	0.0347176	0.236221	0.146971	0.883155
Cd4	28.5763	0.0597551	0.420903	0.141969	0.887105
Kit	61.6513	0.047783	0.336837	0.141858	0.887192
Crp	10.654	0.0512561	0.370648	0.138288	0.890013
Oaz1	6889.96	-0.0313384	0.231389	-0.135436	0.892267
Rora	1189.47	0.0298014	0.2243	0.132864	0.894301
Zbp1	78.0649	0.0697618	0.529284	0.131804	0.895139
Tgfb2	175.897	0.0411206	0.313811	0.131036	0.895747
Pdcd1	31.5932	0.0645314	0.495193	0.130316	0.896317
Pla2g1b	8.06936	0.0516017	0.39707	0.129956	0.896601
Tmed1	377.965	0.0319543	0.250044	0.127795	0.898311
Ptgs2	560.235	-0.119352	0.96706	-0.123418	0.901776
Socs3	425.054	-0.0461033	0.375573	-0.122755	0.902301
Gpr183	37.258	-0.052253	0.435895	-0.119875	0.904582
Cd55	202.597	-0.0467131	0.395458	-0.118124	0.905969
Mfge8	393.445	-0.0235365	0.200656	-0.117298	0.906624
Cklf	23.7241	0.0365281	0.313981	0.116339	0.907384
Socs1	134.216	0.0358881	0.327673	0.109524	0.912787
Foxj1	6.03301	0.0466082	0.427245	0.10909	0.913131
Klra15	7.03524	0.0534558	0.496864	0.107586	0.914324
Cd19	5.9445	-0.0474866	0.442026	-0.107429	0.914448
Tnfsf13	89.1105	0.0385098	0.368278	0.104567	0.916719
Lyve1	264.948	-0.0374344	0.358933	-0.104294	0.916936
Eng	1077.48	-0.0277427	0.266293	-0.104181	0.917025
Irf1	519.5	0.0373015	0.361904	0.10307	0.917907
Raet1	35.8291	-0.0484787	0.477096	-0.101612	0.919065
Txk	8.80338	0.0443335	0.441689	0.100373	0.920048
Syt17	17.9331	0.0329219	0.331253	0.0993858	0.920832
Ccl17	29.8014	0.0385975	0.393309	0.0981353	0.921825
Vegfa	2920.91	0.0281098	0.294344	0.0954997	0.923918
Oasl1	114.78	0.0385042	0.405357	0.0949884	0.924324
H2-T23	1704.13	-0.0272522	0.29285	-0.0930586	0.925857
Tgfbr2	2182.85	-0.0186813	0.203272	-0.0919028	0.926775
Tigit	23.3996	0.0311557	0.340017	0.0916299	0.926992
Cd14	359.587	-0.047555	0.519864	-0.0914759	0.927114
Mpo	12.0426	0.0360268	0.432293	0.0833388	0.933582
Dpp4	92.9962	0.0357724	0.446501	0.080117	0.936144
Il12b	16.1646	0.0418799	0.551403	0.0759516	0.939458
Cxcr3	24.8589	-0.0209829	0.278072	-0.0754584	0.93985
Il27	7.92021	-0.0321111	0.426152	-0.0753513	0.939935
Pml	416.907	-0.0186966	0.267949	-0.0697767	0.944371
Ddx58	168.576	-0.020539	0.302186	-0.0679679	0.945811
Il18	667.936	-0.0250594	0.378343	-0.0662345	0.947191
Plau	1345.21	-0.0246362	0.388621	-0.0633938	0.949453
Arg1	2855.06	0.027902	0.440692	0.0633142	0.949516
Itga5	224.368	-0.0287334	0.455609	-0.063066	0.949714
Atg5	248.038	0.0184308	0.294327	0.0626201	0.950069
Cma1	284.867	0.0312081	0.526215	0.0593067	0.952708
Vwf	526.086	0.021014	0.364953	0.0575799	0.954083
Ccl1	11.8627	0.0218473	0.389081	0.0561509	0.955222
Fasl	7.0903	0.0229488	0.443702	0.0517212	0.958751
S100b	39.2029	0.0244591	0.474558	0.0515408	0.958895
Cspg4	370.112	-0.0134853	0.279977	-0.0481658	0.961584
Fadd	89.6121	-0.0139574	0.29208	-0.0477864	0.961886
H60a	12.4396	0.0207482	0.438386	0.0473286	0.962251
Il2	7.77513	0.0182604	0.386002	0.0473065	0.962269
Ifit3	143.315	0.0271337	0.595878	0.0455356	0.96368
Pdcd1lg2	23.6344	0.0203288	0.446698	0.0455091	0.963702
Klrg1	16.1649	0.0164522	0.370143	0.0444481	0.964547
Foxp3	18.4698	0.0180898	0.421533	0.0429142	0.96577
Herc6	58.2296	-0.0110244	0.260885	-0.0422575	0.966293
Lrp1	3106.26	0.00997831	0.243879	0.040915	0.967364
Il12rb2	31.5118	0.0233834	0.623347	0.0375126	0.970076
Ada	9547.86	-0.0163529	0.447303	-0.0365589	0.970837
Cxcl2	169.802	0.0299109	0.881522	0.0339309	0.972932
Stat1	478.483	0.0102689	0.36778	0.0279214	0.977725
Cd3d	37.954	-0.0103514	0.413151	-0.0250548	0.980011
Cd44	43.233	-0.0065722	0.297885	-0.0220629	0.982398
Cd274	180.332	-0.0065064	0.391833	-0.016605	0.986752
Rag1	11.5371	0.00472576	0.386883	0.012215	0.990254
Lamp3	6.64457	0.00479228	0.402884	0.0118949	0.990509
Hmgb1	1082.47	-0.00157915	0.209205	-0.00754835	0.993977
Irf3	780.433	0.0013115	0.295157	0.00444338	0.996455
Amica1	169.257	-0.45043	0.448717	-1.00382	NA
Nefl	60.8395	3.63561	1.01679	3.57558	NA
