# Supplementary material for: Epithelial Mutant p53 Promotes Resistance to Anti-PD-1-Mediated Oral Cancer Immunoprevention in Carcinogen-Induced Mouse Models
Source: Cancers (Basel). 2021 Mar 23;13(6):1471. doi: 10.3390/cancers13061471 (PMC8005156; doi:10.3390/cancers13061471)
Supplement: Supplementary file 1 [file cancers-13-01471-s001.zip › Supplementary Table S6.xlsx]

## Sheet: Reactome GOF vs LOF
Supplementary Table S6
GSEA analysis for Reactome pathways GOF vs LOF
NAME	NES	NOM p-val	FDR q-val
REACTOME_INTERLEUKIN_17_SIGNALING	2.14079	0	0.00623717
REACTOME_TRANSCRIPTIONAL_REGULATION_BY_TP53	2.06606	0	0.00837384
REACTOME_NOD1_2_SIGNALING_PATHWAY	1.88004	0.00452489	0.042414
REACTOME_DISEASES_OF_SIGNAL_TRANSDUCTION	1.87795	0	0.0321959
REACTOME_ANTIVIRAL_MECHANISM_BY_IFN_STIMULATED_GENES	1.8546	0.00205761	0.0316403
REACTOME_MYD88_CASCADE_INITIATED_ON_PLASMA_MEMBRANE	1.75047	0	0.0665322
REACTOME_METABOLISM_OF_RNA	1.7417	0.00653595	0.0617547
REACTOME_UB_SPECIFIC_PROCESSING_PROTEASES	1.70044	0.0125261	0.0760253
REACTOME_DEATH_RECEPTOR_SIGNALLING	1.67257	0.00902935	0.0869898
REACTOME_NUCLEOTIDE_BINDING_DOMAIN_LEUCINE_RICH_REPEAT_CONTAINING_RECEPTOR_NLR_SIGNALING_PATHWAYS	1.66352	0.00858369	0.0832298
REACTOME_TRAF6_MEDIATED_IRF7_ACTIVATION	1.65521	0.0247748	0.0807625
REACTOME_DEUBIQUITINATION	1.65041	0.0178174	0.0769477
REACTOME_TOLL_LIKE_RECEPTOR_9_TLR9_CASCADE	1.63387	0.0131868	0.0797646
REACTOME_TRIF_TICAM1_MEDIATED_TLR4_SIGNALING	1.60099	0.00877193	0.0949413
REACTOME_METABOLISM_OF_LIPIDS	1.56181	0.0385396	0.114517
REACTOME_GENE_EXPRESSION_TRANSCRIPTION	1.55453	0.00917431	0.113272
REACTOME_TAK1_ACTIVATES_NFKB_BY_PHOSPHORYLATION_AND_ACTIVATION_OF_IKKS_COMPLEX	1.54838	0.0322581	0.110743
REACTOME_GENERIC_TRANSCRIPTION_PATHWAY	1.53102	0	0.117929
REACTOME_TOLL_LIKE_RECEPTOR_TLR1:TLR2_CASCADE	1.50233	0.0187793	0.136632
REACTOME_MAPK_TARGETS_NUCLEAR_EVENTS_MEDIATED_BY_MAP_KINASES	1.49722	0.0561331	0.13342
REACTOME_SIGNALING_BY_NOTCH	1.49112	0.0364026	0.132289
REACTOME_DDX58_IFIH1_MEDIATED_INDUCTION_OF_INTERFERON_ALPHA_BETA	1.48752	0.0336538	0.128948
REACTOME_DOWNSTREAM_SIGNALING_EVENTS_OF_B_CELL_RECEPTOR_BCR	1.48748	0.0503145	0.123415
REACTOME_PTEN_REGULATION	1.47909	0.058952	0.125128
REACTOME_CELLULAR_SENESCENCE	1.45863	0.0567227	0.136745
REACTOME_SIGNALING_BY_VEGF	1.44079	0.0840517	0.146479
REACTOME_SIGNALING_BY_NTRKS	1.42469	0.0814978	0.154445
REACTOME_CELLULAR_RESPONSES_TO_EXTERNAL_STIMULI	1.42328	0.0578704	0.150462
REACTOME_CELL_CYCLE_MITOTIC	1.39867	0.087963	0.168137
REACTOME_DEVELOPMENTAL_BIOLOGY	1.39578	0.0411311	0.165876
REACTOME_INTRACELLULAR_SIGNALING_BY_SECOND_MESSENGERS	1.37958	0.0615034	0.17549
REACTOME_INTERLEUKIN_1_SIGNALING	1.37336	0.0623608	0.175789
REACTOME_CELLULAR_RESPONSES_TO_STRESS	1.34614	0.0917031	0.19782

## Sheet: Reactome GOF vs WT
Supplementary Table S6
GSEA analysis for Reactome pathways GOF vs WT
NAME	NES	NOM p-val	FDR q-val
REACTOME_INTERLEUKIN_17_SIGNALING	2.18561	0	0
REACTOME_DEATH_RECEPTOR_SIGNALLING	2.15192	0	0
REACTOME_TRANSCRIPTIONAL_REGULATION_BY_TP53	2.05972	0	0.00122279
REACTOME_DISEASES_OF_SIGNAL_TRANSDUCTION	2.04246	0	0.00129709
REACTOME_DDX58_IFIH1_MEDIATED_INDUCTION_OF_INTERFERON_ALPHA_BETA	2.01576	0	0.00155293
REACTOME_MYD88_CASCADE_INITIATED_ON_PLASMA_MEMBRANE	2.01396	0	0.00129411
REACTOME_DEUBIQUITINATION	1.99571	0.00185185	0.00166199
REACTOME_TRIF_TICAM1_MEDIATED_TLR4_SIGNALING	1.97783	0	0.00276178
REACTOME_DOWNSTREAM_SIGNALING_EVENTS_OF_B_CELL_RECEPTOR_BCR	1.96518	0	0.00361709
REACTOME_NUCLEOTIDE_BINDING_DOMAIN_LEUCINE_RICH_REPEAT_CONTAINING_RECEPTOR_NLR_SIGNALING_PATHWAYS	1.92679	0	0.0044252
REACTOME_INTERLEUKIN_1_SIGNALING	1.92572	0	0.00414203
REACTOME_GENE_EXPRESSION_TRANSCRIPTION	1.90776	0	0.00464818
REACTOME_SIGNALING_BY_NOTCH	1.90444	0.00189036	0.00451851
REACTOME_ESR_MEDIATED_SIGNALING	1.87971	0.00187266	0.00564438
REACTOME_SIGNALING_BY_NUCLEAR_RECEPTORS	1.87003	0	0.00589318
REACTOME_TOLL_LIKE_RECEPTOR_9_TLR9_CASCADE	1.86874	0	0.00560273
REACTOME_ACTIVATION_OF_NF_KAPPAB_IN_B_CELLS	1.85655	0.00187617	0.0063448
REACTOME_UB_SPECIFIC_PROCESSING_PROTEASES	1.85445	0.00193798	0.00628173
REACTOME_GENERIC_TRANSCRIPTION_PATHWAY	1.82604	0.0035524	0.00838789
REACTOME_CELLULAR_SENESCENCE	1.82532	0.00548446	0.00803183
REACTOME_CELLULAR_RESPONSES_TO_STRESS	1.81627	0.00185529	0.00849542
REACTOME_DISEASE	1.80798	0	0.00884239
REACTOME_ANTIVIRAL_MECHANISM_BY_IFN_STIMULATED_GENES	1.80743	0.00530973	0.00845794
REACTOME_CELLULAR_RESPONSES_TO_EXTERNAL_STIMULI	1.79517	0	0.00934677
REACTOME_TAK1_ACTIVATES_NFKB_BY_PHOSPHORYLATION_AND_ACTIVATION_OF_IKKS_COMPLEX	1.77572	0.00959693	0.0104877
REACTOME_INTERLEUKIN_1_FAMILY_SIGNALING	1.76271	0.00192308	0.0113376
REACTOME_METABOLISM_OF_RNA	1.75737	0.00571429	0.0115014
REACTOME_CYTOSOLIC_SENSORS_OF_PATHOGEN_ASSOCIATED_DNA	1.74853	0.00965251	0.0122083
REACTOME_NOD1_2_SIGNALING_PATHWAY	1.72645	0.00785855	0.0147787
REACTOME_FC_EPSILON_RECEPTOR_FCERI_SIGNALING	1.72251	0.00363636	0.0149026
REACTOME_TOLL_LIKE_RECEPTOR_TLR1:TLR2_CASCADE	1.72067	0.00185529	0.0145429
REACTOME_NEGATIVE_REGULATORS_OF_DDX58_IFIH1_SIGNALING	1.65709	0.0211538	0.0247091
REACTOME_CLEC7A_DECTIN_1_SIGNALING	1.64102	0.0109091	0.0273526
REACTOME_DEVELOPMENTAL_BIOLOGY	1.62462	0.00700525	0.0295186
REACTOME_DOWNSTREAM_TCR_SIGNALING	1.60669	0.0184843	0.0331569
REACTOME_INTRACELLULAR_SIGNALING_BY_SECOND_MESSENGERS	1.60074	0.0095057	0.0342655
REACTOME_TRAF6_MEDIATED_NF_KB_ACTIVATION	1.57778	0.0337079	0.03921
REACTOME_CELL_CYCLE	1.57311	0.0292505	0.0396796
REACTOME_INTERLEUKIN_20_FAMILY_SIGNALING	1.56461	0.027933	0.0410842
REACTOME_TCR_SIGNALING	1.52752	0.0223464	0.0532552
REACTOME_MAPK_TARGETS_NUCLEAR_EVENTS_MEDIATED_BY_MAP_KINASES	1.52487	0.0646388	0.0529389
REACTOME_CELL_CYCLE_MITOTIC	1.50826	0.0462428	0.058168
REACTOME_TRAF6_MEDIATED_IRF7_ACTIVATION	1.47475	0.0567515	0.0718308
REACTOME_INTERLEUKIN_12_FAMILY_SIGNALING	1.46797	0.0472727	0.0734688
REACTOME_PTEN_REGULATION	1.45912	0.062963	0.076004
REACTOME_C_TYPE_LECTIN_RECEPTORS_CLRS	1.40366	0.0602637	0.105334
REACTOME_INFECTIOUS_DISEASE	1.39646	0.082243	0.10748
REACTOME_PROGRAMMED_CELL_DEATH	1.39422	0.0699301	0.106676
REACTOME_PI3K_AKT_SIGNALING_IN_CANCER	1.38473	0.106343	0.110717
REACTOME_POST_TRANSLATIONAL_PROTEIN_MODIFICATION	1.3762	0.0650995	0.114709
REACTOME_RHO_GTPASE_EFFECTORS	1.36108	0.0996377	0.123419
REACTOME_SIGNALING_BY_THE_B_CELL_RECEPTOR_BCR	1.35569	0.0887246	0.12475
REACTOME_TOLL_LIKE_RECEPTOR_4_TLR4_CASCADE	1.3284	0.0887681	0.143385
REACTOME_FCERI_MEDIATED_NF_KB_ACTIVATION	1.31595	0.124294	0.150787
REACTOME_SIGNALING_BY_INTERLEUKINS	1.31417	0.0306306	0.149355
REACTOME_TRANSCRIPTIONAL_REGULATION_BY_RUNX3	1.26912	0.160232	0.187817
REACTOME_SIGNALING_BY_RHO_GTPASES	1.25604	0.172862	0.197306

## Sheet: REACTOME_IL17 GOF vs LOF
Supplementary Table S6
REACTOME_INTERLEUKIN_17_SIGNALING: GOF vs LOF
NAME	PROBE	GENE SYMBOL	GENE_TITLE	RANK IN GENE LIST	RANK METRIC SCORE	RUNNING ES	CORE ENRICHMENT
row_0	IRAK2	null	null	5	2.77757	0.0636639	Yes
row_1	MAPK8	null	null	18	2.39946	0.107904	Yes
row_2	IL17F	null	null	35	2.17024	0.14071	Yes
row_3	IRAK1	null	null	44	2.03708	0.181333	Yes
row_4	JUN	null	null	55	1.87934	0.215141	Yes
row_5	RIPK2	null	null	59	1.86618	0.258418	Yes
row_6	MAPKAPK2	null	null	62	1.85974	0.302933	Yes
row_7	TAB1	null	null	63	1.85418	0.350106	Yes
row_8	NOD1	null	null	81	1.67123	0.368816	Yes
row_9	TRAF6	null	null	96	1.5523	0.388702	Yes
row_10	IKBKG	null	null	111	1.46572	0.406384	Yes
row_11	IL25	null	null	125	1.34093	0.422293	Yes
row_12	ATF2	null	null	146	1.22475	0.425442	Yes
row_13	MAPK14	null	null	151	1.20939	0.450609	Yes
row_14	MEF2C	null	null	152	1.20127	0.481171	Yes
row_15	IL17A	null	null	162	1.13613	0.497472	Yes
row_16	UBC	null	null	167	1.11356	0.5202	Yes
row_17	ELK1	null	null	187	0.992414	0.518839	Yes
row_18	CHUK	null	null	203	0.895546	0.520615	Yes
row_19	IKBKB	null	null	207	0.885497	0.538942	Yes
row_20	MAP2K1	null	null	217	0.842447	0.54777	Yes
row_21	MAP2K4	null	null	235	0.76163	0.543338	Yes
row_22	MAP3K7	null	null	243	0.736671	0.552276	Yes
row_23	ATF1	null	null	254	0.704321	0.55619	Yes
row_24	MAPK1	null	null	282	0.55131	0.532401	No
row_25	DUSP4	null	null	296	0.478383	0.526365	No
row_26	MAPK3	null	null	300	0.436071	0.533257	No
row_27	IL17RA	null	null	338	0.232085	0.487341	No
row_28	FOS	null	null	343	0.211983	0.487132	No
row_29	NFKB1	null	null	344	0.201885	0.492269	No
row_30	CREB1	null	null	356	0.146631	0.480593	No
row_31	MAPK11	null	null	395	-0.0344277	0.428248	No
row_32	IL17RB	null	null	454	-0.329956	0.35541	No
row_33	NOD2	null	null	550	-0.875992	0.244644	No
row_34	DUSP6	null	null	598	-1.22895	0.210084	No

## Sheet: REACTOME_IL17 GOF vs WT
Supplementary Table S6
REACTOME_INTERLEUKIN_17_SIGNALING: GOF vs WT
NAME	PROBE	GENE SYMBOL	GENE_TITLE	RANK IN GENE LIST	RANK METRIC SCORE	RUNNING ES	CORE ENRICHMENT
row_0	FOS	null	null	2	3.24203	0.0734976	Yes
row_1	JUN	null	null	10	2.60714	0.125051	Yes
row_2	NOD2	null	null	34	2.14185	0.143244	Yes
row_3	IKBKB	null	null	44	1.99077	0.177491	Yes
row_4	NFKB1	null	null	52	1.92509	0.212992	Yes
row_5	IL17F	null	null	53	1.91317	0.258017	Yes
row_6	CHUK	null	null	73	1.73404	0.272216	Yes
row_7	MAPK14	null	null	84	1.66324	0.297353	Yes
row_8	ATF2	null	null	85	1.66157	0.336457	Yes
row_9	TRAF6	null	null	89	1.63059	0.37063	Yes
row_10	IL17A	null	null	103	1.57402	0.389466	Yes
row_11	IRAK2	null	null	137	1.31357	0.374161	Yes
row_12	MAP2K4	null	null	144	1.27614	0.395791	Yes
row_13	IL25	null	null	156	1.23431	0.409433	Yes
row_14	MAPK3	null	null	182	1.05954	0.399354	Yes
row_15	MAPK8	null	null	184	1.05786	0.42285	Yes
row_16	IL17RA	null	null	185	1.05654	0.447714	Yes
row_17	IKBKG	null	null	186	1.04839	0.472387	Yes
row_18	MAP2K1	null	null	191	0.989657	0.490076	Yes
row_19	DUSP6	null	null	199	0.936776	0.502318	Yes
row_20	MAPK1	null	null	212	0.837888	0.505231	Yes
row_21	UBC	null	null	215	0.831279	0.521993	Yes
row_22	ELK1	null	null	217	0.806959	0.539583	Yes
row_23	MAP3K7	null	null	218	0.803776	0.5585	Yes
row_24	RIPK2	null	null	224	0.776371	0.569768	Yes
row_25	ATF1	null	null	228	0.761844	0.583496	Yes
row_26	TAB1	null	null	229	0.759163	0.601362	Yes
row_27	CREB1	null	null	284	0.476488	0.536946	No
row_28	IRAK1	null	null	324	0.295102	0.489269	No
row_29	MAPKAPK2	null	null	450	-0.294682	0.321134	No
row_30	IL17RB	null	null	514	-0.651214	0.248224	No
row_31	NOD1	null	null	518	-0.659828	0.259551	No
row_32	MEF2C	null	null	534	-0.713812	0.255342	No
row_33	DUSP4	null	null	550	-0.789025	0.252903	No
row_34	MAPK11	null	null	585	-0.977635	0.228291	No
